# Supplementary material for: Characteristics, risk factors and mortality of stroke patients in Kyoto, Japan
Source: PubMed Central journal article supplement — BMJ Open. 2013 Mar 5;3(3):e002181. doi: 10.1136/bmjopen-2012-002181 (PMC3612757; doi:10.1136/bmjopen-2012-002181), 2013-03-05
Supplement: bmjopen-2012-002181.draft_revisions.pdf [file bmjopen-2012-002181.draft_revisions.pdf]

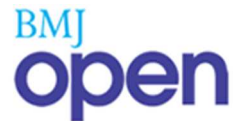

## Characteristics, risk factors and mortality of stroke patients in Kyoto, Japan

|                                 |                                                                                                                                                                                                                                                                                                                                                                                                                                                                                                                                                                                                                                                                                                                                                                                    |
|---------------------------------|------------------------------------------------------------------------------------------------------------------------------------------------------------------------------------------------------------------------------------------------------------------------------------------------------------------------------------------------------------------------------------------------------------------------------------------------------------------------------------------------------------------------------------------------------------------------------------------------------------------------------------------------------------------------------------------------------------------------------------------------------------------------------------|
| Journal:                        | <i>BMJ Open</i>                                                                                                                                                                                                                                                                                                                                                                                                                                                                                                                                                                                                                                                                                                                                                                    |
| Manuscript ID:                  | bmjopen-2012-002181                                                                                                                                                                                                                                                                                                                                                                                                                                                                                                                                                                                                                                                                                                                                                                |
| Article Type:                   | Research                                                                                                                                                                                                                                                                                                                                                                                                                                                                                                                                                                                                                                                                                                                                                                           |
| Date Submitted by the Author:   | 05-Oct-2012                                                                                                                                                                                                                                                                                                                                                                                                                                                                                                                                                                                                                                                                                                                                                                        |
| Complete List of Authors:       | Shigematsu, Kazuo; National Hospital Organization, Minami Kyoto Hospital, Neurology<br>Nakano, Hiromi; Kyoto Kidugawa Hospital, Neurosurgery<br>Watanabe, Yoshiyuki; Kyoto Prefectural University of Medicine, Graduate School of Medical Science, Epidemiology for Community Health and Medicine<br>Sekimoto, Tatsuyuki; Kyoto Prefectural Yosanoumi Hospital, Neurosurgery<br>Shimizu, Kouichiro; Kyoto Fushimi Shimizu Hospital, Neurosurgery<br>Nishizawa, Akihiko; The Nishizawa Clinic, Internal Medicine<br>Makino, Masahiro; Japanese Red Cross Kyoto Daini Hospital, Neurology<br>Okumura, Atsushi; Kyoto Jujo Rehabilitation Hospital, Neurosurgery<br>Bando, Kazuhiko; The Bando Clinic, Internal Medicine<br>Kitagawa, Yasushi; The Kitagawa Clinic, Internal Medicine |
| <b>Primary Subject Heading</b>: | Public health                                                                                                                                                                                                                                                                                                                                                                                                                                                                                                                                                                                                                                                                                                                                                                      |
| Secondary Subject Heading:      | Public health, Health informatics, Epidemiology                                                                                                                                                                                                                                                                                                                                                                                                                                                                                                                                                                                                                                                                                                                                    |
| Keywords:                       | PUBLIC HEALTH, EPIDEMIOLOGY, STROKE MEDICINE                                                                                                                                                                                                                                                                                                                                                                                                                                                                                                                                                                                                                                                                                                                                       |
|                                 |                                                                                                                                                                                                                                                                                                                                                                                                                                                                                                                                                                                                                                                                                                                                                                                    |

SCHOLARONE™  
Manuscripts

Characteristics, risk factors and mortality of stroke patients in Kyoto, Japan

**Short title:** Characteristics, risk factors and mortality of Stroke

Kazuo Shigematsu<sup>1</sup>, Hiromi Nakano<sup>2</sup>, Yoshiyuki Watanabe<sup>3</sup>, Tatsuyuki Sekimoto<sup>4</sup>,  
Kouichiro Shimizu<sup>5</sup>, Akihiko Nishizawa<sup>6</sup>, Masahiro Makino<sup>7</sup>, Atsushi Okumura<sup>8</sup>,  
Kazuhiko Bando<sup>9</sup>, Yasushi Kitagawa<sup>10</sup>

From: <sup>1</sup>National Hospital Organization, Minami Kyoto Hospital, <sup>2</sup>Kyoto Kidugawa Hospital, <sup>3</sup>Kyoto Prefectural University of Medicine, <sup>4</sup>Kyoto Yosanoumi Hospital, <sup>5</sup>Kyoto Fushimi Shimizu Hospital, <sup>6</sup>The Nishizawa Clinic, <sup>7</sup>Japanese Red Cross Kyoto Daini Hospital, <sup>8</sup>Jujoyo Rehabilitation Hospital, <sup>9</sup>The Bando Clinic, <sup>10</sup>The Kitagawa Clinic.

Correspondence to Kazuo Shigematsu, MD

Department of Neurology, the National Hospital Organization, Minami Kyoto Hospital  
11 Nakaashihara, Jouyou-shi, Kyoto, Japan, 610-0113

Phone 81-774-52-0065, Fax 81-774-55-2765, E-mail neuron.k07@gmail.com

**Keywords:** epidemiology, public health, stroke medicine

**Contributorship:** All authors equally contributed to this study

**Funding:** none

**Competing interests:** none

**Data sharing:** There are no additional data available.

1  
2  
3  
4  
5  
6 *Article Summary*  
7  
8

9  
10 **Article focus**  
11

12  
13 The focus on this study is on:  
14

15  
16  
17 The characteristics, risk factors and outcome of contemporary stroke patients:  
18

19  
20  
21 Age, sex, vital signs  
22

23  
24 Histories of hypertension, arrhythmia, diabetes mellitus and hyperlipemia  
25

26  
27 Usages of tobacco and alcohol  
28

29  
30  
31 Hazard ratio for death  
32  
33

34  
35  
36 **Key messages**  
37

38  
39  
40 About two thirds of patients have hypertension history, whereas only about one  
41  
42 fifth have histories of arrhythmia, diabetes mellitus and hyperlipemia.  
43

44  
45  
46 About one tenth of patients died within a month.  
47

48  
49  
50 Hazard ratio for death is highest in subarachnoid hemorrhage, followed by  
51  
52 cerebral hemorrhage and lowest in cerebral infarction.  
53  
54

### Strengths and limitations of this study

This study provided quantitative data on fundamentals of contemporary stroke in a very large cohort in Kyoto Japan.

Detailed information on size and localization of stroke and on treatment and complication was not available in this population based study.

1  
2  
3  
4  
5  
6 **Objectives:** The aim of the study is to evaluate characteristics, risk factors and outcome  
7  
8  
9 of recent stroke patients in Kyoto Japan.  
10

11  
12  
13  
14  
15  
16 **Design:** We analyzed stroke patients in the registry in a quantitative manner with regard  
17  
18 to their characteristics, risk factors, and mortality. Cox proportional hazards regression  
19  
20 was used to calculate adjusted hazard ratios for death and their 95% confidence  
21  
22 intervals.  
23  
24  
25  
26  
27  
28  
29  
30

31 **Settings:** Kyoto Stroke Registry registers all new stroke patients in Kyoto prefecture  
32  
33 with about 2,630,000 residents.  
34  
35  
36  
37  
38  
39

40 **Participants:** The registry now has data on 14,268 patients enrolled from January 1,  
41  
42 1999 to December 31, 2009. Of these 12,774 (89.5%), 9232 (64.7%), 2504 (17.5%),  
43  
44 and 342 (2.4%) underwent CT, MRI scan, angiography, and scintigraphy for blood flow.  
45  
46 Excluding 480 (3.3%) unclassified patients, 13,788 (96.6%) patients formed the basis of  
47  
48 further analyses dividing them into three subtypes of stroke, cerebral infarction (CI),  
49  
50 cerebral hemorrhage (CH), and subarachnoid hemorrhage (SAH).  
51  
52  
53  
54  
55  
56  
57  
58  
59  
60

1  
2  
3  
4  
5  
6  
7  
8  
9 **Results:** A total of 13,788 confirmed stroke patients in the study cohort comprised  
10  
11 9,011 (86.3%) CI, 3,549 (25.7%) CH and 1,197 (8.7%) SAH cases. The mean age was  
12  
13  
14 oldest in the CI cases, and youngest in the SAH cases. In the CI and CH cases, males  
15  
16 were predominant, whereas in the SAH cases, females were predominant. Frequencies  
17  
18 of risk factors, including tobacco and alcohol usage, were also different among the  
19  
20 subtypes. Mortality was worst in the SAH, followed by the CH, and least in the CI.  
21  
22  
23  
24  
25  
26 Adjusted hazard ratios for death showed a significant ( $P<0.001$ ) difference among CI (a  
27  
28 reference), CH (1.745; 1.454-2.094) and SAH (2.966; 2.384-3.690).  
29  
30  
31  
32  
33  
34

35 **Conclusions:** Characteristics, risk factors, and mortality were evaluated in a  
36  
37 quantitative manner in a large Japanese study cohort to shed light on the present status  
38  
39 of stroke medicine. Hazard ratios for death were about three times worse in SAH than in  
40  
41  
42  
43  
44 CI.  
45  
46  
47  
48  
49  
50  
51  
52  
53  
54  
55  
56  
57  
58  
59  
60

## Introduction

Stroke, the third major cause of death, constitutes the largest cause of acquired disability in Japan<sup>1</sup>. According to a report of the Ministry of Health, Labor and Welfare, about 123,400 people died from stroke in 2010. About 10.3% of the total national death resulted from stroke. Sustained exposure to risk factors associated with lifestyle which patients live in play an important role in stroke incidence. Stroke is regarded as one of the diseases developed by long lasting exposure to risk factors associated with lifestyle. The incidence, as well as mortality, should be greatly affected by society, regions and times<sup>2,3</sup>. The updated detailed information on stroke events in each society is required. A long-term surveillance of stroke, comparing characteristics, risk factors, and mortality, based on the entire population in a prefecture as large as Kyoto, which has about 2,630,000 residents, should provide a fundamental database of stroke. Stroke consists of three major distinct subtypes, namely, cerebral infarction (CI), cerebral hemorrhage (CH), and subarachnoid hemorrhage (SAH). Although these subtypes, as disorders of the cerebral arteries, have many things in common, distinct characteristics prevail. Quantitative measurement of these differences in the same large cohort should help characterize three stroke subtypes<sup>4</sup>. The strength of comparing these three stroke

1  
2  
3  
4  
5  
6 subtypes in the same large cohort is that, by doing so, we can evaluate the relative  
7  
8  
9 strength of the risk factors influencing each subtype. These data also should help  
10  
11  
12 confirm a higher mortality rate in hemorrhagic stroke than ischemic stroke, and  
13  
14  
15 elucidate hazard ratios for death estimated simultaneously among major stroke subtypes,  
16  
17  
18 which should reflect relative severities of stroke.  
19

20  
21  
22  
23  
24 The Kyoto prefecture of Japan has established a registry to enroll all new  
25  
26  
27 stroke patients in cooperation with the Kyoto Medical Association and its affiliated  
28  
29  
30 hospitals with help from the data collecting agency known as the Kyoto Stroke Registry  
31  
32  
33 <sup>5</sup>. We studied all patients registered during the past 11 years in the prefecture of Kyoto  
34  
35  
36 to document characteristics, risk factors, and hazard ratios in the three major stroke  
37  
38  
39 subtypes.  
40  
41  
42  
43

#### 44 **Methods**

45  
46  
47  
48  
49  
50 We analyzed all stroke patients identified from January 1999 to December  
51  
52  
53 2009 in the entire Kyoto prefecture and registered in the Kyoto Stroke Registry run by  
54  
55  
56  
57  
58  
59  
60



1  
2  
3  
4  
5  
6 the local government of Kyoto prefecture. The diagnosis of stroke was confirmed by  
7  
8  
9 local neurologists and/or neurosurgeons based on the WHO definition <sup>6</sup>.

10  
11 We classified the patients into CI (ICD-9 code 433 and 434, ICD-10 code I63),  
12  
13 CH (ICD-9 code 431, ICD-10 code I61), SAH (ICD-9 code 430, ICD-10 code I60) <sup>7 8</sup>  
14  
15 and others by neurological examination and the findings of CT scans, MRI scans,  
16  
17 angiographies, and scintigraphies. Each registry recorded age, sex, date of stroke onset,  
18  
19  
20  
21 blood pressure and arrhythmia on arrival, history of hypertension, arrhythmia, diabetes  
22  
23  
24  
25  
26 mellitus and hyperlipemia, tobacco and alcohol use, type of paresis, consciousness  
27  
28  
29 levels and clinical outcome 30 days after the onset.

30  
31 For the purpose of this entry, we used the following definitions.

- 32  
33  
34  
35 1) Systolic and diastolic hypertension: blood pressure exceeding 140 and 90 mmHg,  
36  
37  
38 2) Arrhythmia: any types of irregularity,  
39  
40  
41 3) Diabetes mellitus: both type 1 and type 2 based on the patient medical record,  
42  
43  
44 4) Hyperlipemia: serum cholesterol level of 220 mg/dl or higher and/or triglyceride  
45  
46  
47 exceeding 150mg/dl,  
48  
49  
50 5) Smoking: divided into four categories, non smokers, and former smokers for more  
51  
52  
53 than a year, light smokers with 20 or less cigarettes a day and heavy smokers with  
54  
55  
56 more than 20 cigarettes a day.  
57  
58  
59  
60

- 1  
2  
3  
4  
5  
6 6) Alcohol consumption: divided into three categories, non drinkers, occasional  
7  
8  
9 drinkers (less than three time a week), and daily drinkers (more than four times a  
10  
11  
12 week).
- 13  
14 7) Paresis: any distribution including unilateral or bilateral limb or face,  
15  
16  
17 8) Consciousness levels onset based on the Japan Coma Scale (JCS)<sup>9 10</sup>, the most  
18  
19  
20 widely used Japanese scale composed of the four levels,  
21  
22  
23 1; JSC 0 (alert),  
24  
25  
26 2; JCS 1-digit code (disoriented but awake),  
27  
28  
29 3; JCS 2-digit code (arousable with stimulation),  
30  
31  
32 4; JSC 3-digit code (unarousable)  
33  
34  
35  
36  
37

### 38 *Statistical Analysis*

39  
40  
41  
42  
43 Statistical analyses used include Fisher exact tests for frequencies of listed  
44  
45  
46 characteristics among the three stroke types, Student-t test for such numerical variables  
47  
48  
49 as age and systolic- and diastolic-blood pressures, a log-rank test for Kaplan-Meier  
50  
51  
52 curves of estimated survival. Cox proportional hazards regression was used to calculate  
53  
54  
55 age-, sex-, systolic and diastolic blood pressure-, and consciousness levels-adjusted  
56  
57  
58  
59  
60

1  
2  
3  
4  
5  
6 hazard ratios and their 95% confidence intervals for the risk of death. Analyses were  
7  
8  
9 performed using SPSS ver.19 and statistical significance was set at  $p < 0.05$ . All reported  
10  
11  
12 p values are 2-sided.

### 13 14 15 16 17 18 ***Ethics Statement***

19  
20  
21 This research was performed in accordance with the ethical principles for medical  
22  
23  
24 research involving human subjects outlined in the Declaration of Helsinki. This research  
25  
26  
27 was approved by the Board of Directors, the Kyoto Medical Association, the  
28  
29  
30 Department of Health and Welfare, Kyoto Prefecture and Ethics Committee of the  
31  
32  
33 National Hospital Organization, Minami Kyoto Hospital. Since all identifying personal  
34  
35  
36 information was stripped from the secondary files before analysis, the boards waived  
37  
38  
39 the requirement for written informed consent from the patients involved.

### 40 41 42 43 44 45 46 **Results**

47  
48  
49 We reviewed 14,268 stroke patients newly identified in Kyoto prefecture from  
50  
51  
52 January 1999 to December 2009. Of these 12,774 (89.5%), 9232 (64.7%), 2504 (17.5%),  
53  
54  
55 and 342 (2.4%) underwent CT, MRI scan, angiography, and scintigraphy for blood flow.  
56  
57  
58  
59  
60

Excluding 480 (3.3%) unclassified patients, 13,788 (96.6%) patients formed the basis of further analyses dividing them into three subtypes of stroke, CI, CH, and SAH categories.

The study cohort had 13,788 patients divided into 9011 (65.4%) CI, 3549 (25.7%) CH and 1197 (8.7%) SAH. A small number of patients had a combination of stroke types as follows: 12 with CI and CH, 4 with CI and SAH, and 15 with CH and SAH. Table 1 summarizes the characteristics, risk factors, symptoms, and mortality rate.

Table 1 Characteristics of Stroke Patients (n=13788)

|                                          | <b>Overall<br/>n=13788</b> | <b>Cerebral<br/>Infarction<br/>n=9011<br/>(65.4%)</b> | <b>Cerebral<br/>Hemorrhage<br/>n=3549<br/>(25.7%)</b> | <b>Subarachnoid<br/>Hemorrhage<br/>n=1197<br/>(8.7%)</b> |
|------------------------------------------|----------------------------|-------------------------------------------------------|-------------------------------------------------------|----------------------------------------------------------|
| <b>Age (SD)</b>                          | 71.3 (12.9)                | 73.3<br>(11.8) <sup>*1*3</sup>                        | 69.1 (13.6)<br><sup>*1*2</sup>                        | 62.7 (13.5) <sup>*2*3</sup>                              |
| <b>Sex, % female<br/>(n=female/male)</b> | 45.2 (6233/7555)           | 42.3 <sup>*1*3</sup><br>(3815/5196)                   | 45.9 <sup>*1*2</sup><br>(1630/1919)                   | 64.6 <sup>*2*3</sup><br>(773/424)                        |
| <b>Systolic blood<br/>pressure (SD)</b>  | 161.3 (35.5)               | 157.5 (28.3) <sup>*1</sup>                            | 172.1 (34.8)<br><sup>*1*2</sup>                       | 157.9 (37.0) <sup>*2</sup>                               |

|                                                      |                   |                                  |                                  |                                |
|------------------------------------------------------|-------------------|----------------------------------|----------------------------------|--------------------------------|
| <b>Diastolic blood pressure (SD)</b>                 | 87.6 (18.63)      | 85.6 (17.0)                      | 93.1 (21.1)                      | 86.8 (21.8) <sup>*2*3</sup>    |
|                                                      |                   | <sup>*1*3</sup>                  | <sup>*1*2</sup>                  |                                |
| <b>Hypertension history, % (n=with/without)</b>      | 62.6 (8005/4780)  | 62.0 <sup>*1*3</sup> (5285/3242) | 68.5 <sup>*1*2</sup> (2183/1006) | 49.9 <sup>*2*3</sup> (520/522) |
| <b>Arrhythmia, % (n=with/without)</b>                | 14.5 (1932/11352) | 18.9 <sup>*1*3</sup> (1647/7064) | 5.9 <sup>*1*2</sup> (200/3209)   | 7.2 <sup>*2*3</sup> (82/1052)  |
| <b>Arrhythmia history, % (n=with/without)</b>        | 18.5(2357/10415)  | 24.3 <sup>*1*3</sup> (2060/6432) | 7.5 <sup>*1*2</sup> (240/2971)   | 5.3 <sup>*2*3</sup> (55/985)   |
| <b>Diabetes mellitus history, % (n=with/without)</b> | 20.9 (2689/10198) | 24.8 <sup>*1*3</sup> (2138/6475) | 14.8 <sup>*1*2</sup> (474/2738)  | 6.9 <sup>*2*3</sup> (71/963)   |
| <b>Hyperlipemia history, % (n=with/without)</b>      | 19.2 (2419/10198) | 23.1 <sup>*1*3</sup> (1951/6503) | 11.9 <sup>*1*2</sup> (371/2755)  | 9.2 <sup>*2*3</sup> (93/918)   |
| <b>Tobacco</b>                                       | 32.4 (3665/7642)  | 32.6 <sup>*1*3</sup>             | 30.1 <sup>*1*2</sup>             | 37.1 <sup>*2*3</sup>           |

|  |                                          |                  |                             |                            |
|--|------------------------------------------|------------------|-----------------------------|----------------------------|
|  | <b>usage, %</b>                          | (2455/5077)      | (843/1956)                  | (354/599)                  |
|  | <b>(n=with/without)</b>                  |                  |                             |                            |
|  | <b>Non smoker, % (n)</b>                 | 67.6 (7642)      | 67.4 (5077) <sup>*3</sup>   | 69.9 (1956) <sup>*2</sup>  |
|  | <b>Former smoker, % (n)</b>              | 5.4 (615)        | 5.8 (435) <sup>*3</sup>     | 5.7 (159) <sup>*2</sup>    |
|  | <b>Light smoker, % (n)</b>               | 17.0 (1918)      | 17.0 (1281) <sup>*1*3</sup> | 14.6 (409) <sup>*1*2</sup> |
|  | <b>Heavy smoker, % (n)</b>               | 10.0 (1132)      | 9.8 (739)                   | 9.8 (275)                  |
|  | <b>Alcohol usage, % (n=with/without)</b> | 38.0 (4202/6851) | 36.3 <sup>*1*3</sup>        | 40.5 <sup>*1*2</sup>       |
|  | <b>Non drinker, % (n)</b>                | 62.0 (6851)      | 63.7 (4655) <sup>*1*3</sup> | 59.5 (1650) <sup>*1</sup>  |
|  | <b>Occasional drinker, % (n)</b>         | 15.3 (1692)      | 15.5 (1131) <sup>*1*3</sup> | 13.5 (374) <sup>*1*2</sup> |
|  | <b>Every day drinker, % (n)</b>          | 22.7 (2510)      | 20.8 (1523) <sup>*1*3</sup> | 27.0 (750) <sup>*1</sup>   |
|  | <b>Alcohol usage, % (n=with/without)</b> |                  |                             |                            |
|  | <b>Non drinker, % (n)</b>                |                  |                             |                            |
|  | <b>Occasional drinker, % (n)</b>         |                  |                             |                            |
|  | <b>Every day drinker, % (n)</b>          |                  |                             |                            |

|                                     |                  |                             |                             |                             |
|-------------------------------------|------------------|-----------------------------|-----------------------------|-----------------------------|
| <b>Paresis, %</b>                   | 73.3 (9670/3525) | 76.8 <sup>*1*3</sup>        | 78.5 <sup>*1*2</sup>        | 26.8 <sup>*2*3</sup> (73.2) |
| <b>(n=with/without)</b>             |                  | (6750/2041)                 | (2624/717)                  |                             |
| <b>Consciousness disturbance, %</b> | 43.5 (5914/7676) | 31.8 <sup>*1*3</sup>        | 65.7 <sup>*1</sup>          | 65.1 <sup>*3</sup>          |
| <b>(n=with/without)</b>             |                  | (2815/8863)                 | (2305/1201)                 | (775/415)                   |
| <b>JCS 0, % (n)</b>                 | 55.7 (7676)      | 67.1 <sup>*1*3</sup> (6048) | 33.8 <sup>*1*2</sup> (1201) | 35.6 <sup>*2*3</sup> (415)  |
| <b>JSC 1-digit code, % (n)</b>      | 19.0 (2619)      | 16.7 <sup>*1</sup> (1508)   | 26.0 <sup>*1*2</sup> (921)  | 15.9 <sup>*2</sup> (185)    |
| <b>JSC 2-digit code, % (n)</b>      | 11.6 (1602)      | 8.6 <sup>*1*3</sup> (774)   | 17.5 <sup>*1</sup> (622)    | 16.7 <sup>*3</sup> (200)    |
| <b>JSC 3-digit code, % (n)</b>      | 10.9 (1509)      | 4.7 <sup>*1*3</sup> (421)   | 20.2 <sup>*1*2</sup> (716)  | 30.5 <sup>*2*3</sup> (365)  |
| <b>JSC undetermined, % (n)</b>      | 1.3 (184)        | 1.2 <sup>*3</sup> (112)     | 1.3 <sup>*2</sup> (46)      | 2.1 <sup>*2*3</sup> (25)    |
| <b>Mortality, %</b>                 | 9.8 (1344/12391) | 5.2 <sup>*1*3</sup>         | 15.2 <sup>*1*2</sup>        | 28.4 <sup>*2*3</sup>        |
| <b>(n=dead/alive)</b>               |                  | (467/8981)                  | (536/2997)                  | (338/853)                   |

1  
2  
3  
4  
5  
6 When the numbers entered in the above table are significantly different statistically  
7  
8  
9 between different types of strokes, they are marked as follows:

10  
11 \*1: significant difference between Cerebral Infarction and Cerebral Hemorrhage;

12  
13  
14 \*2: sig. difference between Cerebral Hemorrhage and Subarachnoid Hemorrhage;

15  
16  
17 \*3: sig. difference between Subarachnoid Hemorrhage and Cerebral Infarction;

18  
19  
20 SD = Standard Deviation  
21  
22  
23  
24  
25  
26  
27  
28

29 Table 1 also shows historical account on hypertension in 12,785 (92.7%), arrhythmia in  
30  
31 12,772 (92.6%), diabetes mellitus in 12,887 (93.5%), hyperlipemia in 12,617 (91.5%),  
32  
33 tobacco usage in 11,307 (82.0%), alcohol usage in 11,053 (80.2%), and paresis in  
34  
35 13,195 (96.7%). We were able to classify 13,406 (97.2%) patients into four  
36  
37 consciousness levels, excluding 184 (1.3%) patients with uncategorized stroke and 580  
38  
39 (4.2%) patients with no reliable information on conscious levels. Calculation of the  
40  
41 mean delay time excluded 4964 (36.0%) patients of unknown onset. Patients received  
42  
43 primary medical care within 3 hours of CI in 54.3%, of CH in 68.5% in CH, and of  
44  
45 SAH in 76.4%.  
46  
47  
48  
49  
50  
51  
52  
53  
54  
55  
56  
57  
58  
59  
60



Of 13,788 patients, 13,735 (99.6%) had a confirmed record of survival or death 30 days after stroke onset. A total of 1344 (9.8%) patients died within this time period.

Figure 1 shows Kaplan-Meier Survival curves, comparing stroke subtypes, showing a significant difference ( $p < 0.001$ ) between any two subtypes based on Log-rank tests.

Compared to CI, CH and SAH hazard ratios for fatality of 1.446 (1.255-1.667), and 2.287 (1.922-2.722)  $p < 0.001$ , when adjusted for age, sex, systolic and diastolic blood pressures and consciousness levels, showing significant differences ( $p < 0.001$ ) (Table 2).

Table 2 Hazard ratios for death, comparing stroke subtypes, adjusted to age, sex, systolic and diastolic blood pressures and consciousness levels

|                                | Hazard Ratio | 95% Confidence |       | p      |
|--------------------------------|--------------|----------------|-------|--------|
|                                |              | Intervals      |       |        |
|                                |              | Lower          | Upper |        |
| <b>Cerebral Infarction</b>     |              | Reference      |       |        |
| <b>Cerebral Hemorrhage</b>     | 1.446        | 1.255          | 1.667 | <0.001 |
| <b>Subarachnoid Hemorrhage</b> | 2.287        | 1.922          | 2.722 | <0.001 |

## Discussion

The study summarized the stroke registry covering entire prefecture for 11 years. Such data set depends on the society and the times. More than 100 hospitals affiliated to the Kyoto Medical Association, virtually all major hospitals in the prefecture, registered all new stroke patients based on the inclusion and exclusion criteria in accordance with the Kyoto municipal ordinance, avoiding area or hospitals preferences.

The two major findings are as follows:

First, we calculated hazard ratios for death was highest in SAH, followed by CH and lowest in CI as shown in Table 2.

Second, the study clarified characteristics, risk factors, paresis, depth of consciousness impairment and delay time among three subtypes as summarized in Table 1.

Our study is based on the very large number of stroke patients, which allows for sufficient statistical power.

1  
2  
3  
4  
5  
6 In agree with previous reports, CI showed higher incidence followed by CH  
7  
8  
9 and SAH, which constitutes a fourth of hemorrhagic strokes<sup>11</sup>. The result adds the  
10  
11 information that SAH constitutes about a fourth of hemorrhagic strokes. Age  
12  
13 distribution also confirm the result of previous reports, the oldest mean age in CH and  
14  
15 youngest in SAH<sup>12</sup>. The elderly patients showed a greater difference in proportion in  
16  
17 stroke subtypes. For example, in patients who were 71 years or older, the proportions  
18  
19 were 73.1% (n=5616), 22.3% (n=1709), and 4.6% (n=353), as compared to younger  
20  
21 group who showed 55.8% (n=3395), 30.3% (n=1840) and 13.9% (n=844).  
22  
23  
24  
25  
26  
27  
28

29 Most of the other characteristics also showed significant difference among  
30  
31 three stroke subtypes. The overall registry had more male patients than female, except  
32  
33 almost two-thirds of SAH cases were female. The initial medical examination revealed  
34  
35 higher systolic and diastolic blood pressures in CH than in CI, possibly reflecting  
36  
37 intracranial mass effect on brain edema<sup>13 14</sup>.  
38  
39  
40  
41  
42  
43

44 Patients with disturbed consciousness had a higher ( $p < 0.001$ ) systolic/diastolic  
45  
46 blood pressure (mean  $\pm$  SD:  $164.0 \pm 35.2/88.6 \pm 20.9$ ) than the remainder ( $159.3 \pm$   
47  
48  $28.2/87.0 \pm 17.1$ ), implying possible association between stroke severity and degree of  
49  
50 hypertension.  
51  
52  
53  
54  
55  
56  
57  
58  
59  
60

1  
2  
3  
4  
5  
6 Risk factors for stroke include hypertension <sup>15</sup>, arrhythmia <sup>16</sup>, diabetes mellitus  
7  
8  
9 <sup>17 18</sup>, hyperlipemia <sup>19</sup>, alcohol usage <sup>20 21</sup>, and tobacco usage . Except for tobacco and  
10  
11 alcohol usage, most often seen in SAH, these factors were noted most often seen in CI,  
12  
13 followed by CH, and least in SAH. Hypertension, probably plays the most important  
14  
15 role, was found in more than 60 % of all stroke patients. A history of arrhythmia and  
16  
17 diabetes mellitus, relatively high in CI and lower in CH, was rarely found in SAH.  
18  
19  
20 These data suggest a limited association between these three factors and hemorrhagic  
21  
22 strokes. The Ministry of Health, Labour and Welfare of Japan, has estimated morbidity  
23  
24 rates of hypertension diabetes mellitus and hyperlipemia among Japanese aged from 40  
25  
26 to 74 as 49.9%, 11.4%, and 17.7%. In our series, a history of hypertension exceeded this  
27  
28 estimate in CI and CH. A history of diabetes mellitus was higher in CI and CH, but  
29  
30 lower in SAH, suggesting that this may not be a risk factor in SAH. A history of  
31  
32 hyperlipemia was also lower in SAH than the morbidity rate, also suggesting that this  
33  
34 may not a risk factor in SAH.  
35  
36  
37  
38  
39  
40  
41  
42  
43  
44  
45

46 Alcohol and tobacco usage showed a higher correlation to SAH than the other  
47  
48 types in the surveillance conducted under the same conditions for the three subtypes of  
49  
50 stroke. Alcohol and tobacco usage may therefore increase the risk of SAH more than CI  
51  
52 or CH.  
53  
54  
55  
56  
57  
58  
59  
60

1  
2  
3  
4  
5  
6 The proportion of heavy smokers was not different among stroke subtypes,  
7  
8  
9 whereas the proportion of every day drinkers was higher in hemorrhagic strokes than in  
10  
11  
12 ischemic stroke. Paresis developed more often in CI and CH compared to SAH.  
13  
14  
15 Hemorrhagic stroke caused consciousness disturbance more than ischemic stroke.  
16

17  
18 We calculated mortality based on the information up to 30 days after the stroke  
19  
20  
21 event, excluding those who died later. Early mortality indicates stroke events  
22  
23  
24 themselves, whereas long term mortality reflects aftereffects and complications. Thus,  
25  
26  
27 early mortality serves well to evaluate the severity of the three major stroke subtypes.  
28  
29  
30 Death in the first month after stroke mainly results from neurological causes such as  
31  
32 brain edema<sup>22</sup>, followed by complications of immobility including pneumonia<sup>23</sup>.  
33  
34  
35  
36  
37

### 38 ***Limitations***

- 39  
40 1) There may be missing data for stroke patients; for example, patients who died  
41  
42  
43 before arriving to hospitals and patients who went to hospital outside of the  
44  
45  
46 prefecture. Patients with mild symptoms might not have visited hospitals and  
47  
48  
49 patients with atypical symptoms might not have been diagnosed as such, and  
50  
51  
52 subsequently might not have been registered<sup>5</sup>.  
53  
54  
55  
56  
57  
58  
59  
60

- 1  
2  
3  
4  
5  
6 2) The study did not encompass the effects of therapeutic interventions, which must  
7  
8  
9 have affected on mortality. It is virtually impossible to adjust all the treatments in a  
10  
11 very large population based study. Treatments should be studied in randomized  
12  
13 controlled studies. The causes of death in the study cohort were not investigated  
14  
15 either. Possible bias exists in the assessment of variables, such as history of habits,  
16  
17 which largely depend on patients' self report or information from their families. The  
18  
19 study, however, showed the overall characteristics and mortality in stroke and in  
20  
21 major subtypes, which should shed light on the difference among the major subtypes  
22  
23 as a whole, since the comparison was done otherwise in the same condition.  
24  
25  
26  
27  
28  
29  
30  
31  
32 3) The outcomes assessment limited to 30 days after onset leaves the majority of  
33  
34 patients (n=11869, 86.1%) who survived the first month out of consideration.  
35  
36  
37 However, early mortality evaluation within 30-day should reflect cause of death  
38  
39 directly associated with stroke and therefore correlate severity in more direct way.  
40  
41  
42  
43  
44  
45  
46  
47  
48  
49  
50  
51  
52  
53  
54

55 Major conclusions of the study should prevail as a report based on a very large number  
56  
57 of patients analyzed under the same conditions.  
58  
59  
60

### ***Conclusion***

1  
2  
3  
4  
5  
6 We have presented population based data for the span of 11 years covering the entire  
7  
8  
9 Kyoto prefecture in Japan. Among stroke major subtypes, hazard ratio for death was  
10  
11  
12 highest in SAH, followed by CH and lowest in CI.  
13

### 14 15 16 17 18 **Acknowledgments**

19  
20 We acknowledge the contribution of participating institutions and their staffs who  
21  
22  
23 provided data in the development of the Kyoto Stroke Registry.  
24  
25  
26  
27

### 28 29 **Figure Legends**

30  
31  
32 Kaplan-Meier survival curves of stroke patients  
33  
34  
35  
36  
37  
38  
39  
40  
41  
42  
43  
44  
45  
46  
47  
48  
49  
50  
51  
52  
53  
54  
55  
56  
57  
58  
59  
60

## References

1. Turin TC, Kokubo Y, Murakami Y, et al. Lifetime risk of acute myocardial infarction in Japan. *Circulation*. 2010;3(6):701-3.
2. Scarborough P, Morgan RD, Webster P, et al. Differences in coronary heart disease, stroke and cancer mortality rates between England, Wales, Scotland and Northern Ireland: the role of diet and nutrition. *BMJ open* 2011;1(1):e000263.
3. Lee S, Shafe AC, Cowie MR. UK stroke incidence, mortality and cardiovascular risk management 1999-2008: time-trend analysis from the General Practice Research Database. *BMJ open* 2011;1(2):e000269.
4. Anderson GL, Whisnant JP. A comparison of trends in mortality from stroke in the United States and Rochester, Minnesota. *Stroke*: 1982;13(6):804-9.
5. Shigematsu K, Shimamura O, Nakano H, et al. Vomiting should be a prompt predictor of stroke outcome. *Emergency medicine journal : EMJ* 2012.
6. Hatano S. Experience from a multicentre stroke register: a preliminary report. *Bulletin of the World Health Organization* 1976;54(5):541-53.
7. *International Classification of Diseases, Ninth Revision, Clinical Modification*. Washington, DC: US Department of Health and Human Service. 1988.
8. Steindel SJ. International classification of diseases, 10th edition, clinical modification and procedure coding system: descriptive overview of the next generation HIPAA code sets. *Journal of the American Medical Informatics Association : JAMIA* 2010;17(3):274-82.
9. Ohta T, Waga S, Handa W, Saito I, et al. [New grading of level of disordered consciousness (author's transl)]. *No shinkei geka. Neurological surgery* 1974;2(9):623-7.
10. Ohta T, Kikuchi H, Hashi K, et al. Nizofenone administration in the acute stage following subarachnoid hemorrhage. Results of a multi-center controlled double-blind clinical study. *Journal of neurosurgery* 1986;64(3):420-6.
11. Kiyohara Y, Kubo M, Kato I, et al. Ten-year prognosis of stroke and risk factors for death in a Japanese community: the Hisayama study. *Stroke* 2003;34(10):2343-7.
12. Tanaka H, Ueda Y, Hayashi M, et al. Risk factors for cerebral hemorrhage and cerebral infarction in a Japanese rural community. *Stroke*; 1982;13(1):62-73.



13. Hacke W, Schwab S, Horn M, et al. 'Malignant' middle cerebral artery territory infarction: clinical course and prognostic signs. *Archives of neurology* 1996;53(4):309-15.
14. Klatzo I. Brain oedema following brain ischaemia and the influence of therapy. *British journal of anaesthesia* 1985;57(1):18-22.
15. Collins R, Peto R, MacMahon S, et al. Blood pressure, stroke, and coronary heart disease. Part 2, Short-term reductions in blood pressure: overview of randomised drug trials in their epidemiological context. *Lancet* 1990;335(8693):827-38.
16. Wolf PA, Abbott RD, Kannel WB. Atrial fibrillation as an independent risk factor for stroke: the Framingham Study. *Stroke* 1991;22(8):983-8.
17. Abbott RD, Donahue RP, MacMahon SW, et al. Diabetes and the risk of stroke. The Honolulu Heart Program. *JAMA* 1987;257(7):949-52.
18. Wolf PA, D'Agostino RB, Belanger AJ, et al. Probability of stroke: a risk profile from the Framingham Study. *Stroke*; 1991;22(3):312-8.
19. Iso H, Jacobs DR, Jr., Wentworth D, et al. Serum cholesterol levels and six-year mortality from stroke in 350,977 men screened for the multiple risk factor intervention trial. *The New England journal of medicine* 1989;320(14):904-10.
20. Bazzano LA, Gu D, Reynolds K, et al. Alcohol consumption and risk for stroke among Chinese men. *Annals of neurology* 2007;62(6):569-78.
21. Djousse L, Ellison RC, Beiser A, et al. Alcohol consumption and risk of ischemic stroke: The Framingham Study. *Stroke* 2002;33(4):907-12.
22. Balami JS, Chen RL, Grunwald IQ, et al. Neurological complications of acute ischaemic stroke. *Lancet neurology* 2011;10(4):357-71.
23. Lavados PM, Sacks C, Prina L, et al. Incidence, 30-day case-fatality rate, and prognosis of stroke in Iquique, Chile: a 2-year community-based prospective study (PISCIS project). *Lancet* 2005;365(9478):2206-15.

1  
2  
3  
4  
5  
6  
7  
8  
9  
10  
11  
12  
13  
14  
15  
16  
17  
18  
19  
20  
21  
22  
23  
24  
25  
26  
27  
28  
29  
30  
31  
32  
33  
34  
35  
36  
37  
38  
39  
40  
41  
42  
43  
44  
45  
46  
47  
48  
49  
50  
51  
52  
53  
54  
55  
56  
57  
58  
59  
60

Figure Kaplan-Meier Survival Curves of stroke patients

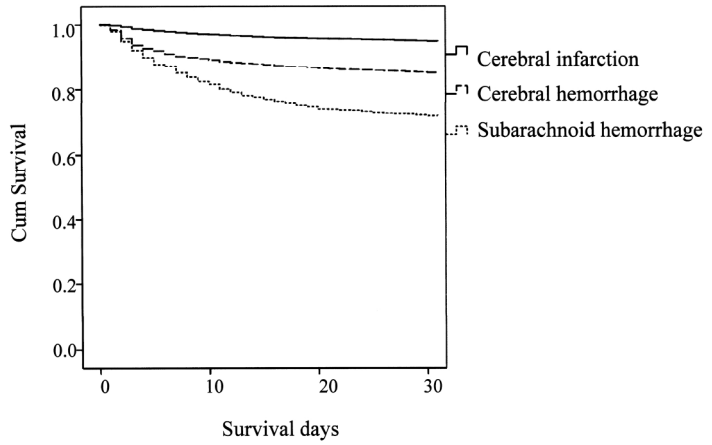

Kaplan-Meier survival curves of stroke patients  
215x156mm (300 x 300 DPI)

View only



## Characteristics, risk factors and mortality of stroke patients in Kyoto, Japan

|                                 |                                                                                                                                                                                                                                                                                                                                                                                                                                                                                                                                                                                                                                                                                                                                                                                    |
|---------------------------------|------------------------------------------------------------------------------------------------------------------------------------------------------------------------------------------------------------------------------------------------------------------------------------------------------------------------------------------------------------------------------------------------------------------------------------------------------------------------------------------------------------------------------------------------------------------------------------------------------------------------------------------------------------------------------------------------------------------------------------------------------------------------------------|
| Journal:                        | <i>BMJ Open</i>                                                                                                                                                                                                                                                                                                                                                                                                                                                                                                                                                                                                                                                                                                                                                                    |
| Manuscript ID:                  | bmjopen-2012-002181.R1                                                                                                                                                                                                                                                                                                                                                                                                                                                                                                                                                                                                                                                                                                                                                             |
| Article Type:                   | Research                                                                                                                                                                                                                                                                                                                                                                                                                                                                                                                                                                                                                                                                                                                                                                           |
| Date Submitted by the Author:   | 02-Jan-2013                                                                                                                                                                                                                                                                                                                                                                                                                                                                                                                                                                                                                                                                                                                                                                        |
| Complete List of Authors:       | Shigematsu, Kazuo; National Hospital Organization, Minami Kyoto Hospital, Neurology<br>Nakano, Hiromi; Kyoto Kidugawa Hospital, Neurosurgery<br>Watanabe, Yoshiyuki; Kyoto Prefectural University of Medicine, Graduate School of Medical Science, Epidemiology for Community Health and Medicine<br>Sekimoto, Tatsuyuki; Kyoto Prefectural Yosanoumi Hospital, Neurosurgery<br>Shimizu, Kouichiro; Kyoto Fushimi Shimizu Hospital, Neurosurgery<br>Nishizawa, Akihiko; The Nishizawa Clinic, Internal Medicine<br>Makino, Masahiro; Japanese Red Cross Kyoto Daini Hospital, Neurology<br>Okumura, Atsushi; Kyoto Jujo Rehabilitation Hospital, Neurosurgery<br>Bando, Kazuhiko; The Bando Clinic, Internal Medicine<br>Kitagawa, Yasushi; The Kitagawa Clinic, Internal Medicine |
| <b>Primary Subject Heading</b>: | Public health                                                                                                                                                                                                                                                                                                                                                                                                                                                                                                                                                                                                                                                                                                                                                                      |
| Secondary Subject Heading:      | Public health, Health informatics, Epidemiology                                                                                                                                                                                                                                                                                                                                                                                                                                                                                                                                                                                                                                                                                                                                    |
| Keywords:                       | PUBLIC HEALTH, EPIDEMIOLOGY, STROKE MEDICINE                                                                                                                                                                                                                                                                                                                                                                                                                                                                                                                                                                                                                                                                                                                                       |
|                                 |                                                                                                                                                                                                                                                                                                                                                                                                                                                                                                                                                                                                                                                                                                                                                                                    |

SCHOLARONE™  
Manuscripts

1  
2  
3  
4  
5  
6 Characteristics, risk factors and mortality of stroke patients in Kyoto, Japan  
7  
8  
9

10  
11 **Short title:** Characteristics, risk factors and mortality of Stroke  
12  
13

14  
15  
16  
17 Kazuo Shigematsu<sup>1</sup>, Hiromi Nakano<sup>2</sup>, Yoshiyuki Watanabe<sup>3</sup>, Tatsuyuki Sekimoto<sup>4</sup>,  
18 Kouichiro Shimizu<sup>5</sup>, Akihiko Nishizawa<sup>6</sup>, Masahiro Makino<sup>7</sup>, Atsushi Okumura<sup>8</sup>,  
19 Kazuhiko Bando<sup>9</sup>, Yasushi Kitagawa<sup>10</sup>  
20  
21  
22  
23  
24  
25  
26

27 From: <sup>1</sup>National Hospital Organization, Minami Kyoto Hospital, <sup>2</sup>Kyoto Kidugawa  
28 Hospital, <sup>3</sup>Kyoto Prefectural University of Medicine, <sup>4</sup>Kyoto Yosanoumi Hospital,  
29  
30  
31  
32  
33 <sup>5</sup>Kyoto Fushimi Shimizu Hospital, <sup>6</sup>The Nishizawa Clinic, <sup>7</sup>Japanese Red Cross Kyoto  
34  
35  
36 Daini Hospital, <sup>8</sup>Jujoyo Rehabilitation Hospital, <sup>9</sup>The Bando Clinic, <sup>10</sup>The Kitagawa  
37  
38  
39 Clinic.  
40  
41  
42

43 Correspondence to Kazuo Shigematsu, MD  
44

45  
46 Department of Neurology, the National Hospital Organization, Minami Kyoto Hospital  
47

48  
49 11 Nakaashihara, Jouyou-shi, Kyoto, Japan, 610-0113  
50

51  
52 Phone 81-774-52-0065, Fax 81-774-55-2765, E-mail neuron.k07@gmail.com  
53  
54  
55  
56  
57  
58  
59  
60

1  
2  
3  
4  
5  
6 **Keywords:** epidemiology, public health, stroke medicine  
7

8  
9 **Contributorship:** All authors equally contributed to this study  
10

11 **Funding:** none  
12

13 **Competing interests:** none  
14  
15  
16  
17  
18  
19  
20  
21  
22  
23  
24  
25  
26  
27  
28  
29  
30  
31  
32  
33  
34  
35  
36  
37  
38  
39  
40  
41  
42  
43  
44  
45  
46  
47  
48  
49  
50  
51  
52  
53  
54  
55  
56  
57  
58  
59  
60

## *Article Summary*

### **Article focus**

We examined the characteristics, risk factors and outcome of contemporary stroke patients based on the Kyoto Stroke Registry for recent 11 years. The study cohort has 12,774 cerebral infarction (CI), 9,232 cerebral hemorrhage (CH) and 2,540 subarachnoid hemorrhage (SAH) patients.

### **Key messages**

About two thirds of patients have hypertension history, whereas only about one fifth have histories of arrhythmia, diabetes mellitus and hyperlipemia. The prevalence of risk factors was different among stroke subtypes.

Mortality on 30 days after the onset is 5.2% in CI, 15.2% in CH and 28.4% in SAH.

Hazard ratios for death adjusted for age, sex, histories of hypertension, arrhythmia, diabetes mellitus and hyperlipemia and uses of tobacco and alcohol, showed a significant ( $P < 0.001$ ) difference among CI (a reference), CH (3.66; 3.07-4.37) and SAH (8.91; 27.18-11.06).

### **Strengths and limitations of this study**

1  
2  
3  
4  
5  
6 This study provided quantitative data on fundamentals of contemporary stroke in a very  
7  
8  
9 large cohort in Kyoto Prefecture, Japan.  
10

11  
12 Detailed information on size and localization of stroke and on treatment and  
13  
14 complication was not available in this population based study.  
15  
16  
17  
18  
19  
20  
21  
22  
23  
24  
25  
26  
27  
28  
29  
30  
31  
32  
33  
34  
35  
36  
37  
38  
39  
40  
41  
42  
43  
44  
45  
46  
47  
48  
49  
50  
51  
52  
53  
54  
55  
56  
57  
58  
59  
60

1  
2  
3  
4  
5  
6 **Objectives:** The aim of the study is to evaluate characteristics, risk factors and outcome  
7  
8  
9 of recent stroke patients in Kyoto Japan.

10  
11  
12 **Design:** We analyzed stroke patients in the registry with regard to their characteristics,  
13  
14 risk factors, and mortality. Cox proportional hazards regression was used to calculate  
15  
16 adjusted hazard ratios for death.  
17  
18  
19

20  
21  
22 **Settings:** The Kyoto prefecture of Japan has established a registry to enroll new stroke  
23  
24 patients in cooperation with the Kyoto Medical Association and its affiliated hospitals  
25  
26  
27  
28

29  
30  
31 **Participants:** The registry now has data on 14,268 patients enrolled from January 1,  
32  
33 1999 to December 31, 2009. Of these 12,774 (89.5%), 9,232 (64.7%), 2,504 (17.5%),  
34  
35 and 342 (2.4%) underwent CT, MRI, angiography, and scintigraphy. Excluding 480  
36  
37 (3.3%) unclassified patients, 13,788 (96.6%) patients formed the basis of further  
38  
39 analyses divided then into three subtypes of stroke, cerebral infarction (CI), cerebral  
40  
41 hemorrhage (CH), and subarachnoid hemorrhage (SAH).  
42  
43  
44  
45  
46  
47  
48  
49

50  
51  
52 **Results:** A total of 13,788 confirmed stroke patients in the study cohort comprised  
53  
54 9,011 (86.3%) CI, 3,549 (25.7%) CH and 1,197 (8.7%) SAH cases. The mean age was  
55  
56  
57  
58  
59  
60



1  
2  
3  
4  
5  
6 73.3 ± 11.8, 69.1 ± 13.6 and 62.7 ± 13.5 in the CI, CH and SAH cases, respectively. In  
7  
8  
9 the CI and CH cases, males were predominant, whereas in the SAH cases, females were  
10  
11 predominant. Frequencies of risk factors were different among the subtypes. Mortality  
12  
13 was worst in the SAH, followed by the CH, and least in the CI. Hazard ratios for death  
14  
15 adjusted for age, sex, histories of hypertension, arrhythmia, diabetes mellitus and  
16  
17 hyperlipemia and uses of tobacco and alcohol, showed a significant (P<0.001)  
18  
19 difference among CI (a reference), CH (3.66; 3.07-4.37) and SAH (8.91; 27.18-11.06).  
20  
21  
22  
23  
24  
25  
26  
27  
28  
29

30 **Conclusions:** Characteristics, risk factors, and mortality were evaluated in a  
31  
32 quantitative manner in a large Japanese study cohort to shed light on the present status  
33  
34 of stroke medicine.  
35  
36  
37  
38  
39  
40  
41  
42  
43  
44  
45  
46  
47  
48  
49  
50  
51  
52  
53  
54  
55  
56  
57  
58  
59  
60

## Introduction

Stroke, the third major cause of death, constitutes the largest cause of acquired disability in Japan [1]. According to a report of the Ministry of Health, Labor and Welfare, about 123,400 people died from stroke in 2010. About 10.3% of the total national death resulted from stroke. Sustained exposure to risk factors associated with lifestyle which patients live in play an important role in stroke incidence. Stroke is regarded as one of the diseases developed by long lasting exposure to risk factors associated with lifestyle. The incidence, as well as mortality, should be greatly affected by society, regions and times [2 3]. The updated detailed information on stroke events in each society is required. A long-term surveillance of stroke, comparing characteristics, risk factors, and mortality, based on the entire population in a prefecture as large as Kyoto, which has about 2,630,000 residents, should provide a fundamental database of stroke. Stroke consists of three major distinct subtypes, namely, cerebral infarction (CI), cerebral hemorrhage (CH), and subarachnoid hemorrhage (SAH). Although these subtypes, as disorders of the cerebral arteries, have many things in common, distinct characteristics prevail. Quantitative measurement of these differences in the same large cohort should help characterize three stroke subtypes [4]. The strength of comparing

1  
2  
3  
4  
5  
6 these three stroke subtypes in the same large cohort is that, by doing so, we can evaluate  
7  
8  
9 the relative strength of the risk factors influencing each subtype. These data also should  
10  
11  
12 help confirm a higher mortality rate in hemorrhagic stroke than ischemic stroke, and  
13  
14  
15 elucidate hazard ratios for death estimated simultaneously among major stroke subtypes,  
16  
17  
18 which should reflect relative severities of stroke.  
19

20  
21  
22  
23  
24 The Kyoto prefecture of Japan has established a registry to enroll all new  
25  
26  
27 stroke patients in cooperation with the Kyoto Medical Association and its affiliated  
28  
29  
30 hospitals with help from the data collecting agency known as the Kyoto Stroke Registry  
31  
32  
33 (KSR) [5]. We studied all patients registered during the past 11 years in the prefecture of  
34  
35  
36 Kyoto to document characteristics, risk factors, and hazard ratios in the three major  
37  
38  
39 stroke subtypes.  
40  
41  
42  
43  
44

## 45 **Methods**

46  
47  
48  
49  
50 We analyzed all stroke patients identified from January 1999 to December  
51  
52  
53 2009 in the entire Kyoto prefecture and registered in the KSR run by the local  
54  
55  
56 government of Kyoto prefecture. The Kyoto Medical Association distributed the  
57  
58  
59  
60

1  
2  
3  
4  
5  
6 registration forms to the affiliated medical institutions and collected the data. A total of  
7  
8  
9 151 hospitals have registered patients.  
10

11  
12  
13  
14 We supplied the summary of Kyoto Stroke Registry Program in supplementary Table 1  
15

16  
17  
18 A. This summary has been distributed to all hospitals affiliated to the Kyoto Medical  
19  
20  
21 Association and to public health centers in Kyoto Prefecture. It is also attached to the  
22  
23  
24 annual reports published by Kyoto Prefecture.  
25

26  
27  
28  
29 The diagnosis of stroke was confirmed by local neurologists and/or neurosurgeons  
30  
31  
32 based on the WHO definition [6]. Stroke patients who lived in Kyoto prefecture were  
33  
34  
35 registered regardless to their age and sex. Conditions such as shock, Adam-Strokes  
36  
37  
38 Syndrome or hypertensive encephalopathy are excluded as they are not caused directly  
39  
40  
41 by cerebrovascular events. TIA is also excluded as the symptoms cease within 24 hours  
42  
43  
44 after onset. Differential diagnoses are made by attending physicians based on CT/MRI  
45  
46  
47 images and other clinical examinations. Inclusion and exclusion criteria for KSR were  
48  
49  
50 shown in supplementary Table 1B.  
51

52  
53  
54  
55 We classified the patients into CI (ICD-9 code 433 and 434, ICD-10 code I63), CH  
56  
57

1  
2  
3  
4  
5  
6 (ICD-9 code 431, ICD-10 code I61), SAH (ICD-9 code 430, ICD-10 code I60) [7 8] and  
7  
8  
9 others by neurological examination and the findings of CT scans, MRI scans,  
10  
11 angiographies, and scintigraphies. In order to clarify trends over time, we also divided  
12  
13 the study cohort into two groups, Group-A and Group-B, according to the date of onset  
14  
15 of the event. Group-A comprises patients who developed stroke between January 1999  
16  
17 and June 2004, and Group-B comprises patients who developed stroke between July  
18  
19 2004 and December 2009. We showed differences between the two groups and, using  
20  
21 multivariate analyses, calculated hazard ratios for death comparing the two groups.  
22  
23  
24  
25  
26  
27  
28  
29  
30  
31

32 Each registry recorded age, sex, date of stroke onset, blood pressure and arrhythmia on  
33  
34 arrival, history of hypertension, arrhythmia, diabetes mellitus and hyperlipemia, tobacco  
35  
36 and alcohol use, type of paresis, consciousness levels and clinical outcome 30 days after  
37  
38 the onset.  
39  
40  
41  
42

43 For the purpose of this entry, we used the following definitions.  
44

- 45 1) Systolic and diastolic hypertension: blood pressure exceeding 140 and 90 mmHg,  
46  
47
- 48 2) Arrhythmia: any types of irregularity,  
49  
50
- 51 3) Diabetes mellitus: both type 1 and type 2 based on the patient medical record,  
52  
53  
54  
55  
56  
57  
58  
59  
60

- 1  
2  
3  
4  
5  
6 4) Hyperlipemia: serum cholesterol level of 220 mg/dl or higher and/or triglyceride  
7  
8 exceeding 150mg/dl,  
9  
10  
11  
12 5) Smoking: divided into four categories, non smokers, and former smokers for more  
13  
14 than a year, light smokers with 20 or less cigarettes a day and heavy smokers with  
15  
16 more than 20 cigarettes a day.  
17  
18  
19  
20  
21 6) Alcohol consumption: divided into three categories, non drinkers, occasional  
22  
23 drinkers (less than three time a week), and daily drinkers (more than four times a  
24  
25 week).  
26  
27  
28  
29 7) Paresis: any distribution including unilateral or bilateral limb or face,  
30  
31  
32 8) Consciousness levels onset based on the Japan Coma Scale (JCS) [9] [10], the most  
33  
34 widely used Japanese scale composed of the four levels,  
35  
36  
37  
38 1; JSC 0 (alert),  
39  
40  
41 2; JCS 1-digit code (disoriented but awake),  
42  
43  
44 3; JCS 2-digit code (arousable with stimulation),  
45  
46  
47 4; JSC 3-digit code (unarousable)  
48  
49  
50  
51

52 ***Statistical Analysis***  
53  
54  
55  
56  
57  
58  
59  
60

1  
2  
3  
4  
5  
6 Statistical analyses used include Fisher exact tests for frequencies of listed  
7  
8 characteristics among the three stroke types, Student-t test for such numerical variables  
9  
10 as age and systolic- and diastolic-blood pressures, a log-rank test for Kaplan-Meier  
11  
12 curves of estimated survival. The Mantel-Haenszel method and a logistic regression  
13  
14 model were used to estimate univariate and multivariate odds ratios. Cox proportional  
15  
16 hazards regression was used to calculate age-, sex-, systolic and diastolic blood  
17  
18 pressure-, and consciousness levels-adjusted hazard ratios and their 95% confidence  
19  
20 intervals for the risk of death. Analyses were performed using SPSS ver.19 and  
21  
22 statistical significance was set at  $p < 0.05$ . All reported p values are 2-sided.  
23  
24  
25  
26  
27  
28  
29  
30  
31  
32  
33  
34

### 35 ***Ethics Statement***

36  
37  
38 This research was performed in accordance with the ethical principles for medical  
39  
40 research involving human subjects outlined in the Declaration of Helsinki. This research  
41  
42 was approved by the Board of Directors, the Kyoto Medical Association, the  
43  
44 Department of Health and Welfare, Kyoto Prefecture and Ethics Committee of the  
45  
46 National Hospital Organization, Minami Kyoto Hospital. Since all identifying personal  
47  
48 information was stripped from the secondary files before analysis, the boards waived  
49  
50 the requirement for written informed consent from the patients involved.  
51  
52  
53  
54  
55  
56  
57  
58  
59  
60

## Results

We reviewed 14,268 stroke patients newly identified in Kyoto prefecture from January 1999 to December 2009. Of these 12,774 (89.5%), 9,232 (64.7%), 2,504 (17.5%), and 342 (2.4%) underwent CT, MRI scan, angiography, and scintigraphy for blood flow. Excluding 480 (3.3%) unclassified patients, 13,788 (96.6%) patients formed the basis of further analyses dividing them into three subtypes of stroke, CI, CH, and SAH categories.

The study cohort had 13,788 patients divided into 9,011 (65.4%) CI, 3,549 (25.7%) CH and 1,197 (8.7%) SAH cases. A small number of patients had a combination of stroke types as follows: 12 with CI and CH, 4 with CI and SAH, and 15 with CH and SAH. Table 1 summarizes the characteristics, risk factors, symptoms, and mortality rate.

Table 1 Characteristics of Stroke Patients (n=13,788)

| Overall | Cerebral<br>infarction | Cerebral<br>hemorrhage | Subarachnoid<br>hemorrhage |
|---------|------------------------|------------------------|----------------------------|
|         | n=9,011                | n=3,549                | n=1,197                    |



|                                                          |                    | (65.4%)                        | (25.7%)                         | (8.7%)                      |
|----------------------------------------------------------|--------------------|--------------------------------|---------------------------------|-----------------------------|
| <b>Age (mean± SD)</b>                                    | 71.3 (12.9)        | 73.3<br>(11.8) <sup>*1*3</sup> | 69.1 (13.6)<br><sup>*1*2</sup>  | 62.7 (13.5) <sup>*2*3</sup> |
| <b>Sex, % female</b>                                     | 45.2 (6,233:7,555) | 42.3 <sup>*1*3</sup>           | 45.9 <sup>*1*2</sup>            | 64.6 <sup>*2*3</sup>        |
| <b>(n=female:<br/>male)</b>                              |                    | (3,815:5,196)                  | (1,630:1,919)                   | (773:424)                   |
| <b>Systolic blood<br/>pressure (mean±<br/>SD), mmHg</b>  | 161.3 (35.5)       | 157.5<br>(28.3) <sup>*1</sup>  | 172.1 (34.8)<br><sup>*1*2</sup> | 157.9 (37.0) <sup>*2</sup>  |
| <b>Diastolic blood<br/>pressure (mean±<br/>SD), mmHg</b> | 87.6 (18.63)       | 85.6 (17.0)<br><sup>*1*3</sup> | 93.1 (21.1)<br><sup>*1*2</sup>  | 86.8 (21.8) <sup>*2*3</sup> |
| <b>Hypertension<br/>history, %</b>                       | 62.6 (8,005:4,780) | 62.0 <sup>*1*3</sup>           | 68.5 <sup>*1*2</sup>            | 49.9 <sup>*2*3</sup>        |
| <b>(n=with:<br/>without)</b>                             |                    | (5,285:3,242)                  | (2,183:1,006)                   | (520:522)                   |
| <b>Arrhythmia, %</b>                                     | 14.5               | 18.9 <sup>*1*3</sup>           | 5.9 <sup>*1*2</sup>             | 7.2 <sup>*2*3</sup>         |
| <b>(n=with:</b>                                          | (1,932:11,352)     | (1,647:7,064)                  | (200:3,209)                     | (82:1,052)                  |

|                       |                    |                            |                            |                            |
|-----------------------|--------------------|----------------------------|----------------------------|----------------------------|
| <b>without)</b>       |                    |                            |                            |                            |
| <b>Arrhythmia</b>     | 18.5(2,357:10,415) | 24.3 <sup>*1*3</sup>       | 7.5 <sup>*1*2</sup>        | 5.3 <sup>*2*3</sup>        |
| <b>history, %</b>     |                    | (2,060:6,432)              | (240:2,971)                | (55:985)                   |
| <b>(n=with:</b>       |                    |                            |                            |                            |
| <b>without)</b>       |                    |                            |                            |                            |
| <b>Diabetes</b>       | 20.9               | 24.8 <sup>*1*3</sup>       | 14.8 <sup>*1*2</sup>       | 6.9 <sup>*2*3</sup>        |
| <b>mellitus</b>       | (2,689:10,198)     | (2,138:6,475)              | (474:2,738)                | (71:963)                   |
| <b>history, %</b>     |                    |                            |                            |                            |
| <b>(n=with:</b>       |                    |                            |                            |                            |
| <b>without)</b>       |                    |                            |                            |                            |
| <b>Hyperlipemia</b>   | 19.2               | 23.1 <sup>*1*3</sup>       | 11.9 <sup>*1*2</sup>       | 9.2 <sup>*2*3</sup>        |
| <b>history, %</b>     | (2,419:10,198)     | (1,951:6,503)              | (371:2,755)                | (93:918)                   |
| <b>(n=with:</b>       |                    |                            |                            |                            |
| <b>without)</b>       |                    |                            |                            |                            |
| <b>Tobacco use, %</b> | 32.4 (3,665:7,642) | 32.6 <sup>*1*3</sup>       | 30.1 <sup>*1*2</sup>       | 37.1 <sup>*2*3</sup>       |
| <b>(n=with:</b>       |                    | (2,455:5,077)              | (843:1,956)                | (354:599)                  |
| <b>without)</b>       |                    |                            |                            |                            |
| <b>Non smoker, %</b>  | 67.6 (7,642)       | 67.4 (5,077) <sup>*3</sup> | 69.9 (1,956) <sup>*2</sup> | 62.9 (599) <sup>*2*3</sup> |

|                 |                    |                              |                            |                            |
|-----------------|--------------------|------------------------------|----------------------------|----------------------------|
| (n)             |                    |                              |                            |                            |
| Former          | 5.4 (615)          | 5.8 (435) <sup>*3</sup>      | 5.7 (159) <sup>*2</sup>    | 2.1 (20) <sup>*2*3</sup>   |
| smoker, % (n)   |                    |                              |                            |                            |
| Light smoker, % | 17.0 (1,918)       | 17.0 (1,281) <sup>*1*3</sup> | 14.6 (409) <sup>*1*2</sup> | 23.3 (222) <sup>*2*3</sup> |
| (n)             |                    |                              |                            |                            |
| Heavy smoker, % | 10.0 (1,132)       | 9.8 (739)                    | 9.8 (275)                  | 11.8 (112)                 |
| (n)             |                    |                              |                            |                            |
| Alcohol use, %  | 38.0 (4,202/6,851) | 36.3 <sup>*1*3</sup>         | 40.5 <sup>*1*2</sup>       | 43.6 <sup>*2*3</sup>       |
| (n=with:        |                    | (2,654:4,655)                | (1,124:1,650)              | (412:533)                  |
| without)        |                    |                              |                            |                            |
| Non drinker, %  | 62.0 (6,851)       | 63.7 (4,655) <sup>*1*3</sup> | 59.5 (1,650) <sup>*1</sup> | 56.4 (533) <sup>*3</sup>   |
| (n)             |                    |                              |                            |                            |
| Occasional      | 15.3 (1,692)       | 15.5 (1,131) <sup>*1*3</sup> | 13.5 (374) <sup>*1*2</sup> | 18.9 (179) <sup>*2*3</sup> |
| drinker, % (n)  |                    |                              |                            |                            |
| Every day       | 22.7 (2,510)       | 20.8 (1,523) <sup>*1*3</sup> | 27.0 (750) <sup>*1</sup>   | 24.7 (233) <sup>*3</sup>   |
| drinker, % (n)  |                    |                              |                            |                            |
| Paresis, %      | 73.3 (9,670:3,525) | 76.8 <sup>*1*3</sup>         | 78.5 <sup>*1*2</sup>       | 26.8 <sup>*2*3</sup>       |
| (n=with:        |                    | (6,750:2,041)                | (2,624:717)                | (277:756)                  |

|                        |                     |                              |                              |                            |
|------------------------|---------------------|------------------------------|------------------------------|----------------------------|
| <b>without)</b>        |                     |                              |                              |                            |
| <b>Consciousness</b>   | 43.5 (5,914: 7,676) | 31.8 <sup>*1*3</sup>         | 65.7 <sup>*1</sup> (2,305:   | 65.1 <sup>*3</sup> (775:   |
| <b>disturbance, %</b>  |                     | (2,815:                      | 1,201)                       | 415)                       |
| <b>(n=with:</b>        |                     | 8,863)                       |                              |                            |
| <b>without)</b>        |                     |                              |                              |                            |
| <b>JCS 0, % (n)</b>    | 55.7 (7,676)        | 67.1 <sup>*1*3</sup> (6,048) | 33.8 <sup>*1*2</sup> (1,201) | 35.6 <sup>*2*3</sup> (415) |
| <b>JSC 1-digit</b>     | 19.0 (2,619)        | 16.7 <sup>*1</sup> (1,508)   | 26.0 <sup>*1*2</sup> (921)   | 15.9 <sup>*2</sup> (185)   |
| <b>code, % (n)</b>     |                     |                              |                              |                            |
| <b>JSC 2-digit</b>     | 11.6 (1,602)        | 8.6 <sup>*1*3</sup> (774)    | 17.5 <sup>*1</sup> (622)     | 16.7 <sup>*3</sup> (200)   |
| <b>code, % (n)</b>     |                     |                              |                              |                            |
| <b>JSC 3-digit</b>     | 10.9 (1,509)        | 4.7 <sup>*1*3</sup> (421)    | 20.2 <sup>*1*2</sup> (716)   | 30.5 <sup>*2*3</sup> (365) |
| <b>code, % (n)</b>     |                     |                              |                              |                            |
| <b>JSC</b>             | 1.3 (184)           | 1.2 <sup>*3</sup> (112)      | 1.3 <sup>*2</sup> (46)       | 2.1 <sup>*2*3</sup> (25)   |
| <b>undetermined, %</b> |                     |                              |                              |                            |
| <b>(n)</b>             |                     |                              |                              |                            |
| <b>Delay time</b>      | 3.91±4.82           | 4.20±5.21                    | 3.50±4.13                    | 3.13±3.77                  |
| <b>(mean± SD)</b>      |                     |                              |                              |                            |
| <b>CT, % (n)</b>       | 89.7 (12,365)       | 85.1 (7,668)                 | 98.2 (3,485) <sup>*1</sup>   | 98.8 (1,183) <sup>*3</sup> |

|                          |                     |              |              |                 |
|--------------------------|---------------------|--------------|--------------|-----------------|
|                          |                     |              | *1*3         |                 |
| <b>MRI, % (n)</b>        | 64.5 (8,891)        | 79.8 (7,148) | 40.3 (1,429) | 25.1 (300) *1*3 |
|                          |                     | *1*3         | *1*2         |                 |
| <b>Surgery %</b>         | 16.0 (2,171:11,399) | 4.2          | 26.1         | 74.6 (871:297)  |
| <b>(n=with: without)</b> |                     | (374:8,495)  | (915:2,588)  | *1*3            |
|                          |                     | *1*3         | *1*2         |                 |
| <b>Mortality, %</b>      | 9.8 (1,344:12,391)  | 5.2 *1*3     | 15.2 *1*2    | 28.4 *2*3       |
| <b>(n=dead: alive)</b>   |                     | (467:8,981)  | (536:2,997)  | (338:853)       |

When the numbers entered in the table above are significantly different between different types of strokes, they are marked as follows:

\*1: significant difference between cerebral infarction and cerebral hemorrhage;

\*2: sig. difference between cerebral hemorrhage and subarachnoid hemorrhage;

\*3: sig. difference between subarachnoid hemorrhage and cerebral infarction;

SD = Standard Deviation

Temporal trends of characteristics of stroke patients, comparing Group-A and Group-B, are summarized in Table 2 and hazard ratios for death, comparing the two groups are

summarized in Table 3. Characteristics of stroke patients in Group-A and Group-B are summarized in supplementary Table 3.

Table 2 Temporal trends of characteristics of stroke patients, comparing Group-A and Group-B

|                                                  | Group-A       | Group-B       | P      | Difference/OR                            |
|--------------------------------------------------|---------------|---------------|--------|------------------------------------------|
| <b>Age (mean± SD)</b>                            | 70.5±12.7     | 72.3±13.0     | <0.001 | -1.85<br>(-2.28~-1.41)<br>* <sup>1</sup> |
| <b>Sex, % female</b>                             | 44.8          | 45.7          | 0.505  | 1.02                                     |
| <b>(n=female: male)</b>                          | (3,531:4,349) | (2,702:3,206) |        | (0.96~1.09)* <sup>2</sup>                |
| <b>Systolic blood pressure (mean± SD), mmHg</b>  | 161.5±31.6    | 161±31.5      | 0.449  | 0.41<br>(-0.66~1.49)* <sup>1</sup>       |
| <b>Diastolic blood pressure (mean± SD), mmHg</b> | 87.3±18.7     | 88.0±19.0     | 0.036  | -0.69<br>(-1.33~-0.05)* <sup>1</sup>     |

|                      |               |               |        |                            |
|----------------------|---------------|---------------|--------|----------------------------|
| <b>Hypertension</b>  | 60.2          | 65.9          | <0.001 | 1.19~1.38* <sup>2</sup>    |
| <b>history, %</b>    | (4,379:2,900) | (3,626:1,880) |        |                            |
| <b>(n=with:</b>      |               |               |        |                            |
| <b>without)</b>      |               |               |        |                            |
| <b>Arrhythmia, %</b> | 14.9          | 14.0          | 0.079  | 0.92                       |
| <b>(n=with:</b>      | (1,132:6,446) | (800:4,906)   |        | (0.83~1.01) * <sup>2</sup> |
| <b>without)</b>      |               |               |        |                            |
| <b>Arrhythmia</b>    | 19.0 (74.7)   | 17.7          | 0.059  | 0.92                       |
| <b>history, %</b>    |               | (974:4,531)   |        | (0.84~1.00) * <sup>2</sup> |
| <b>(n=with:</b>      |               |               |        |                            |
| <b>without)</b>      |               |               |        |                            |
| <b>Diabetes</b>      | 20.5          | 21.4          | 0.327  | 1.04                       |
| <b>mellitus</b>      | (1,500:5,827) | (1,189:4,371) |        | (0.96~1.14) * <sup>2</sup> |
| <b>history, %</b>    |               |               |        |                            |
| <b>(n=with:</b>      |               |               |        |                            |
| <b>without)</b>      |               |               |        |                            |
| <b>Hyperlipemia</b>  | 17.5          | 21.4          | <0.001 | 1.27                       |
| <b>history, %</b>    | (1,250:5,910) | (1,169:4,288) |        | (1.16~1.39) * <sup>2</sup> |

|                       |               |               |        |                             |
|-----------------------|---------------|---------------|--------|-----------------------------|
| <b>(n=with:</b>       |               |               |        |                             |
| <b>without)</b>       |               |               |        |                             |
| <b>Tobacco use, %</b> | 33.6          | 30.9          | 0.001  | 0.88                        |
| <b>(n=with:</b>       | (2,152:4,259) | (1,513:3,383) |        | (0.81~0.95) * <sup>2</sup>  |
| <b>without)</b>       |               |               |        |                             |
| <b>Alcohol use, %</b> | 39.5          | 36.1 (1,724)  | 0.002  | 0.89                        |
| <b>(n=with:</b>       | (2,478:3,797) |               |        | (0.82~0.96) * <sup>2</sup>  |
| <b>without)</b>       |               |               |        |                             |
| <b>Paresis, %</b>     | 73.7          | 72.7          | 0.116  | 0.94                        |
| <b>(n=with:</b>       | (5,581:1,987) | (4,087:1,534) |        | (0.87~1.02)* <sup>2</sup>   |
| <b>without)</b>       |               |               |        |                             |
| <b>Consciousness</b>  | 42.4          | 45.0          | 0.055  | 1.07                        |
| <b>disturbance, %</b> | (3,290:4,463) | (2,624:3,207) |        | (1.00~1.14) * <sup>2</sup>  |
| <b>(n=with:</b>       |               |               |        |                             |
| <b>without)</b>       |               |               |        |                             |
| <b>Delay time</b>     | 4.15±5.03     | 3.60±4.54     | <0.001 | -0.55                       |
| <b>(mean± SD)</b>     |               |               |        | (-0.73~-0.38)* <sup>1</sup> |
| <b>CT, % (n)</b>      | 92.4 (7,285)  | 86.1 (5,080)  | <0.001 | 0.51                        |



|                        |                 |              |        |                            |
|------------------------|-----------------|--------------|--------|----------------------------|
|                        |                 |              |        | (0.45~0.57) * <sup>2</sup> |
| <b>MRI, % (n)</b>      | 59.4 (4,682)    | 71.3 (4,209) | <0.001 | 1.68                       |
|                        |                 |              |        | (1.56~1.80) * <sup>2</sup> |
| <b>Surgery %</b>       | 17.6            | 13.9         | <0.001 | 0.76                       |
| <b>(n=with:</b>        | (1,356:6,339)   | (815:5,060)  |        | (0.69~0.83) * <sup>2</sup> |
| <b>without)</b>        |                 |              |        |                            |
| <b>Mortality, %</b>    | 9.5 (745:7,097) | 10.2         | 0.771  | 1.02                       |
| <b>(n=dead: alive)</b> |                 | (599:5,294)  |        | (0.91~1.14) * <sup>2</sup> |

\*<sup>1</sup>Mean difference (95% confidence interval of the difference)

\*<sup>2</sup>Mantel-Haenszel common odds ratio (95% confidence interval)

OR= Odds Ratio

Table 3 Hazard Ratios for death, comparing Group-A and Group-B

|  | Hazard Ratio<br>(Group-B/Group-A) | 95% Confidence Interval |       | p |
|--|-----------------------------------|-------------------------|-------|---|
|  |                                   | Lower                   | Upper |   |
|  |                                   | Over all                | 1.33  |   |

|                         |      |      |      |       |
|-------------------------|------|------|------|-------|
| Cerebral infarction     | 1.33 | 1.04 | 1.70 | 0.021 |
| Cerebral hemorrhage     | 1.06 | 0.83 | 1.34 | 0.650 |
| Subarachnoid hemorrhage | 1.25 | 0.92 | 1.70 | 0.147 |

Adjusted for age, sex, histories of hypertension, arrhythmia, diabetes mellitus and hyperlipemia, and uses of tobacco and alcohol

Odds ratios for the prevalence of risk factors among stroke subtypes, adjusted for age and sex, were calculated using a logistic regression model and are summarized in Table 3.

Table 4 Odds Ratios for the prevalence of risk factors among stroke subtypes, adjusted for age and sex

|                                 | Odds Ratio | 95% Confidence Interval |       | p      |
|---------------------------------|------------|-------------------------|-------|--------|
|                                 |            | Lower                   | Upper |        |
| <b>History of hypertension</b>  |            |                         |       |        |
| <b>Cerebral infarction (CI)</b> | Reference  |                         |       |        |
| <b>Cerebral hemorrhage (CH)</b> | 1.36       | 1.25                    | 1.49  | <0.001 |
| <b>Subarachnoid hemorrhage</b>  | 0.65       | 0.57                    | 0.74  | <0.001 |

|                                     |           |      |      |        |
|-------------------------------------|-----------|------|------|--------|
| (SAH)                               |           |      |      |        |
| <b>History of arrhythmia</b>        |           |      |      |        |
| CI                                  | Reference |      |      |        |
| CH                                  | 0.28      | 0.24 | 0.33 | <0.001 |
| SAH                                 | 0.26      | 0.19 | 0.34 | <0.001 |
| <b>History of diabetes mellitus</b> |           |      |      |        |
| CI                                  | Reference |      |      |        |
| CH                                  | 0.49      | 0.44 | 0.55 | <0.001 |
| SAH                                 | 0.20      | 0.16 | 0.26 | <0.001 |
| <b>History of hyperlipemia</b>      |           |      |      |        |
| CI                                  | Reference |      |      |        |
| CH                                  | 0.40      | 0.35 | 0.45 | <0.001 |
| SAH                                 | 0.24      | 0.19 | 0.30 | <0.001 |

Table 1 also shows historical account on hypertension in 12,785 (92.7%), arrhythmia in 12,772 (92.6%), diabetes mellitus in 12,887 (93.5%), hyperlipemia in 12,617 (91.5%), tobacco usage in 11,307 (82.0%), alcohol usage in 11,053 (80.2%), and paresis in

1  
2  
3  
4  
5  
6 13,195 (96.7%). We were able to classify 13,406 (97.2%) patients into four  
7  
8  
9 consciousness levels, excluding 184 (1.3%) patients with uncategorized stroke and 580  
10  
11 (4.2%) patients with no reliable information on conscious levels. Calculation of the  
12  
13  
14 mean delay time excluded 4964 (36.0%) patients of unknown onset. Patients received  
15  
16  
17 primary medical care within 3 hours of CI in 54.3%, of CH in 68.5% in CH, and of  
18  
19  
20 SAH in 76.4%.  
21

22  
23 Of 13,788 patients, 13,735 (99.6%) had a confirmed record of survival or death  
24  
25  
26 30 days after stroke onset. A total of 1,344 (9.8%) patients died within this time period.  
27  
28

29 Figure 1 shows Kaplan-Meier Survival curves, comparing stroke subtypes,  
30  
31 showing a significant difference ( $p < 0.001$ ) between any two subtypes based on  
32  
33  
34 Log-rank tests.  
35  
36

37 Compared to CI, CH and SAH hazard ratios for fatality of 3.66 (3.07-4.37),  
38  
39 and 8.91 (7.18-11.06)  $p < 0.001$ , when adjusted for age, sex, histories of hypertension,  
40  
41  
42 arrhythmia, diabetes mellitus and hyperlipemia and uses of tobacco and alcohol,  
43  
44  
45 showing significant differences ( $p < 0.001$ ) (Table 5).  
46  
47  
48  
49  
50  
51

52 Table 5 Hazard ratios for death, comparing stroke subtypes  
53

|  | HR | 95% Confidence Interval | p |
|--|----|-------------------------|---|
|  |    |                         |   |

|                                |           | Lower | Upper |        |
|--------------------------------|-----------|-------|-------|--------|
| <b>Cerebral infarction</b>     | Reference |       |       |        |
| <b>Cerebral hemorrhage</b>     | 3.66      | 3.07  | 4.37  | <0.001 |
| <b>Subarachnoid hemorrhage</b> | 8.91      | 7.18  | 11.06 | <0.001 |

Adjusted for age, sex, histories of hypertension, arrhythmia, diabetes mellitus and hyperlipemia, and uses of tobacco and alcohol

Hazard ratios for death, comparing stroke subtypes, in Group-A and Group-B are summarized in Supplementary Table 4 A and B.

## Discussion

The study summarized the stroke registry covering entire prefecture for 11 years. Such data set depends on the society and the times. Hospitals affiliated to the Kyoto Medical Association registered new stroke patients based on the inclusion and

1  
2  
3  
4  
5  
6 exclusion criteria in accordance with the Kyoto municipal ordinance, avoiding area or  
7  
8 hospitals preferences.  
9

10  
11  
12  
13  
14 One of the major purposes of these prefectural stroke registries is to clarify the current  
15  
16 situation of stroke events in order to maintain and improve health care system in the  
17  
18 prefecture. In Japan, health care systems largely depend on each prefectural government,  
19  
20 and therefore information on each prefecture is important. Japan has 47 prefectures. To  
21  
22 our knowledge, there are five stroke registries based on a population in the entire  
23  
24 prefecture in recent years; Akita Stroke Registry (ASR) [11-14], Iwate Stroke Registry  
25  
26 (ISR) [15], Tochigi Stroke Registry (TSR) [16 17], Miyazaki Stroke Registry  
27  
28 (MSR) [18] and KSR. Although each prefectural registry reported the result annually to  
29  
30 the local government, to health care centers, and to the public, most of them are not  
31  
32 available in English literature. We summarized incidence information based on KSR in  
33  
34 supplementary Tables 2 A, B and C. ASR has been published age-adjusted gender  
35  
36 specific incidence. Although we could not find age-adjusted gender specific incidence  
37  
38 among the other prefectural stroke registries, TSR and MSR reported data on numbers  
39  
40 of patients they registered. We calculated age-adjusted gender specific incidence in TSR  
41  
42 and MSR based on their annual report and summarized them in supplementary Tables 2  
43  
44  
45  
46  
47  
48  
49  
50  
51  
52  
53  
54  
55  
56  
57  
58  
59  
60

1  
2  
3  
4  
5  
6 D, E, F, G, H and I. ISR says that their reports will be ready [19]. All the prefectural  
7  
8 registries ask as many hospitals and facilities to register all the stroke events as possible.  
9  
10  
11 Registration, however, is not mandatory but depends on voluntary contributions of  
12  
13 hospitals. Some hospitals might be difficult to undertake this social work. Therefore,  
14  
15 registries on more restricted area should be more suitable to clarify stroke incidence in a  
16  
17 community. The incidence rates of stroke reported from the Takashima Stroke Registry  
18  
19 [20-22] and the Hisayama Study [23-25] are higher than those from the prefectural  
20  
21 stroke registries. The Hisayama study is reported to examine about 80 % residents (at  
22  
23 age of 40 or over) of the area, which has a population of about 8,400 [26].  
24  
25  
26 Age-standardized incidence rates (per 10,000 person-years) of stroke in the 3<sup>rd</sup> cohort  
27  
28 (1988-2000) of the Hisayama Study are 529 in men and 388 in women [23]. Among  
29  
30 subtypes of stroke, they are 357:77, 130:21 and 42:13 (men: women) in cerebral  
31  
32 infarction, cerebral hemorrhage and subarachnoid hemorrhage, respectively [23].  
33  
34  
35  
36  
37  
38  
39  
40  
41  
42  
43  
44  
45  
46 The average annual mortality of cerebral hemorrhage is 3.9 per 1,000 PYE whereas that  
47  
48 of cerebral infarction is 6.5 in Hisayama population aged 40 and over [11]. Some  
49  
50 prefectural stroke registries reported mortality rates. In TSR, they were 10%, 16% and  
51  
52 29% in CI, CH and SAH, respectively [16]. According to ASR, survival rates were 94%,  
53  
54  
55  
56  
57  
58  
59  
60

1  
2  
3  
4  
5  
6 92%, 83%, 84%, 70% and 70% in CI-men, CI-women, CH-men, CH-women, SAH-men  
7  
8  
9 and SAH-women, respectively [13 14], which generally agrees with the results of KSR.

10  
11 The present study added the age, sex, histories of hypertension, arrhythmia, diabetes  
12  
13 and hyperlipemia, and uses of tobacco and alcohol adjusted hazard ratios for death in  
14  
15 each stroke subtype.  
16  
17  
18  
19

20  
21  
22  
23 In KSR, voluntary contribution mentioned above has built up a registry of 14,268 stroke  
24  
25 patients over 11 years. To be compared with the other prefectural registries, one of the  
26  
27 outstanding strengths of KSR is that it has information on survival days up to 30 days  
28  
29 after the onset in 13,735 patients out of 13,788 patients of this study cohort (99.6%).  
30  
31

32  
33 KSR makes it possible to analyse relationships between a certain factor and early  
34  
35 mortality. Strengths of stroke registry in Japan include a high availability of CT and  
36  
37 MRI. Japan has the most MRI units (40 U per million population) and CT scanners (93  
38  
39 U per million populations) among the developed countries [27]. In the study cohort,  
40  
41 12,365 patients (89.7%) had CT examination and 8,891 patients (64.5%) had MRI  
42  
43 examination. The study added the information on recent trends on usage of these  
44  
45 examinations. As expected, but interestingly, the usage CT declined whereas the usage  
46  
47 of MRI increased with time during the study period of 11 years.  
48  
49  
50  
51  
52  
53  
54  
55  
56  
57  
58  
59  
60



1  
2  
3  
4  
5  
6  
7  
8  
9 In agree with previous reports, CI showed higher incidence followed by CH  
10 and SAH, which constitutes a fourth of hemorrhagic strokes [24]. The result adds the  
11 information that SAH constitutes about a fourth of hemorrhagic strokes. Age  
12 distribution also confirm the result of previous reports, the oldest mean age in CH and  
13 youngest in SAH [28]. The elderly patients showed a greater difference in proportion in  
14 stroke subtypes. For example, in patients who were 71 years or older, the proportions  
15 were 73.1% (n=5616), 22.3% (n=1709), and 4.6% (n=353), as compared to younger  
16 group who showed 55.8% (n=3,395), 30.3% (n=1,840) and 13.9% (n=844).  
17  
18  
19  
20  
21  
22  
23  
24  
25  
26  
27  
28  
29  
30  
31

32 Most of the other characteristics also showed significant difference among  
33 three stroke subtypes. The overall registry had more male patients than female, except  
34 almost two-thirds of SAH cases were female. The initial medical examination revealed  
35 higher systolic and diastolic blood pressures in CH than in CI, possibly reflecting  
36 intracranial mass effect on brain edema [29 30].  
37  
38  
39  
40  
41  
42  
43  
44  
45

46 Patients with disturbed consciousness had a higher ( $p<0.001$ ) systolic/diastolic  
47 blood pressure (mean  $\pm$  SD:  $164.0 \pm 35.2/88.6 \pm 20.9$ ) than the remainder ( $159.3 \pm$   
48  $28.2/87.0 \pm 17.1$ ), implying possible association between stroke severity and degree of  
49 hypertension.  
50  
51  
52  
53  
54  
55  
56  
57  
58  
59  
60

1  
2  
3  
4  
5  
6 Risk factors for stroke include hypertension [31], arrhythmia [32], diabetes  
7  
8  
9 mellitus [33 34], hyperlipemia [35], alcohol use [36 37], and tobacco use . Except for  
10  
11  
12 tobacco and alcohol uses, these factors were noted most often in CI, followed by CH,  
13  
14  
15 and least in SAH. Hypertension, probably plays the most important role, was found in  
16  
17  
18 more than 60 % of all stroke patients. A history of arrhythmia and diabetes mellitus,  
19  
20  
21 relatively high in CI and lower in CH, was rarely found in SAH. These data suggest a  
22  
23  
24 limited association between these three factors and hemorrhagic strokes. The Ministry  
25  
26  
27 of Health, Labour and Welfare of Japan, has estimated morbidity rates of hypertension,  
28  
29  
30 diabetes mellitus and hyperlipemia among Japanese aged from 40 to 74 as 49.9%,  
31  
32  
33 11.4% and 17.7%, respectively. In our series, a history of hypertension exceeded this  
34  
35  
36 estimate in CI and CH. A history of diabetes mellitus was higher in CI and CH, but  
37  
38  
39 lower in SAH, suggesting that this may not be a risk factor in SAH. A history of  
40  
41  
42 hyperlipemia was also lower in SAH than the morbidity rate, also suggesting that this  
43  
44  
45 may not a risk factor in SAH. Regarding the risk factor of stroke, the data may not add  
46  
47  
48 sufficient information on the effect of risk factors on stroke occurrence. The registry  
49  
50  
51 data are not meant to do that type of study. The registry data, however, are appropriate  
52  
53  
54 to present the prevalence of different risk factors among the stroke patients. The higher  
55  
56  
57 prevalence of a factor in a certain group may support the higher association between the  
58  
59  
60

1  
2  
3  
4  
5  
6 factor and the group. This study added information on the prevalence of risk factors  
7  
8  
9 among stroke patients and clarified the differences among stroke subtypes. We also  
10  
11  
12 added multivariate analyses. Using a logistic regression model, we estimated odds ratios  
13  
14  
15 and 95% confidence intervals for the prevalence of these risk factors comparing each  
16  
17  
18 stroke subtype after adjusted for age and sex.

19  
20  
21 Alcohol and tobacco use showed a higher correlation to SAH than the other  
22  
23  
24 types in the surveillance conducted under the same conditions for the three subtypes of  
25  
26  
27 stroke. Alcohol and tobacco usage may therefore increase the risk of SAH more than CI  
28  
29  
30 or CH. The proportion of heavy smokers was not different among stroke subtypes,  
31  
32  
33 whereas the proportion of every day drinkers was higher in hemorrhagic strokes than in  
34  
35  
36 ischemic stroke. Paresis developed more often in CI and CH compared to SAH.  
37  
38  
39 Hemorrhagic stroke caused consciousness disturbance more than ischemic stroke.

40  
41  
42  
43  
44 The characteristics significantly different between Group-A and Group-B were  
45  
46  
47 age, diastolic blood pressure, histories of hypertension and hyperlipemia, tobacco and  
48  
49  
50 alcohol use, delay time and surgery. Hazard ratio for death in cerebral infarction was  
51  
52  
53 significantly higher in Group-B than that in Group-A after adjusted for age, sex,  
54  
55  
56 histories of risk factors and uses of tobacco and alcohol.

1  
2  
3  
4  
5  
6  
7  
8  
9 We calculated mortality based on the information up to 30 days after the stroke  
10  
11  
12 onset, excluding those who died later. Early mortality indicates stroke events themselves,  
13  
14  
15 whereas long term mortality reflects aftereffects and complications. Thus, early  
16  
17  
18 mortality serves well to evaluate the severity of the three major stroke subtypes. Death  
19  
20  
21 in the first month after stroke mainly results from neurological causes such as brain  
22  
23  
24 edema[38], followed by complications of immobility including pneumonia [39].  
25  
26  
27 The mortality rate of ischemic stroke and risk characteristics must vary by its subtypes,  
28  
29  
30 such as embolic stroke and lacunar stroke. However, sufficient information to classify  
31  
32  
33 ischemic stroke into more detailed categories was not available in this study.  
34  
35  
36  
37

### 38 ***Limitations***

39  
40  
41  
42  
43  
44 Firstly, there may be missing data for stroke patients; for example, patients who died  
45  
46  
47 before arriving to hospitals and patients who went to hospital outside of the prefecture.  
48  
49  
50 Patients with mild symptoms might not have visited hospitals and patients with atypical  
51  
52  
53 symptoms might not have been diagnosed as such, and subsequently might not have  
54  
55  
56 been registered [5].  
57  
58  
59  
60

1  
2  
3  
4  
5  
6 Secondary, the study did not encompass the effects of therapeutic interventions, which  
7  
8  
9 must have affected on mortality. It is virtually impossible to adjust all the treatments in a  
10  
11  
12 very large population based study. Treatments should be studied in randomized  
13  
14  
15 controlled studies. The causes of death in the study cohort were not investigated either.  
16  
17  
18 Possible bias exists in the assessment of variables, such as history of habits, which  
19  
20  
21 largely depend on patients' self report or information from their families. The study,  
22  
23  
24 however, showed the overall characteristics and mortality in stroke and in major  
25  
26  
27 subtypes, which should shed light on the difference among the major subtypes as a  
28  
29  
30 whole, since the comparison was done otherwise in the same condition.  
31  
32  
33 Lastly, the outcomes assessment limited to 30 days after onset leaves the majority of  
34  
35  
36 patients (n=11,869, 86.1%) who survived the first month out of consideration. However,  
37  
38  
39 early mortality evaluation within 30-day should reflect cause of death directly  
40  
41  
42 associated with stroke and therefore correlate severity in more direct way.  
43  
44  
45

46  
47 Major conclusions of the study should prevail as a report based on a very large number  
48  
49  
50 of patients analyzed under the same conditions.  
51  
52  
53  
54

### 55 ***Conclusion***

56  
57  
58  
59  
60

1  
2  
3  
4  
5  
6 We have presented population based data for the span of 11 years covering the entire  
7  
8  
9 Kyoto prefecture in Japan. Among stroke major subtypes, hazard ratio for death was  
10  
11  
12 highest in SAH, followed by CH and lowest in CI.  
13

### 14 15 16 17 18 **Acknowledgments**

19  
20 We acknowledge the contribution of participating institutions and their staffs who  
21  
22  
23 provided data in the Kyoto Stroke Registry.  
24  
25  
26  
27

### 28 29 **Figure Legends**

30  
31  
32 Kaplan-Meier survival curves of stroke patients  
33  
34  
35  
36  
37  
38  
39  
40  
41  
42  
43  
44  
45  
46  
47  
48  
49  
50  
51  
52  
53  
54  
55  
56  
57  
58  
59  
60

## References

1. Turin TC, Kokubo Y, Murakami Y, et al. Lifetime risk of acute myocardial infarction in Japan. *Circulation. Cardiovascular quality and outcomes* 2010;**3**(6):701-3 doi: 10.1161/CIRCOUTCOMES.109.930776[published Online First: Epub Date]].
2. Scarborough P, Morgan RD, Webster P, et al. Differences in coronary heart disease, stroke and cancer mortality rates between England, Wales, Scotland and Northern Ireland: the role of diet and nutrition. *BMJ open* 2011;**1**(1):e000263 doi: 10.1136/bmjopen-2011-000263[published Online First: Epub Date]].
3. Lee S, Shafe AC, Cowie MR. UK stroke incidence, mortality and cardiovascular risk management 1999-2008: time-trend analysis from the General Practice Research Database. *BMJ open* 2011;**1**(2):e000269 doi: 10.1136/bmjopen-2011-000269[published Online First: Epub Date]].
4. Anderson GL, Whisnant JP. A comparison of trends in mortality from stroke in the United States and Rochester, Minnesota. *Stroke; a journal of cerebral circulation* 1982;**13**(6):804-9

- 1  
2  
3  
4  
5  
6 5. Shigematsu K, Shimamura O, Nakano H, et al. Vomiting should be a prompt  
7  
8 predictor of stroke outcome. Emergency medicine journal : EMJ 2012 doi:  
9  
10 10.1136/emmermed-2012-201586[published Online First: Epub Date]].  
11  
12  
13  
14 6. Hatano S. Experience from a multicentre stroke register: a preliminary report.  
15  
16 Bulletin of the World Health Organization 1976;**54**(5):541-53  
17  
18  
19  
20 7. International Classification of Diseases, Ninth Revision, Clinical Modification.  
21  
22 Washington, DC: US Department of Health and Human Service. 1988  
23  
24  
25  
26 8. Steindel SJ. International classification of diseases, 10th edition, clinical modification  
27  
28 and procedure coding system: descriptive overview of the next generation  
29  
30  
31  
32 HIPAA code sets. Journal of the American Medical Informatics Association :  
33  
34 JAMIA 2010;**17**(3):274-82 doi: 10.1136/jamia.2009.001230[published Online  
35  
36 First: Epub Date]].  
37  
38  
39  
40 9. Ohta T, Waga S, Handa W, et al. [New grading of level of disordered consciousness  
41  
42 (author's transl)]. No shinkei geka. Neurological surgery 1974;**2**(9):623-7  
43  
44  
45  
46 10. Ohta T, Kikuchi H, Hashi K, et al. Nizofenone administration in the acute stage  
47  
48 following subarachnoid hemorrhage. Results of a multi-center controlled  
49  
50 double-blind clinical study. Journal of neurosurgery 1986;**64**(3):420-6 doi:  
51  
52 10.3171/jns.1986.64.3.0420[published Online First: Epub Date]].  
53  
54  
55  
56  
57  
58  
59  
60



- 1  
2  
3  
4  
5  
6 11. Ueda K, Omae T, Hirota Y, et al. Decreasing trend in incidence and mortality from  
7  
8 stroke in Hisayama residents, Japan. Stroke; a journal of cerebral circulation  
9  
10 1981;**12**(2):154-60  
11  
12  
13  
14 12. Akita Stroke Registry. Secondary Akita Stroke Registry.  
15  
16 <http://www.msuisin.jp/blog/21nousochu.pdf>.  
17  
18  
19  
20 13. Suzuki K. Stroke recurrence. Treatment 2009;**9**:5-10  
21  
22  
23 14. Suzuki K. Epidemiology on recurrent stroke. Prevention of Atherosclerosis  
24  
25 2010;**91**:2560-4  
26  
27  
28 15. Iwate Cancer and Stroke Registry. Secondary Iwate Cancer and Stroke Registry.  
29  
30 [http://www.iwate.med.or.jp/gan\\_nou/index.html](http://www.iwate.med.or.jp/gan_nou/index.html).  
31  
32  
33  
34 16. Tochigi Stroke Registry. Secondary Tochigi Stroke Registry.  
35  
36 <http://www.pref.tochigi.lg.jp/e04/welfare/kenkoudukuri/kenkoudukuri/11732259>  
37  
38 [26699.html](http://www.pref.tochigi.lg.jp/e04/welfare/kenkoudukuri/kenkoudukuri/11732259).  
39  
40  
41  
42  
43 17. Welcome to the official homepage of Tochigi Prefecture, Japan. Secondary Welcome  
44  
45 to the official homepage of Tochigi Prefecture, Japan.  
46  
47 <http://www.pref.tochigi.lg.jp/english/foreignlanguage.html#english>.  
48  
49  
50  
51  
52 18. Miyazaki Stroke Registry. Secondary Miyazaki Stroke Registry 2010.  
53  
54 <http://www.msuisin.jp/blog/21nousochu.pdf>.  
55  
56  
57  
58  
59  
60

- 1  
2  
3  
4  
5  
6 19. Iwate Stroke Registry. Secondary Iwate Stroke Registry.  
7  
8  
9 <http://www.pref.iwate.jp/~hp1353/hoken/toukei/nousottyu/index.html>.  
10  
11  
12 20. Turin TC, Kita Y, Murakami Y, et al. Higher stroke incidence in the spring season  
13  
14 regardless of conventional risk factors: Takashima Stroke Registry, Japan,  
15  
16 1988-2001. Stroke; a journal of cerebral circulation 2008;**39**(3):745-52 doi:  
17  
18 10.1161/STROKEAHA.107.495929[published Online First: Epub Date]].  
19  
20  
21  
22  
23 21. Turin TC, Kita Y, Murakami Y, et al. Increase of stroke incidence after weekend  
24  
25 regardless of traditional risk factors: Takashima Stroke Registry, Japan;  
26  
27 1988-2003. Cerebrovascular diseases 2007;**24**(4):328-37 doi:  
28  
29 10.1159/000106978[published Online First: Epub Date]].  
30  
31  
32  
33  
34  
35 22. Kita Y, Turin TC, Rumana N, et al. Surveillance and measuring trends of stroke in  
36  
37 Japan: the Takashima Stroke Registry (1988 - present). International journal of  
38  
39 stroke : official journal of the International Stroke Society 2007;**2**(2):129-32 doi:  
40  
41 10.1111/j.1747-4949.2007.00107.x[published Online First: Epub Date]].  
42  
43  
44  
45  
46  
47 23. Kubo M, Kiyohara Y, Kato I, et al. Trends in the incidence, mortality, and survival  
48  
49 rate of cardiovascular disease in a Japanese community: the Hisayama study.  
50  
51 Stroke; a journal of cerebral circulation 2003;**34**(10):2349-54 doi:  
52  
53 10.1161/01.STR.0000090348.52943.A2[published Online First: Epub Date]].  
54  
55  
56  
57  
58  
59  
60

- 1  
2  
3  
4  
5  
6 24. Kiyohara Y, Kubo M, Kato I, et al. Ten-year prognosis of stroke and risk factors for  
7  
8 death in a Japanese community: the Hisayama study. Stroke; a journal of  
9  
10 cerebral circulation 2003;**34**(10):2343-7 doi:  
11  
12 10.1161/01.STR.0000091845.14833.43[published Online First: Epub Date]].  
13  
14  
15  
16  
17 25. Hata J, Tanizaki Y, Kiyohara Y, et al. Ten year recurrence after first ever stroke in a  
18  
19 Japanese community: the Hisayama study. Journal of neurology, neurosurgery,  
20  
21 and psychiatry 2005;**76**(3):368-72 doi: 10.1136/jnnp.2004.038166[published  
22  
23 Online First: Epub Date]].  
24  
25  
26  
27  
28 26. Department of Environmental Medicine GSoMS, Kyushu University. About a  
29  
30 Hisayama study. Secondary About a Hisayama study.  
31  
32 <http://www.med.kyushu-u.ac.jp/envmed/about/index.html>.  
33  
34  
35  
36  
37 27. Turin TC, Kita Y, Rumana N, et al. Ischemic stroke subtypes in a Japanese  
38  
39 population: Takashima Stroke Registry, 1988-2004. Stroke; a journal of cerebral  
40  
41 circulation 2010;**41**(9):1871-6 doi:  
42  
43 10.1161/STROKEAHA.110.581033[published Online First: Epub Date]].  
44  
45  
46  
47  
48 28. Tanaka H, Ueda Y, Hayashi M, et al. Risk factors for cerebral hemorrhage and  
49  
50 cerebral infarction in a Japanese rural community. Stroke; a journal of cerebral  
51  
52 circulation 1982;**13**(1):62-73  
53  
54  
55  
56  
57  
58  
59  
60

- 1  
2  
3  
4  
5  
6 29. Hacke W, Schwab S, Horn M, et al. 'Malignant' middle cerebral artery territory  
7  
8 infarction: clinical course and prognostic signs. Archives of neurology  
9  
10 1996;**53**(4):309-15  
11  
12
- 13  
14 30. Klatzo I. Brain oedema following brain ischaemia and the influence of therapy.  
15  
16 British journal of anaesthesia 1985;**57**(1):18-22  
17  
18
- 19  
20 31. Collins R, Peto R, MacMahon S, et al. Blood pressure, stroke, and coronary heart  
21  
22 disease. Part 2, Short-term reductions in blood pressure: overview of randomised  
23  
24 drug trials in their epidemiological context. Lancet 1990;**335**(8693):827-38  
25  
26  
27  
28
- 29 32. Wolf PA, Abbott RD, Kannel WB. Atrial fibrillation as an independent risk factor  
30  
31 for stroke: the Framingham Study. Stroke; a journal of cerebral circulation  
32  
33 1991;**22**(8):983-8  
34  
35  
36  
37
- 38 33. Abbott RD, Donahue RP, MacMahon SW, et al. Diabetes and the risk of stroke. The  
39  
40 Honolulu Heart Program. JAMA : the journal of the American Medical  
41  
42 Association 1987;**257**(7):949-52  
43  
44  
45
- 46 34. Wolf PA, D'Agostino RB, Belanger AJ, et al. Probability of stroke: a risk profile  
47  
48 from the Framingham Study. Stroke; a journal of cerebral circulation  
49  
50 1991;**22**(3):312-8  
51  
52  
53  
54  
55  
56  
57  
58  
59  
60

- 1  
2  
3  
4  
5  
6 35. Iso H, Jacobs DR, Jr., Wentworth D, et al. Serum cholesterol levels and six-year  
7  
8 mortality from stroke in 350,977 men screened for the multiple risk factor  
9  
10 intervention trial. *The New England journal of medicine* 1989;**320**(14):904-10  
11  
12 doi: 10.1056/NEJM198904063201405[published Online First: Epub Date]].  
13  
14  
15  
16  
17 36. Bazzano LA, Gu D, Reynolds K, et al. Alcohol consumption and risk for stroke  
18  
19 among Chinese men. *Annals of neurology* 2007;**62**(6):569-78 doi:  
20  
21 10.1002/ana.21194[published Online First: Epub Date]].  
22  
23  
24  
25  
26 37. Djousse L, Ellison RC, Beiser A, et al. Alcohol consumption and risk of ischemic  
27  
28 stroke: The Framingham Study. *Stroke; a journal of cerebral circulation*  
29  
30 2002;**33**(4):907-12  
31  
32  
33  
34 38. Balami JS, Chen RL, Grunwald IQ, et al. Neurological complications of acute  
35  
36 ischaemic stroke. *Lancet neurology* 2011;**10**(4):357-71 doi:  
37  
38 10.1016/S1474-4422(10)70313-6[published Online First: Epub Date]].  
39  
40  
41  
42  
43 39. Lavados PM, Sacks C, Prina L, et al. Incidence, 30-day case-fatality rate, and  
44  
45 prognosis of stroke in Iquique, Chile: a 2-year community-based prospective  
46  
47 study (PISCIS project). *Lancet* 2005;**365**(9478):2206-15 doi:  
48  
49 10.1016/S0140-6736(05)66779-7[published Online First: Epub Date]].  
50  
51  
52  
53  
54  
55  
56  
57  
58  
59  
60

1  
2  
3  
4  
5  
6  
7  
8  
9  
10  
11  
12  
13  
14  
15  
16  
17  
18  
19  
20  
21  
22  
23  
24  
25  
26  
27  
28  
29  
30  
31  
32  
33  
34  
35  
36  
37  
38  
39  
40  
41  
42  
43  
44  
45  
46  
47  
48  
49  
50  
51  
52  
53  
54  
55  
56  
57  
58  
59  
60

For peer review only

1  
2  
3  
4  
5  
6 Characteristics, risk factors and mortality of stroke patients in Kyoto, Japan  
7  
8  
9

10  
11 **Short title:** Characteristics, risk factors and mortality of Stroke  
12  
13

14  
15  
16  
17 Kazuo Shigematsu<sup>1</sup>, Hiromi Nakano<sup>2</sup>, Yoshiyuki Watanabe<sup>3</sup>, Tatsuyuki Sekimoto<sup>4</sup>,  
18 Kouichiro Shimizu<sup>5</sup>, Akihiko Nishizawa<sup>6</sup>, Masahiro Makino<sup>7</sup>, Atsushi Okumura<sup>8</sup>,  
19 Kazuhiko Bando<sup>9</sup>, Yasushi Kitagawa<sup>10</sup>  
20  
21  
22  
23  
24  
25  
26

27 From: <sup>1</sup>National Hospital Organization, Minami Kyoto Hospital, <sup>2</sup>Kyoto Kidugawa  
28 Hospital, <sup>3</sup>Kyoto Prefectural University of Medicine, <sup>4</sup>Kyoto Yosanoumi Hospital,  
29  
30  
31  
32  
33 <sup>5</sup>Kyoto Fushimi Shimizu Hospital, <sup>6</sup>The Nishizawa Clinic, <sup>7</sup>Japanese Red Cross Kyoto  
34  
35  
36 Daini Hospital, <sup>8</sup>Jujoyo Rehabilitation Hospital, <sup>9</sup>The Bando Clinic, <sup>10</sup>The Kitagawa  
37  
38  
39 Clinic.  
40  
41  
42

43 Correspondence to Kazuo Shigematsu, MD  
44

45  
46 Department of Neurology, the National Hospital Organization, Minami Kyoto Hospital  
47

48  
49 11 Nakaashihara, Jouyou-shi, Kyoto, Japan, 610-0113  
50

51  
52 Phone 81-774-52-0065, Fax 81-774-55-2765, E-mail neuron.k07@gmail.com  
53  
54  
55  
56  
57  
58  
59  
60

1  
2  
3  
4  
5  
6  
7  
8  
9  
10  
11  
12  
13  
14  
15  
16  
17  
18  
19  
20  
21  
22  
23  
24  
25  
26  
27  
28  
29  
30  
31  
32  
33  
34  
35  
36  
37  
38  
39  
40  
41  
42  
43  
44  
45  
46  
47  
48  
49  
50  
51  
52  
53  
54  
55  
56  
57  
58  
59  
60

**Keywords:** epidemiology, public health, stroke medicine

**Contributorship:** All authors equally contributed to this study

**Funding:** none

**Competing interests:** none

For peer review only



## Article Summary

### Article focus

We examined the characteristics, risk factors and outcome of contemporary stroke patients based on the Kyoto Stroke Registry for recent 11 years. The study cohort has 12,774 cerebral infarction (CI), 9,232 cerebral hemorrhage (CH) and 2,540 subarachnoid hemorrhage (SAH) patients.

### Key messages

About two thirds of patients have hypertension history, whereas only about one fifth have histories of arrhythmia, diabetes mellitus and hyperlipemia. The prevalence of risk factors was different among stroke subtypes.

Mortality on 30 days after the onset is 5.2% in CI, 15.2% in CH and 28.4% in SAH.

**Hazard ratios for death adjusted for age, sex, histories of hypertension, arrhythmia, diabetes mellitus and hyperlipemia and uses of tobacco and alcohol, showed a significant ( $P<0.001$ ) difference among CI (a reference), CH (3.66; 3.07-4.37) and SAH (8.91; 27.18-11.06).**

### Strengths and limitations of this study

1  
2  
3  
4  
5  
6  
7  
8  
9  
10  
11  
12  
13  
14  
15  
16  
17  
18  
19  
20  
21  
22  
23  
24  
25  
26  
27  
28  
29  
30  
31  
32  
33  
34  
35  
36  
37  
38  
39  
40  
41  
42  
43  
44  
45  
46  
47  
48  
49  
50  
51  
52  
53  
54  
55  
56  
57  
58  
59  
60

This study provided quantitative data on fundamentals of contemporary stroke in a very large cohort in Kyoto Prefecture, Japan.

Detailed information on size and localization of stroke and on treatment and complication was not available in this population based study.

For peer review only

1  
2  
3  
4  
5  
6 **Objectives:** The aim of the study is to evaluate characteristics, risk factors and outcome  
7  
8  
9 of recent stroke patients in Kyoto Japan.

10  
11  
12 **Design:** We analyzed stroke patients in the registry with regard to their characteristics,  
13  
14 risk factors, and mortality. Cox proportional hazards regression was used to calculate  
15  
16 adjusted hazard ratios for death.  
17  
18  
19

20  
21  
22 **Settings:** The Kyoto prefecture of Japan has established a registry to enroll new stroke  
23  
24 patients in cooperation with the Kyoto Medical Association and its affiliated hospitals  
25  
26  
27  
28

29  
30  
31  
32 **Participants:** The registry now has data on 14,268 patients enrolled from January 1,  
33  
34 1999 to December 31, 2009. Of these 12,774 (89.5%), 9,232 (64.7%), 2,504 (17.5%),  
35  
36 and 342 (2.4%) underwent CT, MRI, angiography, and scintigraphy. Excluding 480  
37  
38 (3.3%) unclassified patients, 13,788 (96.6%) patients formed the basis of further  
39  
40 analyses divided then into three subtypes of stroke, cerebral infarction (CI), cerebral  
41  
42 hemorrhage (CH), and subarachnoid hemorrhage (SAH).  
43  
44  
45  
46  
47  
48  
49

50  
51  
52 **Results:** A total of 13,788 confirmed stroke patients in the study cohort comprised  
53  
54 9,011 (86.3%) CI, 3,549 (25.7%) CH and 1,197 (8.7%) SAH cases. The mean age was  
55  
56  
57  
58  
59  
60

1  
2  
3  
4  
5  
6 73.3 ± 11.8, 69.1 ± 13.6 and 62.7 ± 13.5 in the CI, CH and SAH cases, respectively. In  
7  
8  
9 the CI and CH cases, males were predominant, whereas in the SAH cases, females were  
10  
11 predominant. Frequencies of risk factors were different among the subtypes. Mortality  
12  
13 was worst in the SAH, followed by the CH, and least in the CI. Hazard ratios for death  
14  
15 adjusted for age, sex, histories of hypertension, arrhythmia, diabetes mellitus and  
16  
17 hyperlipemia and uses of tobacco and alcohol, showed a significant (P<0.001)  
18  
19 difference among CI (a reference), CH (3.66; 3.07-4.37) and SAH (8.91; 27.18-11.06).  
20  
21  
22  
23  
24  
25  
26  
27  
28  
29

30 **Conclusions:** Characteristics, risk factors, and mortality were evaluated in a  
31  
32 quantitative manner in a large Japanese study cohort to shed light on the present status  
33  
34 of stroke medicine.  
35  
36  
37  
38  
39  
40  
41  
42  
43  
44  
45  
46  
47  
48  
49  
50  
51  
52  
53  
54  
55  
56  
57  
58  
59  
60

## Introduction

Stroke, the third major cause of death, constitutes the largest cause of acquired disability in Japan [1]. According to a report of the Ministry of Health, Labor and Welfare, about 123,400 people died from stroke in 2010. About 10.3% of the total national death resulted from stroke. Sustained exposure to risk factors associated with lifestyle which patients live in play an important role in stroke incidence. Stroke is regarded as one of the diseases developed by long lasting exposure to risk factors associated with lifestyle. The incidence, as well as mortality, should be greatly affected by society, regions and times [2 3]. The updated detailed information on stroke events in each society is required. A long-term surveillance of stroke, comparing characteristics, risk factors, and mortality, based on the entire population in a prefecture as large as Kyoto, which has about 2,630,000 residents, should provide a fundamental database of stroke. Stroke consists of three major distinct subtypes, namely, cerebral infarction (CI), cerebral hemorrhage (CH), and subarachnoid hemorrhage (SAH). Although these subtypes, as disorders of the cerebral arteries, have many things in common, distinct characteristics prevail. Quantitative measurement of these differences in the same large cohort should help characterize three stroke subtypes [4]. The strength of comparing

1  
2  
3  
4  
5  
6 these three stroke subtypes in the same large cohort is that, by doing so, we can evaluate  
7  
8  
9 the relative strength of the risk factors influencing each subtype. These data also should  
10  
11  
12 help confirm a higher mortality rate in hemorrhagic stroke than ischemic stroke, and  
13  
14  
15 elucidate hazard ratios for death estimated simultaneously among major stroke subtypes,  
16  
17  
18 which should reflect relative severities of stroke.  
19

20  
21  
22  
23  
24 The Kyoto prefecture of Japan has established a registry to enroll all new  
25  
26  
27 stroke patients in cooperation with the Kyoto Medical Association and its affiliated  
28  
29  
30 hospitals with help from the data collecting agency known as the Kyoto Stroke Registry  
31  
32  
33 (KSR) [5]. We studied all patients registered during the past 11 years in the prefecture of  
34  
35  
36 Kyoto to document characteristics, risk factors, and hazard ratios in the three major  
37  
38  
39 stroke subtypes.  
40  
41  
42  
43  
44

## 45 **Methods**

46  
47  
48  
49  
50 We analyzed all stroke patients identified from January 1999 to December  
51  
52  
53 2009 in the entire Kyoto prefecture and registered in the KSR run by the local  
54  
55  
56 government of Kyoto prefecture. **The Kyoto Medical Association distributed the**  
57  
58  
59

1  
2  
3  
4  
5  
6 registration forms to the affiliated medical institutions and collected the data. A  
7  
8  
9 total of 151 hospitals have registered patients.

10  
11  
12  
13  
14 We supplied the summary of Kyoto Stroke Registry Program in supplementary  
15  
16  
17  
18 Table 1 A. This summary has been distributed to all hospitals affiliated to the  
19  
20  
21  
22  
23  
24  
25  
26  
27  
28  
29  
30  
31  
32  
33  
34  
35  
36  
37  
38  
39  
40  
41  
42  
43  
44  
45  
46  
47  
48  
49  
50  
51  
52  
53  
54  
55  
56  
57  
58  
59  
60  
Kyoto Medical Association and to public health centers in Kyoto Prefecture. It is  
also attached to the annual reports published by Kyoto Prefecture.

The diagnosis of stroke was confirmed by local neurologists and/or neurosurgeons  
based on the WHO definition [6]. **Stroke patients who lived in Kyoto prefecture were  
registered regardless to their age and sex. Conditions such as shock, Adam-Strokes  
Syndrome or hypertensive encephalopathy are excluded as they are not caused  
directly by cerebrovascular events. TIA is also excluded as the symptoms cease  
within 24 hours after onset. Differential diagnoses are made by attending  
physicians based on CT/MRI images and other clinical examinations. Inclusion  
and exclusion criteria for KSR were shown in supplementary Table 1B.**

We classified the patients into CI (ICD-9 code 433 and 434, ICD-10 code I63), CH

1  
2  
3  
4  
5  
6 (ICD-9 code 431, ICD-10 code I61), SAH (ICD-9 code 430, ICD-10 code I60) [7 8] and  
7  
8  
9 others by neurological examination and the findings of CT scans, MRI scans,  
10  
11 angiographies, and scintigraphies. **In order to clarify trends over time, we also**  
12  
13 **divided the study cohort into two groups, Group-A and Group-B, according to the**  
14  
15 **date of onset of the event. Group-A comprises patients who developed stroke**  
16  
17 **between January 1999 and June 2004, and Group-B comprises patients who**  
18  
19 **developed stroke between July 2004 and December 2009. We showed differences**  
20  
21 **between the two groups and, using multivariate analyses, calculated hazard ratios**  
22  
23 **for death comparing the two groups.**  
24  
25  
26  
27  
28  
29  
30  
31  
32  
33  
34

35 Each registry recorded age, sex, date of stroke onset, blood pressure and arrhythmia on  
36  
37 arrival, history of hypertension, arrhythmia, diabetes mellitus and hyperlipemia, tobacco  
38  
39 and alcohol use, type of paresis, consciousness levels and clinical outcome 30 days after  
40  
41 the onset.  
42  
43  
44

45  
46 For the purpose of this entry, we used the following definitions.  
47

- 48 1) Systolic and diastolic hypertension: blood pressure exceeding 140 and 90 mmHg,  
49
- 50 2) Arrhythmia: any types of irregularity,  
51
- 52 3) Diabetes mellitus: both type 1 and type 2 based on the patient medical record,  
53  
54  
55  
56  
57  
58  
59  
60



- 1  
2  
3  
4  
5  
6 4) Hyperlipemia: serum cholesterol level of 220 mg/dl or higher and/or triglyceride  
7  
8 exceeding 150mg/dl,  
9  
10  
11  
12 5) Smoking: divided into four categories, non smokers, and former smokers for more  
13  
14 than a year, light smokers with 20 or less cigarettes a day and heavy smokers with  
15  
16 more than 20 cigarettes a day.  
17  
18  
19  
20  
21 6) Alcohol consumption: divided into three categories, non drinkers, occasional  
22  
23 drinkers (less than three time a week), and daily drinkers (more than four times a  
24  
25 week).  
26  
27  
28  
29 7) Paresis: any distribution including unilateral or bilateral limb or face,  
30  
31  
32 8) Consciousness levels onset based on the Japan Coma Scale (JCS) [9] [10], the most  
33  
34 widely used Japanese scale composed of the four levels,  
35  
36  
37 1; JSC 0 (alert),  
38  
39  
40 2; JCS 1-digit code (disoriented but awake),  
41  
42  
43 3; JCS 2-digit code (arousable with stimulation),  
44  
45  
46 4; JSC 3-digit code (unarousable)  
47  
48  
49  
50  
51

### 52 *Statistical Analysis*

53  
54  
55  
56  
57  
58  
59  
60

1  
2  
3  
4  
5  
6 Statistical analyses used include Fisher exact tests for frequencies of listed  
7  
8 characteristics among the three stroke types, Student-t test for such numerical variables  
9  
10 as age and systolic- and diastolic-blood pressures, a log-rank test for Kaplan-Meier  
11  
12 curves of estimated survival. The Mantel-Haenszel method and a logistic regression  
13  
14 model were used to estimate univariate and multivariate odds ratios. Cox proportional  
15  
16 hazards regression was used to calculate age-, sex-, systolic and diastolic blood  
17  
18 pressure-, and consciousness levels-adjusted hazard ratios and their 95% confidence  
19  
20 intervals for the risk of death. Analyses were performed using SPSS ver.19 and  
21  
22 statistical significance was set at  $p < 0.05$ . All reported p values are 2-sided.  
23  
24  
25  
26  
27  
28  
29  
30  
31  
32  
33  
34

### 35 ***Ethics Statement***

36  
37  
38 This research was performed in accordance with the ethical principles for medical  
39  
40 research involving human subjects outlined in the Declaration of Helsinki. This research  
41  
42 was approved by the Board of Directors, the Kyoto Medical Association, the  
43  
44 Department of Health and Welfare, Kyoto Prefecture and Ethics Committee of the  
45  
46 National Hospital Organization, Minami Kyoto Hospital. Since all identifying personal  
47  
48 information was stripped from the secondary files before analysis, the boards waived  
49  
50 the requirement for written informed consent from the patients involved.  
51  
52  
53  
54  
55  
56  
57  
58  
59  
60

## Results

We reviewed 14,268 stroke patients newly identified in Kyoto prefecture from January 1999 to December 2009. Of these 12,774 (89.5%), 9,232 (64.7%), 2,504 (17.5%), and 342 (2.4%) underwent CT, MRI scan, angiography, and scintigraphy for blood flow. Excluding 480 (3.3%) unclassified patients, 13,788 (96.6%) patients formed the basis of further analyses dividing then into three subtypes of stroke, CI, CH, and SAH categories.

The study cohort had 13,788 patients divided into 9,011 (65.4%) CI, 3,549 (25.7%) CH and 1,197 (8.7%) SAH cases. A small number of patients had a combination of stroke types as follows: 12 with CI and CH, 4 with CI and SAH, and 15 with CH and SAH. Table 1 summarizes the characteristics, risk factors, symptoms, and mortality rate.

Table 1 Characteristics of Stroke Patients (n=13,788)

| Overall | Cerebral<br>infarction | Cerebral<br>hemorrhage | Subarachnoid<br>hemorrhage |
|---------|------------------------|------------------------|----------------------------|
|         | n=9,011                | n=3,549                | n=1,197                    |

|                        |                    | (65.4%)                        | (25.7%)                         | (8.7%)                      |
|------------------------|--------------------|--------------------------------|---------------------------------|-----------------------------|
| <b>Age (mean± SD)</b>  | 71.3 (12.9)        | 73.3<br>(11.8) <sup>*1*3</sup> | 69.1 (13.6)<br><sup>*1*2</sup>  | 62.7 (13.5) <sup>*2*3</sup> |
| <b>Sex, % female</b>   | 45.2 (6,233:7,555) | 42.3 <sup>*1*3</sup>           | 45.9 <sup>*1*2</sup>            | 64.6 <sup>*2*3</sup>        |
| <b>(n=female:</b>      |                    | (3,815:5,196)                  | (1,630:1,919)                   | (773:424)                   |
| <b>male)</b>           |                    |                                |                                 |                             |
| <b>Systolic blood</b>  | 161.3 (35.5)       | 157.5<br>(28.3) <sup>*1</sup>  | 172.1 (34.8)<br><sup>*1*2</sup> | 157.9 (37.0) <sup>*2</sup>  |
| <b>pressure (mean±</b> |                    |                                |                                 |                             |
| <b>SD), mmHg</b>       |                    |                                |                                 |                             |
| <b>Diastolic blood</b> | 87.6 (18.63)       | 85.6 (17.0)<br><sup>*1*3</sup> | 93.1 (21.1)<br><sup>*1*2</sup>  | 86.8 (21.8) <sup>*2*3</sup> |
| <b>pressure (mean±</b> |                    |                                |                                 |                             |
| <b>SD), mmHg</b>       |                    |                                |                                 |                             |
| <b>Hypertension</b>    | 62.6 (8,005:4,780) | 62.0 <sup>*1*3</sup>           | 68.5 <sup>*1*2</sup>            | 49.9 <sup>*2*3</sup>        |
| <b>history, %</b>      |                    | (5,285:3,242)                  | (2,183:1,006)                   | (520:522)                   |
| <b>(n=with:</b>        |                    |                                |                                 |                             |
| <b>without)</b>        |                    |                                |                                 |                             |
| <b>Arrhythmia, %</b>   | 14.5               | 18.9 <sup>*1*3</sup>           | 5.9 <sup>*1*2</sup>             | 7.2 <sup>*2*3</sup>         |
| <b>(n=with:</b>        | (1,932:11,352)     | (1,647:7,064)                  | (200:3,209)                     | (82:1,052)                  |

|                       |                    |                            |                            |                            |
|-----------------------|--------------------|----------------------------|----------------------------|----------------------------|
| <b>without)</b>       |                    |                            |                            |                            |
| <b>Arrhythmia</b>     | 18.5(2,357:10,415) | 24.3 <sup>*1*3</sup>       | 7.5 <sup>*1*2</sup>        | 5.3 <sup>*2*3</sup>        |
| <b>history, %</b>     |                    | (2,060:6,432)              | (240:2,971)                | (55:985)                   |
| <b>(n=with:</b>       |                    |                            |                            |                            |
| <b>without)</b>       |                    |                            |                            |                            |
| <b>Diabetes</b>       | 20.9               | 24.8 <sup>*1*3</sup>       | 14.8 <sup>*1*2</sup>       | 6.9 <sup>*2*3</sup>        |
| <b>mellitus</b>       | (2,689:10,198)     | (2,138:6,475)              | (474:2,738)                | (71:963)                   |
| <b>history, %</b>     |                    |                            |                            |                            |
| <b>(n=with:</b>       |                    |                            |                            |                            |
| <b>without)</b>       |                    |                            |                            |                            |
| <b>Hyperlipemia</b>   | 19.2               | 23.1 <sup>*1*3</sup>       | 11.9 <sup>*1*2</sup>       | 9.2 <sup>*2*3</sup>        |
| <b>history, %</b>     | (2,419:10,198)     | (1,951:6,503)              | (371:2,755)                | (93:918)                   |
| <b>(n=with:</b>       |                    |                            |                            |                            |
| <b>without)</b>       |                    |                            |                            |                            |
| <b>Tobacco use, %</b> | 32.4 (3,665:7,642) | 32.6 <sup>*1*3</sup>       | 30.1 <sup>*1*2</sup>       | 37.1 <sup>*2*3</sup>       |
| <b>(n=with:</b>       |                    | (2,455:5,077)              | (843:1,956)                | (354:599)                  |
| <b>without)</b>       |                    |                            |                            |                            |
| <b>Non smoker, %</b>  | 67.6 (7,642)       | 67.4 (5,077) <sup>*3</sup> | 69.9 (1,956) <sup>*2</sup> | 62.9 (599) <sup>*2*3</sup> |

|                 |                    |                              |                            |                            |
|-----------------|--------------------|------------------------------|----------------------------|----------------------------|
| (n)             |                    |                              |                            |                            |
| Former          | 5.4 (615)          | 5.8 (435) <sup>*3</sup>      | 5.7 (159) <sup>*2</sup>    | 2.1 (20) <sup>*2*3</sup>   |
| smoker, % (n)   |                    |                              |                            |                            |
| Light smoker, % | 17.0 (1,918)       | 17.0 (1,281) <sup>*1*3</sup> | 14.6 (409) <sup>*1*2</sup> | 23.3 (222) <sup>*2*3</sup> |
| (n)             |                    |                              |                            |                            |
| Heavy smoker, % | 10.0 (1,132)       | 9.8 (739)                    | 9.8 (275)                  | 11.8 (112)                 |
| (n)             |                    |                              |                            |                            |
| Alcohol use, %  | 38.0 (4,202/6,851) | 36.3 <sup>*1*3</sup>         | 40.5 <sup>*1*2</sup>       | 43.6 <sup>*2*3</sup>       |
| (n=with:        |                    | (2,654:4,655)                | (1,124:1,650)              | (412:533)                  |
| without)        |                    |                              |                            |                            |
| Non drinker, %  | 62.0 (6,851)       | 63.7 (4,655) <sup>*1*3</sup> | 59.5 (1,650) <sup>*1</sup> | 56.4 (533) <sup>*3</sup>   |
| (n)             |                    |                              |                            |                            |
| Occasional      | 15.3 (1,692)       | 15.5 (1,131) <sup>*1*3</sup> | 13.5 (374) <sup>*1*2</sup> | 18.9 (179) <sup>*2*3</sup> |
| drinker, % (n)  |                    |                              |                            |                            |
| Every day       | 22.7 (2,510)       | 20.8 (1,523) <sup>*1*3</sup> | 27.0 (750) <sup>*1</sup>   | 24.7 (233) <sup>*3</sup>   |
| drinker, % (n)  |                    |                              |                            |                            |
| Paresis, %      | 73.3 (9,670:3,525) | 76.8 <sup>*1*3</sup>         | 78.5 <sup>*1*2</sup>       | 26.8 <sup>*2*3</sup>       |
| (n=with:        |                    | (6,750:2,041)                | (2,624:717)                | (277:756)                  |

|                        |                     |                              |                              |                            |
|------------------------|---------------------|------------------------------|------------------------------|----------------------------|
| <b>without)</b>        |                     |                              |                              |                            |
| <b>Consciousness</b>   | 43.5 (5,914: 7,676) | 31.8 <sup>*1*3</sup>         | 65.7 <sup>*1</sup> (2,305:   | 65.1 <sup>*3</sup> (775:   |
| <b>disturbance, %</b>  |                     | (2,815:                      | 1,201)                       | 415)                       |
| <b>(n=with:</b>        |                     | 8,863)                       |                              |                            |
| <b>without)</b>        |                     |                              |                              |                            |
| <b>JCS 0, % (n)</b>    | 55.7 (7,676)        | 67.1 <sup>*1*3</sup> (6,048) | 33.8 <sup>*1*2</sup> (1,201) | 35.6 <sup>*2*3</sup> (415) |
| <b>JSC 1-digit</b>     | 19.0 (2,619)        | 16.7 <sup>*1</sup> (1,508)   | 26.0 <sup>*1*2</sup> (921)   | 15.9 <sup>*2</sup> (185)   |
| <b>code, % (n)</b>     |                     |                              |                              |                            |
| <b>JSC 2-digit</b>     | 11.6 (1,602)        | 8.6 <sup>*1*3</sup> (774)    | 17.5 <sup>*1</sup> (622)     | 16.7 <sup>*3</sup> (200)   |
| <b>code, % (n)</b>     |                     |                              |                              |                            |
| <b>JSC 3-digit</b>     | 10.9 (1,509)        | 4.7 <sup>*1*3</sup> (421)    | 20.2 <sup>*1*2</sup> (716)   | 30.5 <sup>*2*3</sup> (365) |
| <b>code, % (n)</b>     |                     |                              |                              |                            |
| <b>JSC</b>             | 1.3 (184)           | 1.2 <sup>*3</sup> (112)      | 1.3 <sup>*2</sup> (46)       | 2.1 <sup>*2*3</sup> (25)   |
| <b>undetermined, %</b> |                     |                              |                              |                            |
| <b>(n)</b>             |                     |                              |                              |                            |
| <b>Delay time</b>      | 3.91±4.82           | 4.20±5.21                    | 3.50±4.13                    | 3.13±3.77                  |
| <b>(mean± SD)</b>      |                     |                              |                              |                            |
| <b>CT, % (n)</b>       | 89.7 (12,365)       | 85.1 (7,668)                 | 98.2 (3,485) <sup>*1</sup>   | 98.8 (1,183) <sup>*3</sup> |

|                          |                     |              |              |                 |
|--------------------------|---------------------|--------------|--------------|-----------------|
|                          |                     |              | *1*3         |                 |
| <b>MRI, % (n)</b>        | 64.5 (8,891)        | 79.8 (7,148) | 40.3 (1,429) | 25.1 (300) *1*3 |
|                          |                     | *1*3         | *1*2         |                 |
| <b>Surgery %</b>         | 16.0 (2,171:11,399) | 4.2          | 26.1         | 74.6 (871:297)  |
| <b>(n=with: without)</b> |                     | (374:8,495)  | (915:2,588)  | *1*3            |
|                          |                     | *1*3         | *1*2         |                 |
| <b>Mortality, %</b>      | 9.8 (1,344:12,391)  | 5.2 *1*3     | 15.2 *1*2    | 28.4 *2*3       |
| <b>(n=dead: alive)</b>   |                     | (467:8,981)  | (536:2,997)  | (338:853)       |

When the numbers entered in the table above are significantly different between different types of strokes, they are marked as follows:

\*1: significant difference between cerebral infarction and cerebral hemorrhage;

\*2: sig. difference between cerebral hemorrhage and subarachnoid hemorrhage;

\*3: sig. difference between subarachnoid hemorrhage and cerebral infarction;

SD = Standard Deviation

**Temporal trends of characteristics of stroke patients, comparing Group-A and Group-B, are summarized in Table 2 and hazard ratios for death, comparing the**



two groups are summarized in Table 3. Characteristics of stroke patients in

Group-A and Group-B are summarized in supplementary Table 3.

Table 2 Temporal trends of characteristics of stroke patients, comparing Group-A and Group-B

|                                                 | Group-A               | Group-B               | P      | Difference/OR                            |
|-------------------------------------------------|-----------------------|-----------------------|--------|------------------------------------------|
| Age (mean± SD)                                  | 70.5±12.7             | 72.3±13.0             | <0.001 | -1.85<br>(-2.28~-1.41)<br>* <sup>1</sup> |
| Sex, % female<br>(n=female:<br>male)            | 44.8<br>(3,531;4,349) | 45.7<br>(2,702;3,206) | 0.505  | 1.02<br>(0.96~1.09)* <sup>2</sup>        |
| Systolic blood<br>pressure (mean±<br>SD), mmHg  | 161.5±31.6            | 161±31.5              | 0.449  | 0.41<br>(-0.66~1.49)* <sup>1</sup>       |
| Diastolic blood<br>pressure (mean±<br>SD), mmHg | 87.3±18.7             | 88.0±19.0             | 0.036  | -0.69<br>(-1.33~-0.05)* <sup>1</sup>     |

|                      |                      |                      |                  |                                  |
|----------------------|----------------------|----------------------|------------------|----------------------------------|
| <b>Hypertension</b>  | <b>60.2</b>          | <b>65.9</b>          | <b>&lt;0.001</b> | <b>1.19~1.38<sup>*2</sup></b>    |
| <b>history, %</b>    | <b>(4,379:2,900)</b> | <b>(3,626:1,880)</b> |                  |                                  |
| <b>(n=with:</b>      |                      |                      |                  |                                  |
| <b>without)</b>      |                      |                      |                  |                                  |
| <b>Arrhythmia, %</b> | <b>14.9</b>          | <b>14.0</b>          | <b>0.079</b>     | <b>0.92</b>                      |
| <b>(n=with:</b>      | <b>(1,132:6,446)</b> | <b>(800:4,906)</b>   |                  | <b>(0.83~1.01) <sup>*2</sup></b> |
| <b>without)</b>      |                      |                      |                  |                                  |
| <b>Arrhythmia</b>    | <b>19.0 (74.7)</b>   | <b>17.7</b>          | <b>0.059</b>     | <b>0.92</b>                      |
| <b>history, %</b>    |                      | <b>(974:4,531)</b>   |                  | <b>(0.84~1.00) <sup>*2</sup></b> |
| <b>(n=with:</b>      |                      |                      |                  |                                  |
| <b>without)</b>      |                      |                      |                  |                                  |
| <b>Diabetes</b>      | <b>20.5</b>          | <b>21.4</b>          | <b>0.327</b>     | <b>1.04</b>                      |
| <b>mellitus</b>      | <b>(1,500:5,827)</b> | <b>(1,189:4,371)</b> |                  | <b>(0.96~1.14) <sup>*2</sup></b> |
| <b>history, %</b>    |                      |                      |                  |                                  |
| <b>(n=with:</b>      |                      |                      |                  |                                  |
| <b>without)</b>      |                      |                      |                  |                                  |
| <b>Hyperlipemia</b>  | <b>17.5</b>          | <b>21.4</b>          | <b>&lt;0.001</b> | <b>1.27</b>                      |
| <b>history, %</b>    | <b>(1,250:5,910)</b> | <b>(1,169:4,288)</b> |                  | <b>(1.16~1.39) <sup>*2</sup></b> |

|                |               |               |        |                              |
|----------------|---------------|---------------|--------|------------------------------|
| (n=with:       |               |               |        |                              |
| without)       |               |               |        |                              |
| Tobacco use, % | 33.6          | 30.9          | 0.001  | 0.88                         |
| (n=with:       | (2,152:4,259) | (1,513:3,383) |        | (0.81~0.95) * <sup>2</sup>   |
| without)       |               |               |        |                              |
| Alcohol use, % | 39.5          | 36.1 (1,724)  | 0.002  | 0.89                         |
| (n=with:       | (2,478:3,797) |               |        | (0.82~0.96) * <sup>2</sup>   |
| without)       |               |               |        |                              |
| Paresis, %     | 73.7          | 72.7          | 0.116  | 0.94                         |
| (n=with:       | (5,581:1,987) | (4,087:1,534) |        | (0.87~1.02) * <sup>2</sup>   |
| without)       |               |               |        |                              |
| Consciousness  | 42.4          | 45.0          | 0.055  | 1.07                         |
| disturbance, % | (3,290:4,463) | (2,624:3,207) |        | (1.00~1.14) * <sup>2</sup>   |
| (n=with:       |               |               |        |                              |
| without)       |               |               |        |                              |
| Delay time     | 4.15±5.03     | 3.60±4.54     | <0.001 | -0.55                        |
| (mean± SD)     |               |               |        | (-0.73~-0.38) * <sup>1</sup> |
| CT, % (n)      | 92.4 (7,285)  | 86.1 (5,080)  | <0.001 | 0.51                         |

|                        |                        |                     |                  |                                  |
|------------------------|------------------------|---------------------|------------------|----------------------------------|
|                        |                        |                     |                  | (0.45~0.57) * <sup>2</sup>       |
| <b>MRI, % (n)</b>      | <b>59.4 (4,682)</b>    | <b>71.3 (4,209)</b> | <b>&lt;0.001</b> | <b>1.68</b>                      |
|                        |                        |                     |                  | (1.56~1.80) * <sup>2</sup>       |
| <b>Surgery %</b>       | <b>17.6</b>            | <b>13.9</b>         | <b>&lt;0.001</b> | <b>0.76</b>                      |
| <b>(n=with:</b>        | <b>(1,356:6,339)</b>   | <b>(815:5,060)</b>  |                  | <b>(0.69~0.83) *<sup>2</sup></b> |
| <b>without)</b>        |                        |                     |                  |                                  |
| <b>Mortality, %</b>    | <b>9.5 (745:7,097)</b> | <b>10.2</b>         | <b>0.771</b>     | <b>1.02</b>                      |
| <b>(n=dead: alive)</b> |                        | <b>(599:5,294)</b>  |                  | <b>(0.91~1.14) *<sup>2</sup></b> |

\*<sup>1</sup>Mean difference (95% confidence interval of the difference)

\*<sup>2</sup>Mantel-Haenszel common odds ratio (95% confidence interval)

OR= Odds Ratio

**Table 3 Hazard Ratios for death, comparing Group-A and Group-B**

|  | Hazard Ratio<br>(Group-B/Group-A) | 95% Confidence Interval |             | p |
|--|-----------------------------------|-------------------------|-------------|---|
|  |                                   | Lower                   | Upper       |   |
|  |                                   | <b>Over all</b>         | <b>1.33</b> |   |

|                                |             |             |             |              |
|--------------------------------|-------------|-------------|-------------|--------------|
| <b>Cerebral infarction</b>     | <b>1.33</b> | <b>1.04</b> | <b>1.70</b> | <b>0.021</b> |
| <b>Cerebral hemorrhage</b>     | <b>1.06</b> | <b>0.83</b> | <b>1.34</b> | <b>0.650</b> |
| <b>Subarachnoid hemorrhage</b> | <b>1.25</b> | <b>0.92</b> | <b>1.70</b> | <b>0.147</b> |

**Adjusted for age, sex, histories of hypertension, arrhythmia, diabetes mellitus and hyperlipemia, and uses of tobacco and alcohol**

**Odds ratios for the prevalence of risk factors among stroke subtypes, adjusted for age and sex, were calculated using a logistic regression model and are summarized in Table 3.**

**Table 4 Odds Ratios for the prevalence of risk factors among stroke subtypes, adjusted for age and sex**

|                                 | Odds Ratio       | 95% Confidence Interval |             | p                |
|---------------------------------|------------------|-------------------------|-------------|------------------|
|                                 |                  | Lower                   | Upper       |                  |
| <b>History of hypertension</b>  |                  |                         |             |                  |
| <b>Cerebral infarction (CI)</b> | <b>Reference</b> |                         |             |                  |
| <b>Cerebral hemorrhage (CH)</b> | <b>1.36</b>      | <b>1.25</b>             | <b>1.49</b> | <b>&lt;0.001</b> |

|                                          |                  |             |             |                  |
|------------------------------------------|------------------|-------------|-------------|------------------|
| <b>Subarachnoid hemorrhage<br/>(SAH)</b> | <b>0.65</b>      | <b>0.57</b> | <b>0.74</b> | <b>&lt;0.001</b> |
| <b>History of arrhythmia</b>             |                  |             |             |                  |
| <b>CI</b>                                | <b>Reference</b> |             |             |                  |
| <b>CH</b>                                | <b>0.28</b>      | <b>0.24</b> | <b>0.33</b> | <b>&lt;0.001</b> |
| <b>SAH</b>                               | <b>0.26</b>      | <b>0.19</b> | <b>0.34</b> | <b>&lt;0.001</b> |
| <b>History of diabetes mellitus</b>      |                  |             |             |                  |
| <b>CI</b>                                | <b>Reference</b> |             |             |                  |
| <b>CH</b>                                | <b>0.49</b>      | <b>0.44</b> | <b>0.55</b> | <b>&lt;0.001</b> |
| <b>SAH</b>                               | <b>0.20</b>      | <b>0.16</b> | <b>0.26</b> | <b>&lt;0.001</b> |
| <b>History of hyperlipemia</b>           |                  |             |             |                  |
| <b>CI</b>                                | <b>Reference</b> |             |             |                  |
| <b>CH</b>                                | <b>0.40</b>      | <b>0.35</b> | <b>0.45</b> | <b>&lt;0.001</b> |
| <b>SAH</b>                               | <b>0.24</b>      | <b>0.19</b> | <b>0.30</b> | <b>&lt;0.001</b> |

Table 1 also shows historical account on hypertension in 12,785 (92.7%), arrhythmia in 12,772 (92.6%), diabetes mellitus in 12,887 (93.5%), hyperlipemia in 12,617 (91.5%),

1  
2  
3  
4  
5  
6 tobacco usage in 11,307 (82.0%), alcohol usage in 11,053 (80.2%), and paresis in  
7  
8  
9 13,195 (96.7%). We were able to classify 13,406 (97.2%) patients into four  
10  
11 consciousness levels, excluding 184 (1.3%) patients with uncategorized stroke and 580  
12  
13 (4.2%) patients with no reliable information on conscious levels. Calculation of the  
14  
15 mean delay time excluded 4964 (36.0%) patients of unknown onset. Patients received  
16  
17 primary medical care within 3 hours of CI in 54.3%, of CH in 68.5% in CH, and of  
18  
19 SAH in 76.4%.  
20  
21  
22  
23  
24

25  
26 Of 13,788 patients, 13,735 (99.6%) had a confirmed record of survival or death  
27  
28 30 days after stroke onset. A total of 1,344 (9.8%) patients died within this time period.  
29  
30  
31

32 Figure 1 shows Kaplan-Meier Survival curves, comparing stroke subtypes,  
33  
34 showing a significant difference ( $p < 0.001$ ) between any two subtypes based on  
35  
36 Log-rank tests.  
37  
38

39  
40 Compared to CI, CH and SAH hazard ratios for fatality of 3.66 (3.07-4.37),  
41  
42 and 8.91 (7.18-11.06)  $p < 0.001$ , when adjusted for age, sex, histories of hypertension,  
43  
44 arrhythmia, diabetes mellitus and hyperlipemia and uses of tobacco and alcohol,  
45  
46 showing significant differences ( $p < 0.001$ ) (Table 5).  
47  
48  
49  
50  
51  
52  
53  
54

55 **Table 5 Hazard ratios for death, comparing stroke subtypes**  
56  
57  
58

|                                | HR               | 95% Confidence Interval |              | p                |
|--------------------------------|------------------|-------------------------|--------------|------------------|
|                                |                  | Lower                   | Upper        |                  |
| <b>Cerebral infarction</b>     | <b>Reference</b> |                         |              |                  |
| <b>Cerebral hemorrhage</b>     | <b>3.66</b>      | <b>3.07</b>             | <b>4.37</b>  | <b>&lt;0.001</b> |
| <b>Subarachnoid hemorrhage</b> | <b>8.91</b>      | <b>7.18</b>             | <b>11.06</b> | <b>&lt;0.001</b> |

**Adjusted for age, sex, histories of hypertension, arrhythmia, diabetes mellitus and hyperlipemia, and uses of tobacco and alcohol**

**Hazard ratios for death, comparing stroke subtypes, in Group-A and Group-B are summarized in Supplementary Table 4 A and B.**

## **Discussion**

The study summarized the stroke registry covering entire prefecture for 11 years. Such data set depends on the society and the times. Hospitals affiliated to the Kyoto Medical Association registered new stroke patients based on the inclusion and



1  
2  
3  
4  
5  
6 exclusion criteria in accordance with the Kyoto municipal ordinance, avoiding area or  
7  
8 hospitals preferences.  
9

10  
11  
12  
13  
14 **One of the major purposes of these prefectural stroke registries is to clarify the**  
15 **current situation of stroke events in order to maintain and improve health care**  
16 **system in the prefecture. In Japan, health care systems largely depend on each**  
17 **prefectural government, and therefore information on each prefecture is important.**  
18  
19 **Japan has 47 prefectures. To our knowledge, there are five stroke registries based**  
20 **on a population in the entire prefecture in recent years; Akita Stroke Registry**  
21 **(ASR) [11-14], Iwate Stroke Registry (ISR) [15], Tochigi Stroke Registry (TSR)**  
22 **[16 17], Miyazaki Stroke Registry (MSR) [18] and KSR. Although each**  
23 **prefectural registry reported the result annually to the local government, to health**  
24 **care centers, and to the public, most of them are not available in English literature.**  
25  
26 **We summarized incidence information based on KSR in supplementary Tables 2 A,**  
27 **B and C. ASR has been published age-adjusted gender specific incidence. Although**  
28 **we could not find age-adjusted gender specific incidence among the other**  
29 **prefectural stroke registries, TSR and MSR reported data on numbers of patients**  
30 **they registered. We calculated age-adjusted gender specific incidence in TSR and**  
31  
32  
33  
34  
35  
36  
37  
38  
39  
40  
41  
42  
43  
44  
45  
46  
47  
48  
49  
50  
51  
52  
53  
54  
55  
56  
57  
58  
59  
60

1  
2  
3  
4  
5  
6 MSR based on their annual report and summarized them in supplementary Tables  
7  
8  
9 2 D, E, F, G, H and I. ISR says that their reports will be ready [19]. All the  
10  
11 prefectural registries ask as many hospitals and facilities to register all the stroke  
12  
13 events as possible. Registration, however, is not mandatory but depends on  
14  
15 voluntary contributions of hospitals. Some hospitals might be difficult to  
16  
17 undertake this social work. Therefore, registries on more restricted area should be  
18  
19 more suitable to clarify stroke incidence in a community. The incidence rates of  
20  
21 stroke reported from the Takashima Stroke Registry [20-22] and the Hisayama  
22  
23 Study [23-25] are higher than those from the prefectural stroke registries. The  
24  
25 Hisayama study is reported to examine about 80 % residents (at age of 40 or over)  
26  
27 of the area, which has a population of about 8,400 [26]. Age-standardized incidence  
28  
29 rates (per 10,000 person-years) of stroke in the 3<sup>rd</sup> cohort (1988-2000) of the  
30  
31 Hisayama Study are 529 in men and 388 in women [23]. Among subtypes of stroke,  
32  
33 they are 357:77, 130:21 and 42:13 (men: women) in cerebral infarction, cerebral  
34  
35 hemorrhage and subarachnoid hemorrhage, respectively [23].  
36  
37  
38  
39  
40  
41  
42  
43  
44  
45  
46  
47  
48  
49  
50  
51

52 The average annual mortality of cerebral hemorrhage is 3.9 per 1,000 PYE  
53  
54  
55 whereas that of cerebral infarction is 6.5 in Hisayama population aged 40 and over  
56  
57  
58  
59  
60

1  
2  
3  
4  
5  
6 [11]. Some prefectural stroke registries reported mortality rates. In TSR, they  
7  
8  
9 were 10%, 16% and 29% in CI, CH and SAH, respectively [16]. According to ASR,  
10  
11  
12 survival rates were 94%, 92%, 83%, 84%, 70% and 70% in CI-men, CI-women,  
13  
14  
15 CH-men, CH-women, SAH-men and SAH-women, respectively [13 14], which  
16  
17  
18 generally agrees with the results of KSR. The present study added the age, sex,  
19  
20  
21 histories of hypertension, arrhythmia, diabetes and hyperlipemia, and uses of  
22  
23  
24 tobacco and alcohol adjusted hazard ratios for death in each stroke subtype.  
25  
26  
27

28  
29 In KSR, voluntary contribution mentioned above has built up a registry of 14,268  
30  
31  
32 stroke patients over 11 years. To be compared with the other prefectural registries,  
33  
34  
35 one of the outstanding strengths of KSR is that it has information on survival days  
36  
37  
38 up to 30 days after the onset in 13,735 patients out of 13,788 patients of this study  
39  
40  
41 cohort (99.6%). KSR makes it possible to analyse relationships between a certain  
42  
43  
44 factor and early mortality. Strengths of stroke registry in Japan include a high  
45  
46  
47 availability of CT and MRI. Japan has the most MRI units (40 U per million  
48  
49  
50 population) and CT scanners (93 U per million populations) among the developed  
51  
52  
53 countries [27]. In the study cohort, 12,365 patients (89.7%) had CT examination  
54  
55  
56 and 8,891 patients (64.5%) had MRI examination. The study added the  
57  
58  
59  
60

1  
2  
3  
4  
5  
6 **information on recent trends on usage of these examinations. As expected, but**  
7  
8  
9 **interestingly, the usage CT declined whereas the usage of MRI increased with time**  
10  
11 **during the study period of 11 years.**  
12  
13

14  
15  
16  
17  
18 In agree with previous reports, CI showed higher incidence followed by CH  
19  
20 and SAH, which constitutes a fourth of hemorrhagic strokes [24]. The result adds the  
21  
22 information that SAH constitutes about a fourth of hemorrhagic strokes. Age  
23  
24 distribution also confirm the result of previous reports, the oldest mean age in CH and  
25  
26 youngest in SAH [28]. The elderly patients showed a greater difference in proportion in  
27  
28 stroke subtypes. For example, in patients who were 71 years or older, the proportions  
29  
30 were 73.1% (n=5616), 22.3% (n=1709), and 4.6% (n=353), as compared to younger  
31  
32 group who showed 55.8% (n=3395), 30.3% (n=1840) and 13.9% (n=844).  
33  
34  
35  
36  
37  
38  
39

40  
41 Most of the other characteristics also showed significant difference among  
42  
43 three stroke subtypes. The overall registry had more male patients than female, except  
44  
45 almost two-thirds of SAH cases were female. The initial medical examination revealed  
46  
47 higher systolic and diastolic blood pressures in CH than in CI, possibly reflecting  
48  
49 intracranial mass effect on brain edema [29 30].  
50  
51  
52  
53  
54  
55  
56  
57  
58  
59  
60

1  
2  
3  
4  
5  
6 Patients with disturbed consciousness had a higher ( $p<0.001$ ) systolic/diastolic  
7  
8 blood pressure (mean  $\pm$  SD:  $164.0 \pm 35.2/88.6 \pm 20.9$ ) than the remainder ( $159.3 \pm$   
9  
10  $28.2/87.0 \pm 17.1$ ), implying possible association between stroke severity and degree of  
11  
12 hypertension.  
13  
14

15  
16 Risk factors for stroke include hypertension [31], arrhythmia [32], diabetes  
17  
18 mellitus [33 34], hyperlipemia [35], alcohol use [36 37], and tobacco use . Except for  
19  
20 tobacco and alcohol uses, these factors were noted most often in CI, followed by CH,  
21  
22 and least in SAH. Hypertension, probably plays the most important role, was found in  
23  
24 more than 60 % of all stroke patients. A history of arrhythmia and diabetes mellitus,  
25  
26 relatively high in CI and lower in CH, was rarely found in SAH. These data suggest a  
27  
28 limited association between these three factors and hemorrhagic strokes. The Ministry  
29  
30 of Health, Labour and Welfare of Japan, has estimated morbidity rates of hypertension,  
31  
32 diabetes mellitus and hyperlipemia among Japanese aged from 40 to 74 as 49.9%,  
33  
34 11.4% and 17.7%, respectively. In our series, a history of hypertension exceeded this  
35  
36 estimate in CI and CH. A history of diabetes mellitus was higher in CI and CH, but  
37  
38 lower in SAH, suggesting that this may not be a risk factor in SAH. A history of  
39  
40 hyperlipemia was also lower in SAH than the morbidity rate, also suggesting that this  
41  
42 may not a risk factor in SAH. **Regarding the risk factor of stroke, the data may not**  
43  
44  
45  
46  
47  
48  
49  
50  
51  
52  
53  
54  
55  
56  
57  
58  
59  
60

1  
2  
3  
4  
5  
6 **add sufficient information on the effect of risk factors on stroke occurrence. The**  
7  
8  
9 **registry data are not meant to do that type of study. The registry data, however, are**  
10  
11 **appropriate to present the prevalence of different risk factors among the stroke**  
12  
13 **patients. The higher prevalence of a factor in a certain group may support the**  
14  
15 **higher association between the factor and the group. This study added information**  
16  
17 **on the prevalence of risk factors among stroke patients and clarified the**  
18  
19 **differences among stroke subtypes. We also added multivariate analyses. Using a**  
20  
21 **logistic regression model, we estimated odds ratios and 95% confidence intervals**  
22  
23 **for the prevalence of these risk factors comparing each stroke subtype after**  
24  
25 **adjusted for age and sex.**  
26  
27  
28  
29  
30  
31  
32  
33  
34

35 Alcohol and tobacco use showed a higher correlation to SAH than the other  
36  
37 types in the surveillance conducted under the same conditions for the three subtypes of  
38  
39 stroke. Alcohol and tobacco usage may therefore increase the risk of SAH more than CI  
40  
41 or CH. The proportion of heavy smokers was not different among stroke subtypes,  
42  
43  
44 whereas the proportion of every day drinkers was higher in hemorrhagic strokes than in  
45  
46  
47 ischemic stroke. Paresis developed more often in CI and CH compared to SAH.  
48  
49  
50 Hemorrhagic stroke caused consciousness disturbance more than ischemic stroke.  
51  
52  
53  
54  
55  
56  
57  
58  
59  
60

1  
2  
3  
4  
5  
6 **The characteristics significantly different between Group-A and Group-B**  
7  
8  
9 **were age, diastolic blood pressure, histories of hypertension and hyperlipemia,**  
10  
11 **tobacco and alcohol use, delay time and surgery. Hazard ratio for death in cerebral**  
12 **infarction was significantly higher in Group-B than that in Group-A after adjusted**  
13 **for age, sex, histories of risk factors and uses of tobacco and alcohol.**  
14  
15  
16  
17  
18  
19  
20  
21  
22

23 We calculated mortality based on the information up to 30 days after the stroke  
24 onset, excluding those who died later. Early mortality indicates stroke events themselves,  
25  
26  
27  
28  
29  
30  
31  
32  
33  
34  
35  
36  
37  
38  
39  
40  
41  
42  
43  
44  
45  
46  
47  
48  
49  
50  
51  
52  
53  
54  
55  
56  
57  
58  
59  
60

41 **The mortality rate of ischemic stroke and risk characteristics must vary by its**  
42 **subtypes, such as embolic stroke and lacunar stroke. However, sufficient**  
43 **information to classify ischemic stroke into more detailed categories was not**  
44 **available in this study.**  
45  
46  
47  
48  
49  
50  
51  
52  
53  
54  
55  
56  
57  
58  
59  
60

### *Limitations*

**Firstly**, there may be missing data for stroke patients; for example, patients who died before arriving to hospitals and patients who went to hospital outside of the prefecture. Patients with mild symptoms might not have visited hospitals and patients with atypical symptoms might not have been diagnosed as such, and subsequently might not have been registered [5].

**Secondary**, the study did not encompass the effects of therapeutic interventions, which must have affected on mortality. It is virtually impossible to adjust all the treatments in a very large population based study. Treatments should be studied in randomized controlled studies. The causes of death in the study cohort were not investigated either. Possible bias exists in the assessment of variables, such as history of habits, which largely depend on patients' self report or information from their families. The study, however, showed the overall characteristics and mortality in stroke and in major subtypes, which should shed light on the difference among the major subtypes as a whole, since the comparison was done otherwise in the same condition.

**Lastly**, the outcomes assessment limited to 30 days after onset leaves the majority of patients (n=11,869, 86.1%) who survived the first month out of consideration. However,



1  
2  
3  
4  
5  
6 early mortality evaluation within 30-day should reflect cause of death directly  
7  
8  
9 associated with stroke and therefore correlate severity in more direct way.  
10

11  
12  
13  
14 Major conclusions of the study should prevail as a report based on a very large number  
15  
16  
17 of patients analyzed under the same conditions.  
18  
19

### 20 21 22 23 **Conclusion**

24  
25  
26 We have presented population based data for the span of 11 years covering the entire  
27  
28  
29 Kyoto prefecture in Japan. Among stroke major subtypes, hazard ratio for death was  
30  
31  
32 highest in SAH, followed by CH and lowest in CI.  
33  
34  
35  
36  
37

### 38 **Acknowledgments**

39  
40 We acknowledge the contribution of participating institutions and their staffs who  
41  
42  
43 provided data in the Kyoto Stroke Registry.  
44  
45  
46  
47  
48

### 49 **Figure Legends**

50  
51  
52 Kaplan-Meier survival curves of stroke patients  
53  
54  
55  
56  
57  
58  
59  
60

## References

1. Turin TC, Kokubo Y, Murakami Y, et al. Lifetime risk of acute myocardial infarction in Japan. *Circulation. Cardiovascular quality and outcomes* 2010;**3**(6):701-3 doi: 10.1161/CIRCOUTCOMES.109.930776[published Online First: Epub Date]].
2. Scarborough P, Morgan RD, Webster P, et al. Differences in coronary heart disease, stroke and cancer mortality rates between England, Wales, Scotland and Northern Ireland: the role of diet and nutrition. *BMJ open* 2011;**1**(1):e000263 doi: 10.1136/bmjopen-2011-000263[published Online First: Epub Date]].
3. Lee S, Shafe AC, Cowie MR. UK stroke incidence, mortality and cardiovascular risk management 1999-2008: time-trend analysis from the General Practice Research Database. *BMJ open* 2011;**1**(2):e000269 doi: 10.1136/bmjopen-2011-000269[published Online First: Epub Date]].
4. Anderson GL, Whisnant JP. A comparison of trends in mortality from stroke in the United States and Rochester, Minnesota. *Stroke; a journal of cerebral circulation* 1982;**13**(6):804-9

- 1  
2  
3  
4  
5  
6 5. Shigematsu K, Shimamura O, Nakano H, et al. Vomiting should be a prompt  
7  
8 predictor of stroke outcome. *Emergency medicine journal* : EMJ 2012 doi:  
9  
10 10.1136/emmermed-2012-201586[published Online First: Epub Date]].  
11  
12  
13  
14 6. Hatano S. Experience from a multicentre stroke register: a preliminary report.  
15  
16 *Bulletin of the World Health Organization* 1976;**54**(5):541-53  
17  
18  
19  
20 7. International Classification of Diseases, Ninth Revision, Clinical Modification.  
21  
22 Washington, DC: US Department of Health and Human Service. 1988  
23  
24  
25  
26 8. Steindel SJ. International classification of diseases, 10th edition, clinical modification  
27  
28 and procedure coding system: descriptive overview of the next generation  
29  
30  
31  
32 HIPAA code sets. *Journal of the American Medical Informatics Association* :  
33  
34  
35 JAMIA 2010;**17**(3):274-82 doi: 10.1136/jamia.2009.001230[published Online  
36  
37 First: Epub Date]].  
38  
39  
40 9. Ohta T, Waga S, Handa W, et al. [New grading of level of disordered consciousness  
41  
42 (author's transl)]. *No shinkei geka. Neurological surgery* 1974;**2**(9):623-7  
43  
44  
45  
46 10. Ohta T, Kikuchi H, Hashi K, et al. Nizofenone administration in the acute stage  
47  
48 following subarachnoid hemorrhage. Results of a multi-center controlled  
49  
50 double-blind clinical study. *Journal of neurosurgery* 1986;**64**(3):420-6 doi:  
51  
52 10.3171/jns.1986.64.3.0420[published Online First: Epub Date]].  
53  
54  
55  
56  
57  
58  
59  
60

- 1  
2  
3  
4  
5  
6 11. Ueda K, Omae T, Hirota Y, et al. Decreasing trend in incidence and mortality from  
7  
8 stroke in Hisayama residents, Japan. Stroke; a journal of cerebral circulation  
9  
10 1981;**12**(2):154-60  
11  
12  
13  
14 12. Akita Stroke Registry. Secondary Akita Stroke Registry.  
15  
16 <http://www.msuisin.jp/blog/21nousochu.pdf>.  
17  
18  
19  
20 13. Suzuki K. Stroke recurrence. Treatment 2009;**9**:5-10  
21  
22  
23 14. Suzuki K. Epidemiology on recurrent stroke. Prevention of Atherosclerosis  
24  
25 2010;**91**:2560-4  
26  
27  
28 15. Iwate Cancer and Stroke Registry. Secondary Iwate Cancer and Stroke Registry.  
29  
30 [http://www.iwate.med.or.jp/gan\\_nou/index.html](http://www.iwate.med.or.jp/gan_nou/index.html).  
31  
32  
33  
34 16. Tochigi Stroke Registry. Secondary Tochigi Stroke Registry.  
35  
36 <http://www.pref.tochigi.lg.jp/e04/welfare/kenkoudukuri/kenkoudukuri/11732259>  
37  
38 [26699.html](http://www.pref.tochigi.lg.jp/e04/welfare/kenkoudukuri/kenkoudukuri/11732259).  
39  
40  
41  
42  
43 17. Welcome to the official homepage of Tochigi Prefecture, Japan. Secondary Welcome  
44  
45 to the official homepage of Tochigi Prefecture, Japan.  
46  
47 <http://www.pref.tochigi.lg.jp/english/foreignlanguage.html#english>.  
48  
49  
50  
51  
52 18. Miyazaki Stroke Registry. Secondary Miyazaki Stroke Registry 2010.  
53  
54 <http://www.msuisin.jp/blog/21nousochu.pdf>.  
55  
56  
57  
58  
59  
60

- 1  
2  
3  
4  
5  
6  
7  
8  
9  
10  
11  
12  
13  
14  
15  
16  
17  
18  
19  
20  
21  
22  
23  
24  
25  
26  
27  
28  
29  
30  
31  
32  
33  
34  
35  
36  
37  
38  
39  
40  
41  
42  
43  
44  
45  
46  
47  
48  
49  
50  
51  
52  
53  
54  
55  
56  
57  
58  
59  
60
19. Iwate Stroke Registry. Secondary Iwate Stroke Registry.  
<http://www.pref.iwate.jp/~hp1353/hoken/toukei/nousottyu/index.html>.
20. Turin TC, Kita Y, Murakami Y, et al. Higher stroke incidence in the spring season regardless of conventional risk factors: Takashima Stroke Registry, Japan, 1988-2001. *Stroke; a journal of cerebral circulation* 2008;**39**(3):745-52 doi: 10.1161/STROKEAHA.107.495929[published Online First: Epub Date].
21. Turin TC, Kita Y, Murakami Y, et al. Increase of stroke incidence after weekend regardless of traditional risk factors: Takashima Stroke Registry, Japan; 1988-2003. *Cerebrovascular diseases* 2007;**24**(4):328-37 doi: 10.1159/000106978[published Online First: Epub Date].
22. Kita Y, Turin TC, Rumana N, et al. Surveillance and measuring trends of stroke in Japan: the Takashima Stroke Registry (1988 - present). *International journal of stroke : official journal of the International Stroke Society* 2007;**2**(2):129-32 doi: 10.1111/j.1747-4949.2007.00107.x[published Online First: Epub Date].
23. Kubo M, Kiyohara Y, Kato I, et al. Trends in the incidence, mortality, and survival rate of cardiovascular disease in a Japanese community: the Hisayama study. *Stroke; a journal of cerebral circulation* 2003;**34**(10):2349-54 doi: 10.1161/01.STR.0000090348.52943.A2[published Online First: Epub Date].

- 1  
2  
3  
4  
5  
6 24. Kiyohara Y, Kubo M, Kato I, et al. Ten-year prognosis of stroke and risk factors for  
7  
8 death in a Japanese community: the Hisayama study. Stroke; a journal of  
9 cerebral circulation 2003;**34**(10):2343-7 doi:  
10 10.1161/01.STR.0000091845.14833.43[published Online First: Epub Date]].  
11  
12  
13  
14  
15  
16  
17 25. Hata J, Tanizaki Y, Kiyohara Y, et al. Ten year recurrence after first ever stroke in a  
18 Japanese community: the Hisayama study. Journal of neurology, neurosurgery,  
19 and psychiatry 2005;**76**(3):368-72 doi: 10.1136/jnnp.2004.038166[published  
20 Online First: Epub Date]].  
21  
22  
23  
24  
25  
26  
27  
28  
29 26. Department of Environmental Medicine GSoMS, Kyushu University. About a  
30 Hisayama study. Secondary About a Hisayama study.  
31  
32 <http://www.med.kyushu-u.ac.jp/envmed/about/index.html>.  
33  
34  
35  
36  
37  
38 27. Turin TC, Kita Y, Rumana N, et al. Ischemic stroke subtypes in a Japanese  
39 population: Takashima Stroke Registry, 1988-2004. Stroke; a journal of cerebral  
40 circulation 2010;**41**(9):1871-6 doi:  
41  
42 10.1161/STROKEAHA.110.581033[published Online First: Epub Date]].  
43  
44  
45  
46  
47  
48  
49 28. Tanaka H, Ueda Y, Hayashi M, et al. Risk factors for cerebral hemorrhage and  
50 cerebral infarction in a Japanese rural community. Stroke; a journal of cerebral  
51 circulation 1982;**13**(1):62-73  
52  
53  
54  
55  
56  
57  
58  
59  
60

- 1  
2  
3  
4  
5  
6 29. Hacke W, Schwab S, Horn M, et al. 'Malignant' middle cerebral artery territory  
7  
8 infarction: clinical course and prognostic signs. Archives of neurology  
9  
10  
11 1996;**53**(4):309-15  
12  
13  
14 30. Klatzo I. Brain oedema following brain ischaemia and the influence of therapy.  
15  
16  
17 British journal of anaesthesia 1985;**57**(1):18-22  
18  
19  
20 31. Collins R, Peto R, MacMahon S, et al. Blood pressure, stroke, and coronary heart  
21  
22  
23 disease. Part 2, Short-term reductions in blood pressure: overview of randomised  
24  
25  
26 drug trials in their epidemiological context. Lancet 1990;**335**(8693):827-38  
27  
28  
29 32. Wolf PA, Abbott RD, Kannel WB. Atrial fibrillation as an independent risk factor  
30  
31  
32 for stroke: the Framingham Study. Stroke; a journal of cerebral circulation  
33  
34  
35 1991;**22**(8):983-8  
36  
37  
38 33. Abbott RD, Donahue RP, MacMahon SW, et al. Diabetes and the risk of stroke. The  
39  
40  
41 Honolulu Heart Program. JAMA : the journal of the American Medical  
42  
43  
44 Association 1987;**257**(7):949-52  
45  
46  
47 34. Wolf PA, D'Agostino RB, Belanger AJ, et al. Probability of stroke: a risk profile  
48  
49  
50 from the Framingham Study. Stroke; a journal of cerebral circulation  
51  
52  
53 1991;**22**(3):312-8  
54  
55  
56  
57  
58  
59  
60

- 1  
2  
3  
4  
5  
6 35. Iso H, Jacobs DR, Jr., Wentworth D, et al. Serum cholesterol levels and six-year  
7  
8 mortality from stroke in 350,977 men screened for the multiple risk factor  
9  
10 intervention trial. *The New England journal of medicine* 1989;**320**(14):904-10  
11  
12 doi: 10.1056/NEJM198904063201405[published Online First: Epub Date]].  
13  
14  
15  
16  
17 36. Bazzano LA, Gu D, Reynolds K, et al. Alcohol consumption and risk for stroke  
18  
19 among Chinese men. *Annals of neurology* 2007;**62**(6):569-78 doi:  
20  
21 10.1002/ana.21194[published Online First: Epub Date]].  
22  
23  
24  
25  
26 37. Djousse L, Ellison RC, Beiser A, et al. Alcohol consumption and risk of ischemic  
27  
28 stroke: The Framingham Study. *Stroke; a journal of cerebral circulation*  
29  
30 2002;**33**(4):907-12  
31  
32  
33  
34 38. Balami JS, Chen RL, Grunwald IQ, et al. Neurological complications of acute  
35  
36 ischaemic stroke. *Lancet neurology* 2011;**10**(4):357-71 doi:  
37  
38 10.1016/S1474-4422(10)70313-6[published Online First: Epub Date]].  
39  
40  
41  
42  
43 39. Lavados PM, Sacks C, Prina L, et al. Incidence, 30-day case-fatality rate, and  
44  
45 prognosis of stroke in Iquique, Chile: a 2-year community-based prospective  
46  
47 study (PISCIS project). *Lancet* 2005;**365**(9478):2206-15 doi:  
48  
49 10.1016/S0140-6736(05)66779-7[published Online First: Epub Date]].  
50  
51  
52  
53  
54  
55  
56  
57  
58  
59  
60



1  
2  
3  
4  
5  
6  
7  
8  
9  
10  
11  
12  
13  
14  
15  
16  
17  
18  
19  
20  
21  
22  
23  
24  
25  
26  
27  
28  
29  
30  
31  
32  
33  
34  
35  
36  
37  
38  
39  
40  
41  
42  
43  
44  
45  
46  
47  
48  
49  
50  
51  
52  
53  
54  
55  
56  
57  
58  
59  
60

For peer review only

1  
2  
3  
4  
5  
6  
7  
8  
9  
10  
11  
12  
13  
14  
15  
16  
17  
18  
19  
20  
21  
22  
23  
24  
25  
26  
27  
28  
29  
30  
31  
32  
33  
34  
35  
36  
37  
38  
39  
40  
41  
42  
43  
44  
45  
46  
47  
48  
49  
50  
51  
52  
53  
54  
55  
56  
57  
58  
59  
60

Figure Kaplan-Meier Survival Curves of stroke patients



Kaplan-Meier survival curves of stroke patients  
215x156mm (300 x 300 DPI)

view only

## Supplementary Table 1A Summary of the Kyoto Stroke Registry Program

### 1. Purpose

The purpose of this registry is to register and analyze all stroke patients in Kyoto prefecture with cooperation of the affiliated medical institutions to better understand the facts about stroke patients and to identify effective countermeasures against stroke including prevention, rehabilitation, and home care.

### 2. Implementation body

Kyoto prefecture entrusts the program to the Kyoto Medical Association. The Kyoto Medical Association conducts the registry with cooperation of affiliated medical associations.

### 3. Registry Committee

The Committee of the Kyoto Medical Association Stroke Registry Program supervises and advises the program for smooth conduction.

### 4. Subjects

The residents of Kyoto prefecture who consult medical institutions that belong to the Kyoto Medical Association are subjected to registration.

### 5. Methods

- (1) The Kyoto Medical Association distributes the stroke patients registration forms to the affiliated medical institutions
- (2) The medical institutions fill in and submit the registration forms when their patients apply to the following criteria.
  - 1 Patients diagnosed with stroke
  - 2 Patients diagnosed with stroke who were treated for stroke or had been treated for stroke and the treatment was discontinued in the past
  - 3 Patients who were once enrolled in the registry and had stroke again
  - 4 Patients whose diagnoses were confirmed as stroke after they were registered with suspected stroke
- (3) The Kyoto Medical Association computerizes the registration forms and registers, stores and analyzes patients information
- (4) The Kyoto Medical Association inquires the medical institutions if crucial information such as patients' address and their dates of birth is missing

1  
2  
3  
4  
5 (5) The Kyoto Medical Association informs the medical institutions results of its  
6 registry  
7

8  
9  
10 6. Death records

11 The registry is referred with death records  
12

13  
14 7. Follow-up study

15 Supplementary study and follow-up study are conducted by the Kyoto Medical  
16 Association with cooperation of attending physicians if needed  
17

18  
19  
20 8. Cooperation of related associations and organizations

21 This project is conducted with cooperation of medical institutions and related  
22 associations, organizations, research organizations and expert meetings.  
23

24  
25  
26 9. Privacy policy

27 Doctors and any other participants in this registry must protect patients' privacy  
28

29  
30 10. Contact with patients

31 Patients must not be contacted without any permission from attending physicians  
32  
33  
34  
35

36 **Supplementary Table 1B Inclusion and Exclusion criteria for KSR**

37  
38 [Inclusion criteria]

- 39  
40 1 Patients are registered when they have acute clinical symptoms arising from  
41 cerebrovascular disorders that last for more than 24 hours or lead to death.  
42  
43 2 Patients are registered regardless to their age.  
44  
45 3 Patients are registered regardless to their sex.  
46  
47 4 Patients must have lived in Kyoto Prefecture.  
48  
49 5 Conditions such as shock, Adam-Strokes Syndrome or hypertensive encephalopathy  
50 are excluded as they are not caused directly by cerebrovascular events.  
51  
52 6 TIA is also excluded as the symptoms cease within 24 hours after onset.  
53  
54 7 Differential diagnoses are made by attending physicians based on CT/MRI images  
55 and other clinical examinations.

56 [Exclusion criteria]  
57  
58  
59  
60

- 1 When patients are diagnosed with some other disorder than stroke
- 2 When patients move out of Kyoto prefecture
- 3 When patients have symptomatic stroke (stroke-like symptoms but caused by non cerebrovascular origins)
  - Caused by head trauma
  - Developed during pregnancy, parturition and puerperal periods
  - Caused by drugs and toxins
  - Caused by cancer
  - Caused by hematologic disease
  - Caused by encephalitis or meningitis

## Supplementary Table 2

Supplementary Table 2-A. Age and Sex Distribution of Strokes in Kyoto Stroke Registry

Supplementary Table 2-B. Population by Sex and Age, Kyoto Prefecture, Japan

Supplementary Table 2-C. Annual Monitoring Rates of Subtypes in Stroke per 10,000 Populations in Kyoto Prefecture

Supplementary Table 2-D. Age and Sex Distribution of Strokes in Tochigi Stroke Registry

Supplementary Table 2-E Population by Sex and Age, Tochigi Prefecture, Japan

Supplementary Table 2-F. Annual Monitoring Rates of Subtypes in Stroke per 10,000 Populations in Tochigi Prefecture

Supplementary Table 2-G. Age and Sex Distribution of Strokes in Miyazaki Stroke Registry

Supplementary Table 2-H. Population by Sex and Age, Miyazaki Prefecture, Japan

Supplementary Table 2-I. Annual Monitoring Rates of Subtypes in Stroke per 10,000 Populations in Miyazaki Prefecture

Supplementary Table 2-A. Age and Sex Distribution of Strokes in the Kyoto Stroke Registry

| Age group | Cerebral infarction |       |       | Cerebral hemorrhage |       |       | Subarachnoid hemorrhage |       |       |
|-----------|---------------------|-------|-------|---------------------|-------|-------|-------------------------|-------|-------|
|           | Men                 | Women | Total | Men                 | Women | Total | Men                     | Women | Total |
| <20       | 5                   | 2     | 7     | 7                   | 3     | 10    | 0                       | 0     | 0     |
| 20-29     | 10                  | 4     | 14    | 13                  | 7     | 20    | 4                       | 4     | 8     |
| 30-39     | 40                  | 22    | 62    | 24                  | 27    | 51    | 20                      | 17    | 37    |
| 40-49     | 122                 | 66    | 188   | 105                 | 59    | 164   | 72                      | 76    | 148   |
| 50-59     | 608                 | 204   | 812   | 374                 | 220   | 594   | 138                     | 180   | 318   |
| 60-69     | 1,516               | 539   | 2,055 | 622                 | 293   | 915   | 116                     | 194   | 310   |
| 70-79     | 1,706               | 1,131 | 2,937 | 498                 | 449   | 947   | 53                      | 174   | 227   |
| 80-89     | 927                 | 1,417 | 2,344 | 219                 | 450   | 669   | 21                      | 105   | 126   |
| >90       | 160                 | 1417  | 2344  | 57                  | 122   | 179   | 0                       | 23    | 23    |

Supplementary Table 2-B. Population by Sex and Age, Kyoto Prefecture, Japan (2010)

| Age group |
|-----------|
|-----------|

|              | 20-29   | 30-39   | 40-49   | 50-59   | 60-69   | 70-79   | 80-89  | >90    |
|--------------|---------|---------|---------|---------|---------|---------|--------|--------|
| <b>Men</b>   | 153,750 | 180,802 | 161,356 | 147,768 | 186,956 | 119,094 | 48,383 | 6,030  |
| <b>Women</b> | 152,528 | 184,729 | 167,751 | 158,029 | 206,016 | 144,563 | 87,673 | 23,313 |

Supplementary Table 2-C. Annual Monitoring Rates of Subtype in Stroke per 10,000 populations in Kyoto Stroke Registry

| Sub<br>-type | Sex   | Age group |       |       |       |       |       |       |       |
|--------------|-------|-----------|-------|-------|-------|-------|-------|-------|-------|
|              |       | 20-29     | 30-39 | 40-49 | 50-59 | 60-69 | 70-79 | 80-89 | >90   |
| <b>CI</b>    | Men   | 0.06      | 0.20  | 0.69  | 3.74  | 7.37  | 13.02 | 17.43 | 24.12 |
|              | Women | 0.02      | 0.11  | 0.36  | 1.17  | 3.10  | 7.11  | 14.69 | 55.26 |
| <b>CH</b>    | Men   | 0.08      | 0.12  | 0.59  | 2.30  | 3.03  | 3.801 | 4.12  | 8.59  |
|              | Women | 0.04      | 0.13  | 0.32  | 1.27  | 1.29  | 2.824 | 4.67  | 4.76  |
| <b>SAH</b>   | Men   | 0.02      | 0.10  | 0.41  | 0.85  | 0.56  | 0.41  | 0.40  | 0.00  |
|              | Women | 0.02      | 0.08  | 0.41  | 1.04  | 0.86  | 1.09  | 1.09  | 0.90  |

Supplementary Table 2-D. Age and Sex Distribution of Strokes in Tochigi Stroke Registry

| Age<br>group  | Cerebral infarction |       |       | Cerebral<br>hemorrhage |       |       | Subarachnoid<br>hemorrhage |       |       |
|---------------|---------------------|-------|-------|------------------------|-------|-------|----------------------------|-------|-------|
|               | Men                 | Women | Total | Men                    | Women | Total | Men                        | Women | Total |
| <b>-39</b>    | 15                  | 4     | 19    | 13                     | 2     | 15    | 5                          | 7     | 12    |
| <b>40-49</b>  | 42                  | 10    | 52    | 33                     | 7     | 40    | 10                         | 14    | 24    |
| <b>50-59</b>  | 118                 | 30    | 148   | 78                     | 42    | 120   | 13                         | 22    | 33    |
| <b>60-69</b>  | 300                 | 83    | 383   | 110                    | 56    | 166   | 23                         | 43    | 66    |
| <b>70-79</b>  | 334                 | 199   | 533   | 89                     | 77    | 166   | 5                          | 36    | 41    |
| <b>80-89</b>  | 262                 | 322   | 584   | 59                     | 85    | 144   | 7                          | 32    | 39    |
| <b>&gt;90</b> | 34                  | 103   | 137   | 4                      | 9     | 13    | 0                          | 4     | 4     |

Supplementary Table 2-E. Population by Sex and Age, Tochigi Prefecture, Japan (2010)

|              | Age group |         |         |         |         |        |        |
|--------------|-----------|---------|---------|---------|---------|--------|--------|
|              | -39       | 40-49   | 50-59   | 60-69   | 70-79   | 80-89  | >90    |
| <b>Men</b>   | 493,600   | 128,100 | 147,400 | 141,000 | 84,700  | 38,500 | 4,000  |
| <b>Women</b> | 447,100   | 120,200 | 141,200 | 139,400 | 105,200 | 74,700 | 17,500 |

Supplementary Table 2-F. Annual Monitoring Rates of Subtype in Stroke per 10,000

## Populations in Tochigi Stroke Registry

| Sub<br>-type | Sex   | Age group |       |       |       |       |       |       |
|--------------|-------|-----------|-------|-------|-------|-------|-------|-------|
|              |       | -39       | 40-49 | 50-59 | 60-69 | 70-79 | 80-89 | >90   |
| CI           | Men   | 0.30      | 3.28  | 8.01  | 21.28 | 39.43 | 68.05 | 80.00 |
|              | Women | 0.09      | 0.83  | 2.13  | 5.95  | 18.92 | 43.11 | 58.86 |
| CH           | Men   | 0.26      | 2.58  | 5.29  | 7.80  | 10.51 | 15.36 | 10.00 |
|              | Women | 0.04      | 0.08  | 2.98  | 4.02  | 7.32  | 11.38 | 5.14  |
| SAH          | Men   | 0.10      | 0.78  | 0.88  | 1.63  | 0.59  | 1.82  | 0.00  |
|              | Women | 0.16      | 1.16  | 1.56  | 3.08  | 3.42  | 4.28  | 2.29  |

## Supplementary Table 2-G. Age and Sex Distribution of Strokes in Miyazaki Stroke Registry

| Age<br>group | Cerebral infarction |       |       | Cerebral<br>hemorrhage |       |       | Subarachnoid<br>hemorrhage |       |       |
|--------------|---------------------|-------|-------|------------------------|-------|-------|----------------------------|-------|-------|
|              | Men                 | Women | Total | Men                    | Women | Total | Men                        | Women | Total |
| <20          | 0                   | 0     | 0     | 0                      | 1     | 1     | 0                          | 0     | 0     |
| 20-29        | 0                   | 0     | 0     | 0                      | 0     | 0     | 1                          | 0     | 1     |
| 30-39        | 2                   | 3     | 5     | 5                      | 2     | 7     | 4                          | 0     | 4     |
| 40-49        | 11                  | 7     | 18    | 13                     | 10    | 23    | 5                          | 4     | 9     |
| 50-59        | 60                  | 21    | 81    | 49                     | 15    | 64    | 3                          | 8     | 11    |
| 60-69        | 97                  | 64    | 161   | 78                     | 33    | 111   | 7                          | 20    | 27    |
| 70-79        | 222                 | 144   | 366   | 73                     | 69    | 142   | 3                          | 33    | 36    |
| 80-89        | 150                 | 177   | 327   | 39                     | 66    | 105   | 3                          | 20    | 23    |
| >90          | 23                  | 60    | 83    | 11                     | 14    | 25    | 0                          | 3     | 3     |

## Supplementary Table 2-H. Population by Sex and Age, Miyazaki Prefecture, Japan (2010)

|       | Age group |        |        |        |        |        |        |       |
|-------|-----------|--------|--------|--------|--------|--------|--------|-------|
|       | 20-29     | 30-39  | 40-49  | 50-59  | 60-69  | 70-79  | 80-89  | >90   |
| Men   | 19,314    | 26,526 | 23,726 | 26,037 | 25,650 | 16,164 | 7,337  | 982   |
| Women | 22,034    | 28,537 | 26,656 | 28,889 | 28,656 | 20,935 | 13,219 | 3,544 |

## Supplementary Table 2-I. Annual Monitoring Rates of Subtype in Stroke per 10,000 Populations in Miyazaki Stroke Registry

| Sub | Age group |  |  |  |  |  |  |  |
|-----|-----------|--|--|--|--|--|--|--|
|-----|-----------|--|--|--|--|--|--|--|



| <b>-type</b> | Sex   | 20-29 | 30-39 | 40-49 | 50-59 | 60-69 | 70-79  | 80-89  | >90    |
|--------------|-------|-------|-------|-------|-------|-------|--------|--------|--------|
| <b>CI</b>    | Men   | 0.00  | 0.75  | 4.64  | 23.04 | 37.82 | 137.34 | 204.44 | 234.22 |
|              | Women | 0.00  | 1.05  | 2.63  | 7.27  | 22.33 | 68.78  | 133.90 | 169.30 |
| <b>CH</b>    | Men   | 0.00  | 1.88  | 5.48  | 18.82 | 30.41 | 45.16  | 53.16  | 112.02 |
|              | Women | 0.00  | 0.75  | 3.75  | 5.19  | 11.52 | 32.96  | 49.93  | 39.50  |
| <b>SAH</b>   | Men   | 0.52  | 1.51  | 2.11  | 1.15  | 2.73  | 1.86   | 1.36   | 0.00   |
|              | Women | 0.00  | 0.00  | 1.50  | 2.77  | 6.98  | 15.76  | 15.13  | 8.47   |

Supplementary Table 3 Characteristics of stroke patients in Group-A and in Group-B

| <b>Group-A</b>                                                        | <b>Overall<br/>n=7,886</b> | <b>Cerebral<br/>infarction n=<br/>5,247(66.6%)</b> | <b>Cerebral<br/>hemorrhage<br/>n=1,896<br/>(24.1%)</b> | <b>Subarachnoid<br/>hemorrhage<br/>n=711 (9.0%)</b> |
|-----------------------------------------------------------------------|----------------------------|----------------------------------------------------|--------------------------------------------------------|-----------------------------------------------------|
| <b>Age (mean± SD)</b>                                                 | 70.5±12.7                  | 72.5±11.6                                          | 68.5±13.3                                              | 61.2±13.5                                           |
| <b>Sex, % female<br/>(n=female:<br/>male)</b>                         | 44.8<br>(3,531:4,349)      | 41.9<br>(2,196:3,051)                              | 46.1<br>(875:1,021)                                    | 62.9 (447:264)                                      |
| <b>Systolic blood<br/>pressure (mean±<br/>SD), mmHg</b>               | 161.5±31.6                 | 158.1±28.5                                         | 172.4±35.1                                             | 157.2±36.7                                          |
| <b>Diastolic blood<br/>pressure (mean±<br/>SD), mmHg</b>              | 87.3±18.7                  | 85.8±17.2                                          | 92.4±20.6                                              | 85.4±21.8                                           |
| <b>Hypertension<br/>history, %<br/>(n=with:<br/>without)</b>          | 60.2<br>(4379:2,900)       | 59.2<br>(2,922:2,016)                              | 67.3<br>(1,148:557)                                    | 48.3 (296:317)                                      |
| <b>Arrhythmia,<br/>(n=with:<br/>without)</b>                          | 14.9<br>(1,132:6,446)      | 19.4<br>(988:4,110)                                | 5.4 (97:1,694)                                         | 6.9 (46:617)                                        |
| <b>Arrhythmia<br/>history, %<br/>(n=with:<br/>without)</b>            | 19.0 (74.7)                | 25.1<br>(1,243:3,704)                              | 6.3<br>(107:1,580)                                     | 5.3 (32:576)                                        |
| <b>Diabetes<br/>mellitus<br/>history, %<br/>(n=with:<br/>without)</b> | 20.5<br>(1,500:5,827)      | 24.2<br>(1,209:3,796)                              | 14.5<br>(245:1,447)                                    | 6.8 (41:565)                                        |
| <b>Hyperlipemia<br/>history, %<br/>(n=with:<br/>without)</b>          | 17.5<br>(1,250:5,910)      | 21.0<br>(1,028:3,869)                              | 10.7<br>(177:1,472)                                    | 7.1 (42:547)                                        |
| <b>Tobacco use, %</b>                                                 | 33.6                       | 33.6                                               | 30.6                                                   | 40.0 (218:327)                                      |

|                                                                   |                         |                       |                     |                |
|-------------------------------------------------------------------|-------------------------|-----------------------|---------------------|----------------|
| <b>(n=with:<br/>without)</b>                                      | (2,152:4,259)           | (1,482:2,925)         | (441:998)           |                |
| <b>Non smoker, %<br/>(n)</b>                                      | 60.5 (3,797)            | 66.4 (2,925)          | 69.4 (998)          | 60.0 (327)     |
| <b>Former<br/>smoker, % (n)</b>                                   | 4.4 (281)               | 4.6 (202)             | 4.9 (70)            | 1.7 (9)        |
| <b>Light<br/>smoker, % (n)</b>                                    | 17.7 (1,132)            | 17.7 (782)            | 15.0 (216)          | 23.5 (128)     |
| <b>Heavy<br/>smoker, % (n)</b>                                    | 11.5 (739)              | 11.3 (498)            | 10.8 (155)          | 14.9 (81)      |
| <b>Alcohol use, %<br/>(n=with:<br/>without)</b>                   | 39.5<br>(2,478:3,797)   | 37.8<br>(1,624:2,669) | 41.3<br>(585:832)   | 47.5 (258)     |
| <b>Non drinker, %<br/>(n)</b>                                     | 60.5 (3,797)            | 62.2 (2,669)          | 58.7 (832)          | 52.5 (285)     |
| <b>Occasional<br/>drinker, % (n)</b>                              | 17.6 (1,105)            | 17.6 (754)            | 15.8 (224)          | 22.1 (120)     |
| <b>Every day<br/>drinker, % (n)</b>                               | 21.9 (1,373)            | 20.3 (870)            | 25.5 (361)          | 25.4 (138)     |
| <b>Paresis,<br/>(n=with:<br/>without)</b>                         | % 73.7<br>(5,581:1,987) | 78.0<br>(3,996:1,129) | 78.8<br>(1,417:382) | 24.4 (151:467) |
| <b>Consciousness<br/>disturbance, %<br/>(n=with:<br/>without)</b> | 42.4<br>(3,290:4,463)   | 31.7<br>(1,634:3,518) | 64.9<br>(1,213:657) | 60.4 (426:279) |
| <b>JCS 0, % (n)</b>                                               | 58.6 (4,463)            | 69.3 (3,518)          | 35.7 (657)          | 40.8 (279)     |
| <b>JSC 1-digit<br/>code, % (n)</b>                                | 18.5 (1,409)            | 16.5 (837)            | 25.5 (468)          | 14.5 (99)      |
| <b>JSC 2-digit<br/>code, % (n)</b>                                | 11.8 (896)              | 9.1 (462)             | 17.8 (327)          | 14.8 (101)     |
| <b>JSC 3-digit<br/>code, % (n)</b>                                | 11.2 (853)              | 5.1 (257)             | 21.0 (386)          | 30.0 (205)     |
| <b>Delay time<br/>(mean± SD)</b>                                  | 4.15±5.03               | 4.55±5.42             | 3.48±4.12           | 3.40±4.23      |
| <b>CT, % (n)</b>                                                  | 92.4 (7,285)            | 89.4 (4,969)          | 98.0 (1,860)        | 98.9 (704)     |

|                                     |                 |                 |                  |                |
|-------------------------------------|-----------------|-----------------|------------------|----------------|
| <b>MRI, % (n)</b>                   | 59.4 (4,682)    | 74.4 (3,907)    | 33.7 (639)       | 17.6 (125)     |
| <b>Surgery</b>                      | % 17.6          | 4.8             | 69.1             | 77.1 (529:157) |
| <b>(n=with: without)</b>            | (1,356:6,339)   | (244:4,885)     | (573:1,282)      |                |
| <b>Mortality, % (n=dead: alive)</b> | 9.5 (745:7,097) | 5.0 (262:4,965) | 15.5 (292:1,592) | 26.9 (190:516) |

When the numbers entered in the table above are significantly different between different types of strokes, they are marked as follows:

\*1: significant difference between cerebral infarction and cerebral hemorrhage;

\*2: sig. difference between cerebral hemorrhage and subarachnoid hemorrhage;

\*3: sig. difference between subarachnoid hemorrhage and cerebral infarction;

SD = Standard Deviation

Supplementary Table 3: *continue*

| <b>Group B</b>                                               | <b>Overall<br/>n=5907</b> | <b>Cerebral<br/>Infarction<br/>n= 3,764(%)</b> | <b>Cerebral<br/>Hemorrhage<br/>n=1,653 (%)</b> | <b>Subarachnoi<br/>d<br/>Hemorrhage<br/>n=486 (%)</b> |
|--------------------------------------------------------------|---------------------------|------------------------------------------------|------------------------------------------------|-------------------------------------------------------|
| <b>Age (mean± SD)</b>                                        | 72.3±13.0                 | 74.4±12.0                                      | 69.8±13.9                                      | 64.9±13.3                                             |
| <b>Sex, % female<br/>(n=female:<br/>male)</b>                | 45.7<br>(2,702:3,206)     | 43.0<br>(1,619:2,145)                          | 45.7<br>(755:898)                              | 67.1<br>(326:160)                                     |
| <b>Systolic blood<br/>pressure (mean±<br/>SD), mmHg</b>      | 161±31.5                  | 156.6±28.0                                     | 171.9±34.5                                     | 159.0±37.4                                            |
| <b>Diastolic blood<br/>pressure (mean±<br/>SD), mmHg</b>     | 88.0±19.0                 | 85.3±16.7                                      | 93.9±21.6                                      | 88.9±21.6                                             |
| <b>Hypertension<br/>history, %<br/>(n=with:<br/>without)</b> | 65.9<br>(3,626:1,880)     | 65.8<br>(2,363:1,226)                          | 69.7<br>(1,035:449)                            | 52.2<br>(224:205)                                     |
| <b>Arrhythmia, %<br/>(n=with:<br/>without)</b>               | 14.0 (800:4,906)          | 18.2<br>(659:2,954)                            | 6.4<br>(103:1,515)                             | 7.6 (36:435)                                          |
| <b>Arrhythmia</b>                                            | 17.7 (974:4,531)          | 23.0                                           | 8.7                                            | 5.3 (23:409)                                          |

|                       |               |               |               |             |               |
|-----------------------|---------------|---------------|---------------|-------------|---------------|
| <b>history,</b>       | <b>%</b>      |               | (817:2,728)   | (133:1,391) |               |
| <b>(n=with:</b>       |               |               |               |             |               |
| <b>without)</b>       |               |               |               |             |               |
| <b>Diabetes</b>       | 21.4          |               | 25.7          | 15.1        | 7.0 (30:398)  |
| <b>mellitus</b>       | (1,189:4,371) |               | (929:2,679)   | (229:1,291) |               |
| <b>history,</b>       | <b>%</b>      |               |               |             |               |
| <b>(n=with:</b>       |               |               |               |             |               |
| <b>without)</b>       |               |               |               |             |               |
| <b>Hyperlipemia</b>   | 21.4          |               | 26.0          | 13.1        | 12.1 (51:371) |
| <b>history,</b>       | <b>%</b>      | (1,169:4,288) | (923:2,631)   | (194:1,283) |               |
| <b>(n=with:</b>       |               |               |               |             |               |
| <b>without)</b>       |               |               |               |             |               |
| <b>Tobacco use,</b>   | <b>%</b>      | 30.9          | 31.1          | 29.6        | 33.3          |
| <b>(n=with:</b>       |               | (1,513:3,383) | (973:2,152)   | (402:958)   | (136:272)     |
| <b>without)</b>       |               |               |               |             |               |
| <b>Non smoker,</b>    | <b>%</b>      | 69.1 (3,383)  | 68.9 (2,152)  | 70.4 (958)  | 66.7 (272)    |
| <b>(n)</b>            |               |               |               |             |               |
| <b>Former</b>         |               | 6.8 (334)     | 7.5 (233)     | 6.5 (89)    | 2.7 (11)      |
| <b>smoker, % (n)</b>  |               |               |               |             |               |
| <b>Light</b>          |               | 16.1 (786)    | 16.0 (499)    | 14.2 (193)  | 23.0 (94)     |
| <b>smoker, % (n)</b>  |               |               |               |             |               |
| <b>Heavy</b>          |               | 8.0 (393)     | 7.7 (241)     | 8.8 (120)   | 7.6 (31)      |
| <b>smoker, % (n)</b>  |               |               |               |             |               |
| <b>Alcohol use,</b>   | <b>%</b>      | 36.1          | 34.2          | 39.7        | 38.3          |
| <b>(n=with:</b>       |               | (1,722:3,051) | (1,030:1,986) | (539:818)   | (154:248)     |
| <b>without)</b>       |               |               |               |             |               |
| <b>Non drinker,</b>   | <b>%</b>      | 63.9 (3,054)  | 65.8 (1,986)  | 60.3 (818)  | 61.7 (248)    |
| <b>(n)</b>            |               |               |               |             |               |
| <b>Occasional</b>     |               | 12.3 (587)    | 12.5 (377)    | 11.1 (150)  | 14.7 (59)     |
| <b>drinker, % (n)</b> |               |               |               |             |               |
| <b>Every day</b>      |               | 23.8 (1,137)  | 21.7 (653)    | 28.7 (389)  | 23.6 (95)     |
| <b>drinker, % (n)</b> |               |               |               |             |               |
| <b>Paresis,</b>       | <b>%</b>      | 72.7          | 75.1          | 78.3        | 30.4          |
| <b>(n=with:</b>       |               | (4,087:1,534) | (2,754:912)   | (1,207:335) | (126:289)     |
| <b>without)</b>       |               |               |               |             |               |
| <b>Consciousness</b>  |               | 45.0          | 31.8          | 66.7        | 72.0          |

|                                      |                  |                 |                  |                |
|--------------------------------------|------------------|-----------------|------------------|----------------|
| <b>disturbance, %</b>                | (2,624:3,207)    | (1,181:2,530)   | (1,092:544)      | (349:136)      |
| <b>(n=with:<br/>without)</b>         |                  |                 |                  |                |
| <b>JCS 0, % (n)</b>                  | 55.5 (3,213)     | 68.8 (2,530)    | 33.5 (544)       | 28.3 (136)     |
| <b>JSC 1-digit code, % (n)</b>       | 20.9 (1,210)     | 18.2 (671)      | 27.9 (453)       | 17.9 (86)      |
| <b>JSC 2-digit code, % (n)</b>       | 12.2 (706)       | 8.5 (312)       | 18.2 (295)       | 20.6 (99)      |
| <b>JSC 3-digit code, % (n)</b>       | 11.3 (656)       | 4.5 (164)       | 20.3 (330)       | 33.3 (481)     |
| <b>Delay time (mean± SD)</b>         | 3.60±4.54        | 3.76±4.88       | 3.52±4.13        | 2.75±2.99      |
| <b>CT, % (n)</b>                     | 86.1 (5,080)     | 79.0 (2,972)    | 98.4 (1,625)     | 98.8 (479)     |
| <b>MRI, % (n)</b>                    | 71.3 (4,209)     | 86.2 (3,241)    | 47.8 (790)       | 36.1 (175)     |
| <b>Surgery (n=with:<br/>without)</b> | 13.9 (815:5,060) | 3.5 (130:3,610) | 20.8 (342:1,306) | 71.0 (342:140) |
| <b>Mortality, % (n=dead: alive)</b>  | 10.2 (599:5,294) | 5.5 (205:3,549) | 14.8 (244/1,405) | 30.5 (148:337) |

When the numbers entered in the table above are significantly different between different types of strokes, they are marked as follows:

\*1: significant difference between cerebral infarction and cerebral hemorrhage;

\*2: sig. difference between cerebral hemorrhage and subarachnoid hemorrhage;

\*3: sig. difference between subarachnoid hemorrhage and cerebral infarction;

SD = Standard Deviation

**Supplementary Table 4 A****Hazard Ratios for death in Group A, comparing stroke subtypes**

|                         | Hazard Ratio | 95% Confidence Interval |       | P      |
|-------------------------|--------------|-------------------------|-------|--------|
|                         |              | Lower                   | Upper |        |
| Cerebral infarction     | Reference    |                         |       |        |
| Cerebral hemorrhage     | 4.48         | 3.46                    | 5.79  | <0.001 |
| Subarachnoid hemorrhage | 9.39         | 6.88                    | 12.82 | <0.001 |

Adjusted for age, sex, histories of hypertension, arrhythmia, diabetes mellitus and hyperlipemia, and uses of tobacco and alcohol

**Supplementary Table 4 B****Hazard Ratios for death in Group B, comparing stroke subtypes**

|                         | HR        | 95% Confidence Interval |       | P      |
|-------------------------|-----------|-------------------------|-------|--------|
|                         |           | Lower                   | Upper |        |
| Cerebral infarction     | Reference |                         |       |        |
| Cerebral hemorrhage     | 3.01      | 2.35                    | 3.85  | <0.001 |
| Subarachnoid hemorrhage | 8.36      | 6.16                    | 11.34 | <0.001 |

Adjusted for age, sex, histories of hypertension, arrhythmia, diabetes mellitus and hyperlipemia, and uses of tobacco and alcohol



## Characteristics, risk factors and mortality of stroke patients in Kyoto, Japan

|                                 |                                                                                                                                                                                                                                                                                                                                                                                                                                                                                                                                                                                                                                                                                                                                                                                    |
|---------------------------------|------------------------------------------------------------------------------------------------------------------------------------------------------------------------------------------------------------------------------------------------------------------------------------------------------------------------------------------------------------------------------------------------------------------------------------------------------------------------------------------------------------------------------------------------------------------------------------------------------------------------------------------------------------------------------------------------------------------------------------------------------------------------------------|
| Journal:                        | <i>BMJ Open</i>                                                                                                                                                                                                                                                                                                                                                                                                                                                                                                                                                                                                                                                                                                                                                                    |
| Manuscript ID:                  | bmjopen-2012-002181.R2                                                                                                                                                                                                                                                                                                                                                                                                                                                                                                                                                                                                                                                                                                                                                             |
| Article Type:                   | Research                                                                                                                                                                                                                                                                                                                                                                                                                                                                                                                                                                                                                                                                                                                                                                           |
| Date Submitted by the Author:   | 06-Feb-2013                                                                                                                                                                                                                                                                                                                                                                                                                                                                                                                                                                                                                                                                                                                                                                        |
| Complete List of Authors:       | Shigematsu, Kazuo; National Hospital Organization, Minami Kyoto Hospital, Neurology<br>Nakano, Hiromi; Kyoto Kidugawa Hospital, Neurosurgery<br>Watanabe, Yoshiyuki; Kyoto Prefectural University of Medicine, Graduate School of Medical Science, Epidemiology for Community Health and Medicine<br>Sekimoto, Tatsuyuki; Kyoto Prefectural Yosanoumi Hospital, Neurosurgery<br>Shimizu, Kouichiro; Kyoto Fushimi Shimizu Hospital, Neurosurgery<br>Nishizawa, Akihiko; The Nishizawa Clinic, Internal Medicine<br>Makino, Masahiro; Japanese Red Cross Kyoto Daini Hospital, Neurology<br>Okumura, Atsushi; Kyoto Jujo Rehabilitation Hospital, Neurosurgery<br>Bando, Kazuhiko; The Bando Clinic, Internal Medicine<br>Kitagawa, Yasushi; The Kitagawa Clinic, Internal Medicine |
| <b>Primary Subject Heading</b>: | Public health                                                                                                                                                                                                                                                                                                                                                                                                                                                                                                                                                                                                                                                                                                                                                                      |
| Secondary Subject Heading:      | Public health, Health informatics, Epidemiology                                                                                                                                                                                                                                                                                                                                                                                                                                                                                                                                                                                                                                                                                                                                    |
| Keywords:                       | PUBLIC HEALTH, EPIDEMIOLOGY, STROKE MEDICINE                                                                                                                                                                                                                                                                                                                                                                                                                                                                                                                                                                                                                                                                                                                                       |
|                                 |                                                                                                                                                                                                                                                                                                                                                                                                                                                                                                                                                                                                                                                                                                                                                                                    |

SCHOLARONE™  
Manuscripts



1  
2  
3  
4  
5  
6 Characteristics, risk factors and mortality of stroke patients in Kyoto, Japan  
7  
8  
9

10  
11 **Short title:** Characteristics, risk factors and mortality of Stroke  
12  
13

14  
15  
16  
17 Kazuo Shigematsu<sup>1</sup>, Hiromi Nakano<sup>2</sup>, Yoshiyuki Watanabe<sup>3</sup>, Tatsuyuki Sekimoto<sup>4</sup>,  
18 Kouichiro Shimizu<sup>5</sup>, Akihiko Nishizawa<sup>6</sup>, Masahiro Makino<sup>7</sup>, Atsushi Okumura<sup>8</sup>,  
19 Kazuhiko Bando<sup>9</sup>, Yasushi Kitagawa<sup>10</sup>  
20  
21  
22  
23  
24  
25  
26

27 From: <sup>1</sup>National Hospital Organization, Minami Kyoto Hospital, <sup>2</sup>Kyoto Kidugawa  
28 Hospital, <sup>3</sup>Kyoto Prefectural University of Medicine, <sup>4</sup>Kyoto Yosanoumi Hospital,  
29  
30  
31  
32  
33 <sup>5</sup>Kyoto Fushimi Shimizu Hospital, <sup>6</sup>The Nishizawa Clinic, <sup>7</sup>Japanese Red Cross Kyoto  
34 Daini Hospital, <sup>8</sup>Jujoyo Rehabilitation Hospital, <sup>9</sup>The Bando Clinic, <sup>10</sup>The Kitagawa  
35  
36  
37  
38  
39  
40  
41  
42  
43  
44  
45  
46  
47  
48  
49  
50  
51  
52  
53  
54  
55  
56  
57  
58  
59  
60

Correspondence to Kazuo Shigematsu, MD

Department of Neurology, the National Hospital Organization, Minami Kyoto Hospital

11 Nakaashihara, Jouyou-shi, Kyoto, Japan, 610-0113

Phone 81-774-52-0065, Fax 81-774-55-2765, E-mail neuron.k07@gmail.com

1  
2  
3  
4  
5  
6 **Keywords:** epidemiology, public health, stroke medicine  
7

8  
9 **Contributorship:** All authors contributed equally to this study  
10

11 **Funding:** none  
12

13 **Competing interests:** none  
14  
15  
16  
17  
18  
19  
20  
21  
22  
23  
24  
25  
26  
27  
28  
29  
30  
31  
32  
33  
34  
35  
36  
37  
38  
39  
40  
41  
42  
43  
44  
45  
46  
47  
48  
49  
50  
51  
52  
53  
54  
55  
56  
57  
58  
59  
60

## *Article Summary*

### **Article focus**

We examined the characteristics, risk factors and outcome of contemporary stroke patients based on the Kyoto Stroke Registry for recent 11 years. The study cohort has 12,774 cerebral infarction (CI), 9,232 cerebral hemorrhage (CH) and 2,540 subarachnoid hemorrhage (SAH) patients.

### **Key messages**

About two thirds of the patients have a history of hypertension, whereas only about one fifth have histories of arrhythmia, diabetes mellitus or hyperlipemia. The prevalence of risk factors was different among stroke subtypes.

Mortality within 30 days after the onset was 5.2% in CI, 15.2% in CH and 28.4% in SAH.

Hazard ratios for death adjusted for age, sex, histories of hypertension, arrhythmia, diabetes mellitus and hyperlipemia and use of tobacco and/or alcohol, showed a significant ( $P < 0.001$ ) difference among CI (as reference), CH (3.71; 3.11-4.43) and SAH (8.95; 7.21-11.11).

1  
2  
3  
4  
5  
6 **Strengths and limitations of this study**  
7  
8

9  
10 This study provided quantitative data on the fundamentals of contemporary stroke in a  
11  
12 very large cohort in Kyoto Prefecture, Japan.  
13

14  
15  
16 Detailed information on the size and localization of the stroke and on treatment and  
17  
18 complications was not available in this population based study.  
19  
20  
21  
22  
23  
24  
25  
26  
27  
28  
29  
30  
31  
32  
33  
34  
35  
36  
37  
38  
39  
40  
41  
42  
43  
44  
45  
46  
47  
48  
49  
50  
51  
52  
53  
54  
55  
56  
57  
58  
59  
60

1  
2  
3  
4  
5  
6 **Objectives:** The aim of the study was to evaluate characteristics, risk factors and  
7  
8  
9 outcome of recent stroke patients in Kyoto Japan.  
10

11  
12 **Design:** We analyzed stroke patients in the registry with regard to their characteristics,  
13  
14 risk factors and mortality. The Cox proportional hazards regression was used to  
15  
16 calculate adjusted hazard ratios for death.  
17  
18  
19

20  
21  
22 **Settings:** The Kyoto prefecture of Japan has established a registry to enroll new stroke  
23  
24 patients in cooperation with the Kyoto Medical Association and its affiliated hospitals  
25  
26  
27  
28

29  
30  
31  
32 **Participants:** The registry now has data on 14,268 patients enrolled from January 1,  
33  
34 1999 to December 31, 2009. Of these, 12,774 (89.5%) underwent CT, 9,232 (64.7%)  
35  
36 MRI, 2,504 (17.5%) angiography, and 342 (2.4%) scintigraphy. Excluding 480 (3.3%)  
37  
38 unclassified patients, 13,788 (96.6%) patients formed the basis of further analyses  
39  
40  
41 divided then into three subtypes: cerebral infarction (CI), cerebral hemorrhage (CH),  
42  
43  
44 and subarachnoid hemorrhage (SAH).  
45  
46  
47  
48  
49

50  
51  
52 **Results:** A total of 13,788 confirmed stroke patients in the study cohort comprised  
53  
54 9,011 (86.3%) CI, 3,549 (25.7%) CH and 1,197 (8.7%) SAH cases. The mean age  $\pm$   
55  
56  
57  
58

1  
2  
3  
4  
5  
6 SD was  $73.3 \pm 11.8$ ,  $69.1 \pm 13.6$  and  $62.7 \pm 13.5$  in the CI, CH and SAH cases,  
7  
8  
9 respectively. Males were predominant in the CI and CH cases, whereas females were  
10  
11 predominant in the SAH cases. The frequencies of risk factors were different among the  
12  
13 subtypes. Mortality was worst in SAH, followed by CH, and least in CI. Hazard ratios  
14  
15 for death adjusted for age, sex, histories of hypertension, arrhythmia, diabetes mellitus  
16  
17 and hyperlipemia and use of tobacco and/or alcohol, showed a significant ( $P < 0.001$ )  
18  
19 difference among CI (as reference), CH (3.71; 3.11-4.43) and SAH (8.94; 7.21-11.11).  
20  
21  
22  
23  
24  
25  
26  
27  
28  
29

30 **Conclusions:** The characteristics, risk factors, and mortality were evaluated in a  
31  
32 quantitative manner in a large Japanese study cohort to shed light on the present status  
33  
34 of stroke medicine.  
35  
36  
37  
38  
39  
40  
41  
42  
43  
44  
45  
46  
47  
48  
49  
50  
51  
52  
53  
54  
55  
56  
57  
58  
59  
60

## Introduction

Stroke, the third major cause of death, is the largest cause of acquired disability in Japan [1]. According to a report of the Ministry of Health, Labor and Welfare, about 123,400 people died from stroke in 2010. About 10.3% of all national deaths resulted from stroke. Stroke is regarded as one of the diseases developed by long lasting exposure to risk factors associated with lifestyle. The incidence, as well as mortality, should be greatly affected by society, regions and times [2 3]. Updated detailed information on stroke events is required. A long-term surveillance of stroke, comparing characteristics, risk factors and mortality, based on the entire population in a prefecture as large as Kyoto, which has about 2,630,000 residents, should provide a fundamental database for stroke. Stroke consists of three major distinct subtypes: namely, cerebral infarction (CI), cerebral hemorrhage (CH), and subarachnoid hemorrhage (SAH). Although these subtypes have many things in common, distinct characteristics prevail. Quantitative measurement of these differences in the same large cohort should help characterize the three stroke subtypes [4]. The strength of comparing these three stroke subtypes in the same large cohort is that, by doing so, we can evaluate the relative

1  
2  
3  
4  
5  
6 influence of the risk factors on each subtype. These data may also help to elucidate  
7  
8  
9 hazard ratios for death among major stroke subtypes.  
10

11  
12  
13  
14  
15  
16 The Kyoto prefecture of Japan has established a registry to enroll all new  
17  
18 stroke patients in cooperation with the Kyoto Medical Association and its affiliated  
19  
20 hospitals, with help from the data collecting agency known as the Kyoto Stroke Registry  
21  
22 (KSR) [5]. We studied all patients registered during the past 11 years in the prefecture of  
23  
24  
25  
26  
27 Kyoto to document characteristics, risk factors, and hazard ratios in the three major  
28  
29  
30 stroke subtypes.  
31  
32  
33  
34  
35

### 36 **Methods**

37  
38  
39  
40  
41  
42 We analyzed all stroke patients identified from January 1999 to December  
43  
44 2009 in the entire Kyoto prefecture and registered in the KSR run by the local  
45  
46 government of Kyoto prefecture. The Kyoto Medical Association distributed the  
47  
48 registration forms to the affiliated medical institutions and collected the data. A total of  
49  
50  
51  
52  
53  
54 151 hospitals have registered patients.  
55  
56  
57  
58  
59  
60



1  
2  
3  
4  
5  
6 We supply a summary of the KSR Program in supplementary Table 1 A. This summary  
7  
8  
9 has been distributed to all hospitals affiliated with the Kyoto Medical Association and to  
10  
11  
12 public health centers in the Kyoto Prefecture. It is also attached to the annual reports  
13  
14  
15 published by the Kyoto Prefecture.  
16  
17  
18  
19

20  
21 The diagnosis of stroke was confirmed by local neurologists and/or neurosurgeons  
22  
23 based on the WHO definition [6]. Stroke patients who lived in the Kyoto prefecture  
24  
25 were registered regardless of their age and sex. Conditions such as shock, Adam-Strokes  
26  
27 syndrome or hypertensive encephalopathy are excluded, as they are not caused directly  
28  
29 by cerebrovascular events. Transient ischemic attack (TIA) is also excluded as the  
30  
31 symptoms cease within 24 hours after onset. Differential diagnoses were made by the  
32  
33 attending physicians, based on CT/MRI images and other clinical examinations.  
34  
35  
36  
37  
38  
39

40  
41 Inclusion and exclusion criteria for the KSR are shown in supplementary Table 1B.  
42  
43  
44  
45

46  
47 We classified the patients into CI (ICD-9 code 433 and 434, ICD-10 code I63), CH  
48  
49 (ICD-9 code 431, ICD-10 code I61), SAH (ICD-9 code 430, ICD-10 code I60) [7 8] and  
50  
51  
52 others by neurological examination and the findings of CT scans, MRI scans,  
53  
54  
55 angiographies, and scintigraphies. In order to clarify trends over time, we also divided  
56  
57  
58  
59  
60

1  
2  
3  
4  
5  
6 the study cohort into two groups, Group-A and Group-B, according to the date of onset  
7  
8  
9 of the event. Group-A comprises patients who developed strokes between January 1999  
10  
11 and June 2004, and Group-B comprises patients who developed strokes between July  
12  
13 2004 and December 2009. We showed differences between the two groups and, using  
14  
15 multivariate analyses, calculated hazard ratios for death comparing the two groups.  
16  
17  
18  
19

20  
21  
22  
23 Each registry recorded age, sex, date of stroke onset, blood pressure and arrhythmia on  
24  
25 arrival, history of hypertension, arrhythmia, diabetes mellitus and hyperlipemia, tobacco  
26  
27 and alcohol use, type of paresis, consciousness levels and clinical outcome 30 days after  
28  
29 the onset.  
30  
31  
32  
33

34  
35 For the purpose of this entry, we used the following definitions.  
36  
37

- 38 1) Systolic and diastolic hypertension: blood pressure is 140 and 90 mmHg or higher,  
39
- 40 2) Arrhythmia: any types of irregularity,  
41  
42
- 43 3) Diabetes mellitus: fasting plasma glucose is 126mg/dl or higher, and/or plasma  
44  
45 glucose 2 hours after 75g glucose load is 200 mg/dl or higher [9],  
46  
47  
48
- 49 4) Hyperlipemia: serum cholesterol level is 220 mg/dl or higher and/or triglyceride is  
50  
51  
52 150mg/dl or higher,  
53  
54  
55  
56  
57  
58  
59  
60

- 1  
2  
3  
4  
5  
6 5) Smoking was divided into four categories: non-smokers, and former smokers for  
7  
8 more than a year, light smokers with 20 or less cigarettes a day and heavy smokers  
9  
10 with more than 20 cigarettes a day,  
11  
12  
13  
14 6) Alcohol consumption was divided into three categories: non-drinkers, occasional  
15  
16 drinkers (less than three time a week), and daily drinkers (more than four times a  
17  
18 week),  
19  
20  
21  
22  
23 7) Paresis: any distribution, including unilateral or bilateral effect on limb or face,  
24  
25  
26 8) Consciousness levels based on the Japan Coma Scale (JCS) [10] [11], the most  
27  
28 widely used Japanese scale which is composed of four levels:  
29  
30  
31 1; JSC 0 (alert),  
32  
33  
34 2; JCS 1-digit code (disoriented but awake),  
35  
36  
37 3; JCS 2-digit code (arousable with stimulation),  
38  
39  
40 4; JSC 3-digit code (unarousable)  
41  
42  
43  
44  
45

### 46 *Statistical Analysis*

47  
48  
49  
50  
51

52 Statistical analyses used included Fisher exact tests for frequencies of listed  
53  
54 characteristics among the three stroke types, Student-t test for such numerical variables  
55  
56  
57  
58  
59  
60

1  
2  
3  
4  
5  
6 as age and systolic- and diastolic-blood pressures, and a log-rank test for Kaplan-Meier  
7  
8  
9 curves of estimated survival. The Mantel-Haenszel method and a logistic regression  
10  
11  
12 model were used to estimate univariate and multivariate odds ratios. Cox proportional  
13  
14  
15 hazards regressions were used to calculate age-, sex-, histories of hypertension,  
16  
17  
18 arrhythmia, diabetes mellitus and hyperlipemia, and use of tobacco and/or  
19  
20  
21 alcohol-adjusted hazard ratios and their 95% confidence intervals for the risk of death.  
22  
23  
24 Analyses were performed using SPSS ver.19 and statistical significance was set at  
25  
26  
27  $p < 0.05$ . All reported p values are 2-sided.  
28  
29  
30  
31

### 32 *Ethics Statement*

33  
34  
35

36 This research was performed in accordance with the ethical principles for  
37  
38  
39 medical research involving human subjects outlined in the Declaration of Helsinki. This  
40  
41  
42 research was approved by the Board of Directors, the Kyoto Medical Association, the  
43  
44  
45 Department of Health and Welfare, Kyoto Prefecture and Ethics Committee of the  
46  
47  
48 National Hospital Organization, Minami Kyoto Hospital. Since all identifying personal  
49  
50  
51 information was stripped from the secondary files before analysis, the boards waived  
52  
53  
54 the requirement for written informed consent from the patients involved.  
55  
56  
57  
58  
59  
60

## Results

We reviewed 14,268 stroke patients newly identified in Kyoto prefecture from January 1999 to December 2009. Of these 12,774 (89.5%) underwent CT, 9,232 (64.7%) an MRI scan, 2,504 (17.5%) angiography, and 342 (2.4%) scintigraphy for blood flow. Excluding 480 (3.3%) unclassified patients, the study cohort had 13,788 patients divided into 9,011 (65.4%) CI, 3,549 (25.7%) CH and 1,197 (8.7%) SAH cases. A small number of patients had a combination of stroke types as follows: 12 with CI and CH, 4 with CI and SAH, and 15 with CH and SAH. They were omitted. Table 1 summarizes the characteristics, risk factors, symptoms and mortality rate.

Table 1 Characteristics of Stroke Patients (n=13,788)

|                       | <b>Overall</b> | <b>Cerebral<br/>infarction</b> | <b>Cerebral<br/>hemorrhage</b> | <b>Subarachnoid<br/>hemorrhage</b> |
|-----------------------|----------------|--------------------------------|--------------------------------|------------------------------------|
|                       |                | <b>n=9,011</b>                 | <b>n=3,549</b>                 | <b>n=1,197</b>                     |
|                       |                | <b>(65.4%)</b>                 | <b>(25.7%)</b>                 | <b>(8.7%)</b>                      |
| <b>Age (mean± SD)</b> | 71.3 (12.9)    | 73.3<br>(11.8) <sup>*1*3</sup> | 69.1 (13.6)<br>*1*2            | 62.7 (13.5) <sup>*2*3</sup>        |

|                        |                    |                      |                      |                             |
|------------------------|--------------------|----------------------|----------------------|-----------------------------|
| <b>Sex, % female</b>   | 45.2 (6,233:7,555) | 42.3 <sup>*1*3</sup> | 45.9 <sup>*1*2</sup> | 64.6 <sup>*2*3</sup>        |
| <b>(n=female:</b>      |                    | (3,815:5,196)        | (1,630:1,919)        | (773:424)                   |
| <b>male)</b>           |                    |                      |                      |                             |
| <b>Systolic blood</b>  | 161.3 (35.5)       | 157.5                | 172.1 (34.8)         | 157.9 (37.0) <sup>*2</sup>  |
| <b>pressure (mean±</b> |                    | (28.3) <sup>*1</sup> | <sup>*1*2</sup>      |                             |
| <b>SD), mmHg</b>       |                    |                      |                      |                             |
| <b>Diastolic blood</b> | 87.6 (18.63)       | 85.6 (17.0)          | 93.1 (21.1)          | 86.8 (21.8) <sup>*2*3</sup> |
| <b>pressure (mean±</b> |                    | <sup>*1*3</sup>      | <sup>*1*2</sup>      |                             |
| <b>SD), mmHg</b>       |                    |                      |                      |                             |
| <b>Hypertension</b>    | 62.6 (8,005:4,780) | 62.0 <sup>*1*3</sup> | 68.5 <sup>*1*2</sup> | 49.9 <sup>*2*3</sup>        |
| <b>history, %</b>      |                    | (5,285:3,242)        | (2,183:1,006)        | (520:522)                   |
| <b>(n=with:</b>        |                    |                      |                      |                             |
| <b>without)</b>        |                    |                      |                      |                             |
| <b>Arrhythmia, %</b>   | 14.5               | 18.9 <sup>*1*3</sup> | 5.9 <sup>*1*2</sup>  | 7.2 <sup>*2*3</sup>         |
| <b>(n=with:</b>        | (1,932:11,352)     | (1,647:7,064)        | (200:3,209)          | (82:1,052)                  |
| <b>without)</b>        |                    |                      |                      |                             |
| <b>Arrhythmia</b>      | 18.5(2,357:10,415) | 24.3 <sup>*1*3</sup> | 7.5 <sup>*1*2</sup>  | 5.3 <sup>*2*3</sup>         |
| <b>history, %</b>      |                    | (2,060:6,432)        | (240:2,971)          | (55:985)                    |

---

|                       |                    |                            |                            |                            |
|-----------------------|--------------------|----------------------------|----------------------------|----------------------------|
| <b>(n=with:</b>       |                    |                            |                            |                            |
| <b>without)</b>       |                    |                            |                            |                            |
| <b>Diabetes</b>       | 20.9               | 24.8 <sup>*1*3</sup>       | 14.8 <sup>*1*2</sup>       | 6.9 <sup>*2*3</sup>        |
| <b>mellitus</b>       | (2,689:10,198)     | (2,138:6,475)              | (474:2,738)                | (71:963)                   |
| <b>history, %</b>     |                    |                            |                            |                            |
| <b>(n=with:</b>       |                    |                            |                            |                            |
| <b>without)</b>       |                    |                            |                            |                            |
| <b>Hyperlipemia</b>   | 19.2               | 23.1 <sup>*1*3</sup>       | 11.9 <sup>*1*2</sup>       | 9.2 <sup>*2*3</sup>        |
| <b>history, %</b>     | (2,419:10,198)     | (1,951:6,503)              | (371:2,755)                | (93:918)                   |
| <b>(n=with:</b>       |                    |                            |                            |                            |
| <b>without)</b>       |                    |                            |                            |                            |
| <b>Tobacco use, %</b> | 32.4 (3,665:7,642) | 32.6 <sup>*1*3</sup>       | 30.1 <sup>*1*2</sup>       | 37.1 <sup>*2*3</sup>       |
| <b>(n=with:</b>       |                    | (2,455:5,077)              | (843:1,956)                | (354:599)                  |
| <b>without)</b>       |                    |                            |                            |                            |
| <b>Non smoker, %</b>  | 67.6 (7,642)       | 67.4 (5,077) <sup>*3</sup> | 69.9 (1,956) <sup>*2</sup> | 62.9 (599) <sup>*2*3</sup> |
| <b>(n)</b>            |                    |                            |                            |                            |
| <b>Former</b>         | 5.4 (615)          | 5.8 (435) <sup>*3</sup>    | 5.7 (159) <sup>*2</sup>    | 2.1 (20) <sup>*2*3</sup>   |
| <b>smoker, % (n)</b>  |                    |                            |                            |                            |

---

|                        |                     |                              |                            |                            |
|------------------------|---------------------|------------------------------|----------------------------|----------------------------|
| <b>Light smoker, %</b> | 17.0 (1,918)        | 17.0 (1,281) <sup>*1*3</sup> | 14.6 (409) <sup>*1*2</sup> | 23.3 (222) <sup>*2*3</sup> |
| <b>(n)</b>             |                     |                              |                            |                            |
| <b>Heavy smoker, %</b> | 10.0 (1,132)        | 9.8 (739)                    | 9.8 (275)                  | 11.8 (112)                 |
| <b>(n)</b>             |                     |                              |                            |                            |
| <b>Alcohol use, %</b>  | 38.0 (4,202/6,851)  | 36.3 <sup>*1*3</sup>         | 40.5 <sup>*1*2</sup>       | 43.6 <sup>*2*3</sup>       |
| <b>(n=with:</b>        |                     | (2,654:4,655)                | (1,124:1,650)              | (412:533)                  |
| <b>without)</b>        |                     |                              |                            |                            |
| <b>Non drinker, %</b>  | 62.0 (6,851)        | 63.7 (4,655) <sup>*1*3</sup> | 59.5 (1,650) <sup>*1</sup> | 56.4 (533) <sup>*3</sup>   |
| <b>(n)</b>             |                     |                              |                            |                            |
| <b>Occasional</b>      | 15.3 (1,692)        | 15.5 (1,131) <sup>*1*3</sup> | 13.5 (374) <sup>*1*2</sup> | 18.9 (179) <sup>*2*3</sup> |
| <b>drinker, % (n)</b>  |                     |                              |                            |                            |
| <b>Every day</b>       | 22.7 (2,510)        | 20.8 (1,523) <sup>*1*3</sup> | 27.0 (750) <sup>*1</sup>   | 24.7 (233) <sup>*3</sup>   |
| <b>drinker, % (n)</b>  |                     |                              |                            |                            |
| <b>Paresis, %</b>      | 73.3 (9,670:3,525)  | 76.8 <sup>*1*3</sup>         | 78.5 <sup>*1*2</sup>       | 26.8 <sup>*2*3</sup>       |
| <b>(n=with:</b>        |                     | (6,750:2,041)                | (2,624:717)                | (277:756)                  |
| <b>without)</b>        |                     |                              |                            |                            |
| <b>Consciousness</b>   | 43.5 (5,914: 7,676) | 31.8 <sup>*1*3</sup>         | 65.7 <sup>*1</sup> (2,305: | 65.1 <sup>*3</sup> (775:   |
| <b>disturbance, %</b>  |                     | (2,815:                      | 1,201)                     | 415)                       |



|                                | <b>(n=with: 8,863)</b> |                              |                              |                            |
|--------------------------------|------------------------|------------------------------|------------------------------|----------------------------|
|                                | <b>without)</b>        |                              |                              |                            |
| <b>JCS 0, % (n)</b>            | 55.7 (7,676)           | 67.1 <sup>*1*3</sup> (6,048) | 33.8 <sup>*1*2</sup> (1,201) | 35.6 <sup>*2*3</sup> (415) |
| <b>JSC 1-digit code, % (n)</b> | 19.0 (2,619)           | 16.7 <sup>*1</sup> (1,508)   | 26.0 <sup>*1*2</sup> (921)   | 15.9 <sup>*2</sup> (185)   |
| <b>JSC 2-digit code, % (n)</b> | 11.6 (1,602)           | 8.6 <sup>*1*3</sup> (774)    | 17.5 <sup>*1</sup> (622)     | 16.7 <sup>*3</sup> (200)   |
| <b>JSC 3-digit code, % (n)</b> | 10.9 (1,509)           | 4.7 <sup>*1*3</sup> (421)    | 20.2 <sup>*1*2</sup> (716)   | 30.5 <sup>*2*3</sup> (365) |
| <b>JSC undetermined, % (n)</b> | 1.3 (184)              | 1.2 <sup>*3</sup> (112)      | 1.3 <sup>*2</sup> (46)       | 2.1 <sup>*2*3</sup> (25)   |
| <b>Delay time (mean± SD)</b>   | 3.91±4.82              | 4.20±5.21                    | 3.50±4.13                    | 3.13±3.77                  |
| <b>CT, % (n)</b>               | 89.7 (12,365)          | 85.1 (7,668)                 | 98.2 (3,485) <sup>*1</sup>   | 98.8 (1,183) <sup>*3</sup> |
|                                |                        | <sup>*1*3</sup>              |                              |                            |
| <b>MRI, % (n)</b>              | 64.5 (8,891)           | 79.8 (7,148)                 | 40.3 (1,429)                 | 25.1 (300) <sup>*1*3</sup> |
|                                |                        | <sup>*1*3</sup>              | <sup>*1*2</sup>              |                            |

|                          |                     |                     |                      |                      |
|--------------------------|---------------------|---------------------|----------------------|----------------------|
| <b>Surgery %</b>         | 16.0 (2,171:11,399) | 4.2                 | 26.1                 | 74.6 (871:297)       |
| <b>(n=with: without)</b> |                     | (374:8,495)         | (915:2,588)          | *1*3                 |
|                          |                     | *1*3                | *1*2                 |                      |
| <b>Mortality, %</b>      | 9.8 (1,344:12,391)  | 5.2 <sup>*1*3</sup> | 15.2 <sup>*1*2</sup> | 28.4 <sup>*2*3</sup> |
| <b>(n=dead: alive)</b>   |                     | (467:8,981)         | (536:2,997)          | (338:853)            |

When the numbers entered in the table above are significantly different between different types of strokes, they are marked as follows:

\*1: significant difference between cerebral infarction and cerebral hemorrhage;

\*2: significant difference between cerebral hemorrhage and subarachnoid hemorrhage;

\*3: significant difference between subarachnoid hemorrhage and cerebral infarction;

SD = Standard Deviation

Temporal trends of characteristics of stroke patients, comparing Group-A and Group-B, are summarized in Table 2 and hazard ratios for death, comparing the two groups are summarized in Table 3. The characteristics of stroke patients in Group-A and Group-B are summarized in supplementary Table 3.

Table 2 Temporal trends of characteristics of stroke patients, comparing Group-A and

Group-B

|                        | Group-A       | Group-B       | P      | Difference/OR                            |
|------------------------|---------------|---------------|--------|------------------------------------------|
| <b>Age (mean± SD)</b>  | 70.5±12.7     | 72.3±13.0     | <0.001 | -1.85<br>(-2.28~-1.41)<br>* <sup>1</sup> |
| <b>Sex, % female</b>   | 44.8          | 45.7          | 0.505  | 1.02                                     |
| <b>(n=female:</b>      | (3,531:4,349) | (2,702:3,206) |        | (0.96~1.09)* <sup>2</sup>                |
| <b>male)</b>           |               |               |        |                                          |
| <b>Systolic blood</b>  | 161.5±31.6    | 161±31.5      | 0.449  | 0.41                                     |
| <b>pressure (mean±</b> |               |               |        | (-0.66~1.49)* <sup>1</sup>               |
| <b>SD), mmHg</b>       |               |               |        |                                          |
| <b>Diastolic blood</b> | 87.3±18.7     | 88.0±19.0     | 0.036  | -0.69                                    |
| <b>pressure (mean±</b> |               |               |        | (-1.33~-0.05)* <sup>1</sup>              |
| <b>SD), mmHg</b>       |               |               |        |                                          |
| <b>Hypertension</b>    | 60.2          | 65.9          | <0.001 | 1.27                                     |
| <b>history, %</b>      | (4,379:2,900) | (3,626:1,880) |        | (1.19~1.38)* <sup>2</sup>                |
| <b>(n=with:</b>        |               |               |        |                                          |

|                       |               |               |        |                            |
|-----------------------|---------------|---------------|--------|----------------------------|
| <b>without)</b>       |               |               |        |                            |
| <b>Arrhythmia, %</b>  | 14.9          | 14.0          | 0.079  | 0.92                       |
| <b>(n=with:</b>       | (1,132:6,446) | (800:4,906)   |        | (0.83~1.01) * <sup>2</sup> |
| <b>without)</b>       |               |               |        |                            |
| <b>Arrhythmia</b>     | 19.0 (74.7)   | 17.7          | 0.059  | 0.92                       |
| <b>history, %</b>     |               | (974:4,531)   |        | (0.84~1.00) * <sup>2</sup> |
| <b>(n=with:</b>       |               |               |        |                            |
| <b>without)</b>       |               |               |        |                            |
| <b>Diabetes</b>       | 20.5          | 21.4          | 0.327  | 1.04                       |
| <b>mellitus</b>       | (1,500:5,827) | (1,189:4,371) |        | (0.96~1.14) * <sup>2</sup> |
| <b>history, %</b>     |               |               |        |                            |
| <b>(n=with:</b>       |               |               |        |                            |
| <b>without)</b>       |               |               |        |                            |
| <b>Hyperlipemia</b>   | 17.5          | 21.4          | <0.001 | 1.27                       |
| <b>history, %</b>     | (1,250:5,910) | (1,169:4,288) |        | (1.16~1.39) * <sup>2</sup> |
| <b>(n=with:</b>       |               |               |        |                            |
| <b>without)</b>       |               |               |        |                            |
| <b>Tobacco use, %</b> | 33.6          | 30.9          | 0.001  | 0.88                       |

|  |                       |               |               |        |                              |
|--|-----------------------|---------------|---------------|--------|------------------------------|
|  | (n=with:              | (2,152:4,259) | (1,513:3,383) |        | (0.81~0.95) * <sup>2</sup>   |
|  | without)              |               |               |        |                              |
|  | <b>Alcohol use, %</b> | 39.5          | 36.1 (1,724)  | 0.002  | 0.89                         |
|  | (n=with:              | (2,478:3,797) |               |        | (0.82~0.96) * <sup>2</sup>   |
|  | without)              |               |               |        |                              |
|  | <b>Paresis, %</b>     | 73.7          | 72.7          | 0.116  | 0.94                         |
|  | (n=with:              | (5,581:1,987) | (4,087:1,534) |        | (0.87~1.02) * <sup>2</sup>   |
|  | without)              |               |               |        |                              |
|  | <b>Consciousness</b>  | 42.4          | 45.0          | 0.055  | 1.07                         |
|  | <b>disturbance, %</b> | (3,290:4,463) | (2,624:3,207) |        | (1.00~1.14) * <sup>2</sup>   |
|  | (n=with:              |               |               |        |                              |
|  | without)              |               |               |        |                              |
|  | <b>Delay time</b>     | 4.15±5.03     | 3.60±4.54     | <0.001 | -0.55                        |
|  | (mean± SD)            |               |               |        | (-0.73~-0.38) * <sup>1</sup> |
|  | <b>CT, % (n)</b>      | 92.4 (7,285)  | 86.1 (5,080)  | <0.001 | 0.51                         |
|  |                       |               |               |        | (0.45~0.57) * <sup>2</sup>   |
|  | <b>MRI, % (n)</b>     | 59.4 (4,682)  | 71.3 (4,209)  | <0.001 | 1.68                         |
|  |                       |               |               |        | (1.56~1.80) * <sup>2</sup>   |

|                        |                 |             |        |                            |
|------------------------|-----------------|-------------|--------|----------------------------|
| <b>Surgery %</b>       | 17.6            | 13.9        | <0.001 | 0.76                       |
| <b>(n=with:</b>        | (1,356:6,339)   | (815:5,060) |        | (0.69~0.83) * <sup>2</sup> |
| <b>without)</b>        |                 |             |        |                            |
| <b>Mortality, %</b>    | 9.5 (745:7,097) | 10.2        | 0.771  | 1.02                       |
| <b>(n=dead: alive)</b> |                 | (599:5,294) |        | (0.91~1.14) * <sup>2</sup> |

\*<sup>1</sup>Mean difference (Group-A – Group-B) with 95% confidence interval of the difference

\*<sup>2</sup>Mantel-Haenszel common odds ratio (Group-B/Group-A) with 95% confidence

interval

OR= Odds Ratio

Table 3 Hazard Ratios for death, comparing Group-A and Group-B

|                     | Hazard Ratio<br>(Group-B/Group-A) | 95% Confidence Interval |       | p     |
|---------------------|-----------------------------------|-------------------------|-------|-------|
|                     |                                   | Lower                   | Upper |       |
|                     |                                   | Over all                | 1.33  |       |
| Cerebral infarction | 1.33                              | 1.04                    | 1.70  | 0.021 |
| Cerebral hemorrhage | 1.06                              | 0.83                    | 1.34  | 0.650 |

|                         |      |      |      |       |
|-------------------------|------|------|------|-------|
| Subarachnoid hemorrhage | 1.25 | 0.92 | 1.70 | 0.147 |
|-------------------------|------|------|------|-------|

Adjusted for age, sex, histories of hypertension, arrhythmia, diabetes mellitus and hyperlipemia, and use of tobacco and/or alcohol

Odds ratios for the prevalence of risk factors among stroke subtypes, adjusted for age and sex, were calculated using a logistic regression model and are summarized in Table 4.

Table 4 Odds Ratios for the prevalence of risk factors among stroke subtypes, adjusted for age and sex

|                                      | Odds Ratio | 95% Confidence Interval |       | p      |
|--------------------------------------|------------|-------------------------|-------|--------|
|                                      |            | Lower                   | Upper |        |
| <b>History of hypertension</b>       |            |                         |       |        |
| <b>Cerebral infarction (CI)</b>      | Reference  |                         |       |        |
| <b>Cerebral hemorrhage (CH)</b>      | 1.36       | 1.25                    | 1.49  | <0.001 |
| <b>Subarachnoid hemorrhage (SAH)</b> | 0.65       | 0.57                    | 0.74  | <0.001 |
| <b>History of arrhythmia</b>         |            |                         |       |        |

|                                     |           |      |      |        |
|-------------------------------------|-----------|------|------|--------|
| <b>CI</b>                           | Reference |      |      |        |
| <b>CH</b>                           | 0.28      | 0.24 | 0.33 | <0.001 |
| <b>SAH</b>                          | 0.26      | 0.19 | 0.34 | <0.001 |
| <b>History of diabetes mellitus</b> |           |      |      |        |
| <b>CI</b>                           | Reference |      |      |        |
| <b>CH</b>                           | 0.49      | 0.44 | 0.55 | <0.001 |
| <b>SAH</b>                          | 0.20      | 0.16 | 0.26 | <0.001 |
| <b>History of hyperlipemia</b>      |           |      |      |        |
| <b>CI</b>                           | Reference |      |      |        |
| <b>CH</b>                           | 0.40      | 0.35 | 0.45 | <0.001 |
| <b>SAH</b>                          | 0.24      | 0.19 | 0.30 | <0.001 |

Table 1 also shows a history of hypertension in 12,785 (92.7%), arrhythmia in 12,772 (92.6%), diabetes mellitus in 12,887 (93.5%), hyperlipemia in 12,617 (91.5%), tobacco usage in 11,307 (82.0%), alcohol usage in 11,053 (80.2%), and paresis in 13,195 (96.7%). We were able to classify 13,406 (97.2%) patients into four consciousness levels, excluding 184 (1.3%) patients with uncategorized stroke and 580



(4.2%) patients with no reliable information on consciousness levels. Calculation of the mean delay time excluded 4,964 (36.0%) patients with unknown onset. Patients received primary medical care within 3 hours of onset in 54.3% of CI, 68.5% of CH, and 76.4% of SAH.

Of 13,788 patients, 13,735 (99.6%) had a confirmed record of survival or death 30 days after stroke onset. A total of 1,344 (9.8%) patients died within this time period.

Figure 1 shows Kaplan-Meier Survival curves, comparing stroke subtypes, and reveals a significant difference ( $p < 0.001$ ) between any two subtypes by the log-rank test.

Compared to CI, CH and SAH hazard ratios for fatality were 3.66 (3.07-4.37,  $p < 0.001$ ), and 8.91 (7.18-11.06,  $p < 0.001$ ), when adjusted for age, sex, histories of hypertension, arrhythmia, diabetes mellitus and hyperlipemia and use of tobacco and/or alcohol (Table 5).

Table 5 Hazard ratios for death, comparing stroke subtypes

|                            | HR        | 95% Confidence Interval |       | p |
|----------------------------|-----------|-------------------------|-------|---|
|                            |           | Lower                   | Upper |   |
| <b>Cerebral infarction</b> | Reference |                         |       |   |

|                                |      |      |       |        |
|--------------------------------|------|------|-------|--------|
| <b>Cerebral hemorrhage</b>     | 3.71 | 3.11 | 4.43  | <0.001 |
| <b>Subarachnoid hemorrhage</b> | 8.95 | 7.21 | 11.11 | <0.001 |

Adjusted for age, sex, histories of hypertension, arrhythmia, diabetes mellitus and hyperlipemia, and use of tobacco and/or alcohol

Hazard ratios for death, comparing stroke subtypes, in Group-A and Group-B are summarized in Supplementary Table 4 A and B.

## Discussion

The study summarized the stroke registry covering the entire prefecture for 11 years. Hospitals affiliated to the Kyoto Medical Association registered new stroke patients based on inclusion and exclusion criteria in accordance with the Kyoto municipal ordinance, avoiding area or hospital preferences.

1  
2  
3  
4  
5  
6 One of the major purposes of these prefectural stroke registries is to clarify the  
7  
8  
9 current situation concerning stroke events in order to maintain and improve health care.  
10  
11 In Japan, health care systems largely depend on the prefectural governments, and  
12  
13 information on each prefecture is therefore important. Japan has 47 prefectures. There  
14  
15 are five stroke registries based on populations in the entire prefectures: the Akita Stroke  
16  
17 Registry (ASR) [12-15], the Iwate Stroke Registry (ISR) [16], the Tochigi Stroke  
18  
19 Registry (TSR) [17 18], the Miyazaki Stroke Registry (MSR) [19] and the KSR.  
20  
21  
22  
23  
24  
25  
26 Although each prefectural registry reports the result annually to the local government, to  
27  
28 health care centers, and to the public, most are not available in scientific English  
29  
30 literature. We summarize incidence information based on the KSR in supplementary  
31  
32 Tables 2 A, B and C. The ASR has published age-adjusted gender-specific incidence.  
33  
34  
35  
36  
37  
38 Although we could not find age-adjusted gender-specific incidence among the other  
39  
40 prefectural stroke registries, the TSR and MSR have reported data on the numbers of  
41  
42 patients they registered. We calculated age-adjusted gender-specific incidence in the  
43  
44 TSR and MSR based on their annual reports and summarize them in supplementary  
45  
46  
47  
48  
49  
50 Tables 2 D-I. The ISR says that their reports will soon be ready [20]. All the prefectural  
51  
52 registries ask as many hospitals and facilities as possible to register all stroke events.  
53  
54  
55  
56  
57  
58  
59  
60 Registration, however, is not mandatory but depends on the voluntary contributions of

1  
2  
3  
4  
5  
6 the hospitals. Therefore, registries for more restricted areas may be better suited to  
7  
8 clarify stroke incidence in a community. Takashima and Hisayama are two such areas.  
9  
10 The incidence rates of stroke reported from the Takashima Stroke Registry [21-24] and  
11  
12 the Hisayama Study [25-27] are higher than those from the prefectural stroke registries.  
13  
14 The Hisayama study is reported to cover about 80 % of the residents (aged 40 or over)  
15  
16 of the area, which has a population of about 8,400 [28]. Age-standardized incidence  
17  
18 rates (per 10,000 person-years) of stroke in the 3<sup>rd</sup> cohort (1988-2000) of the Hisayama  
19  
20 Study are 529 in men and 388 in women [25]. The incidence ratios for men:women for  
21  
22 the subtypes of stroke are 357:77 for CI, 130:21 for CH and 42:13 for SAH [25].  
23  
24  
25  
26  
27  
28  
29  
30  
31  
32  
33  
34

35 The average annual mortality from CH is 3.9 per 1,000 person-years of  
36  
37 experience (PYE), whereas that from CI is 6.5 in the Hisayama population aged 40 and  
38  
39 over [12]. Some prefectural stroke registries report mortality rates. In the TSR, they  
40  
41 were 10%, 16% and 29% in CI, CH and SAH, respectively [17]. According to the ASR,  
42  
43 survival rates were 94%, 92%, 83%, 84%, 70% and 70% in CI-men, CI-women,  
44  
45 CH-men, CH-women, SAH-men and SAH-women, respectively [14 15]. These figures  
46  
47 generally agree with the results for the KSR. The present study added age, sex, histories  
48  
49  
50  
51  
52  
53  
54  
55  
56  
57  
58  
59  
60

1  
2  
3  
4  
5  
6 of hypertension, arrhythmia, diabetes, hyperlipemia, and use of tobacco and/or alcohol  
7  
8  
9 as adjusted hazard ratios for death in each stroke subtype.  
10

11  
12  
13  
14  
15 In the KSR, voluntary contributions have built up a registry of 14,268 stroke  
16  
17 patients over 11 years. Compared with the other prefectural registries, one of the  
18  
19 outstanding strengths of the KSR is that it has information on survival up to 30 days  
20  
21 after the onset in 13,735 patients out of the 13,788 patients in this cohort (99.6%). These  
22  
23 data make it possible to analyse relationships between various factors and early  
24  
25 mortality. A strength of stroke registry in Japan is that it includes a large amount of CT  
26  
27 and MRI data. Japan has the most MRI units (40 U per million population) and CT  
28  
29 scanners (93 U per million population) among developed countries [29]. In the study  
30  
31 cohort, 12,365 patients (89.7%) had a CT examination and 8,891 patients (64.5%) had a  
32  
33 MRI examination. The study added information on recent trends on the usage of these  
34  
35 examinations. As expected, the usage of CT declined whereas the usage of MRI  
36  
37 increased with time over the study period of 11 years.  
38  
39  
40  
41  
42  
43  
44  
45  
46  
47  
48  
49  
50

51  
52 In agreement with previous reports, CI had the highest incidence, followed by  
53  
54 CH and SAH [26]. The data add the information that SAH constitutes about a fourth of  
55  
56  
57  
58  
59  
60

1  
2  
3  
4  
5  
6 hemorrhagic strokes. The age distribution also confirms the result of previous reports,  
7  
8  
9 the oldest mean age being in CH and the youngest in SAH [30]. The elderly patients  
10  
11 showed a greater proportional difference in stroke subtypes. For example, in patients  
12  
13 who were 71 years or older, the proportions were 73.1% CI (n=5,616), 22.3% CH  
14  
15 (n=1,709), and 4.6% SAH (n=353), as compared to the younger group who showed  
16  
17 55.8% (n=3,395), 30.3% (n=1,840) and 13.9% (n=844).  
18  
19  
20  
21  
22

23  
24 Most of the other characteristics also showed significant differences among the  
25  
26 three stroke subtypes. The overall registry had more male patients than female, except  
27  
28 that almost two-thirds of the SAH cases were female. The initial medical examination  
29  
30 revealed higher systolic and diastolic blood pressures in CH than in CI, possibly  
31  
32 reflecting an intracranial mass effect on brain edema [31 32].  
33  
34  
35  
36  
37

38  
39 Patients with disturbed consciousness had a higher ( $p<0.001$ ) systolic/diastolic  
40  
41 blood pressure (mean  $\pm$  SD:  $164.0 \pm 35.2/88.6 \pm 20.9$ ) than the remainder ( $159.3 \pm$   
42  
43  $28.2/87.0 \pm 17.1$ ), implying possible association between stroke severity and degree of  
44  
45 hypertension.  
46  
47  
48

49  
50 Risk factors for stroke include hypertension [33], arrhythmia [34], diabetes  
51  
52 mellitus [35 36], hyperlipemia [37], alcohol use [38 39], and tobacco use. Except for  
53  
54 tobacco and alcohol use, these factors were noted most often in CI, followed by CH,  
55  
56  
57  
58  
59  
60

1  
2  
3  
4  
5  
6 and least in SAH. Hypertension probably plays the most important role since it was  
7  
8  
9 found in more than 60 % of all stroke patients. A history of arrhythmia and diabetes  
10  
11  
12 mellitus, relatively high in CI and lower in CH, was rarely found in SAH. These data  
13  
14  
15 suggest a limited association between these three factors and hemorrhagic strokes. The  
16  
17  
18 Ministry of Health, Labour and Welfare of Japan, has estimated morbidity rates of  
19  
20  
21 hypertension, diabetes mellitus and hyperlipemia among Japanese aged from 40 to 74 as  
22  
23  
24 49.9%, 11.4% and 17.7%, respectively. In our series, a history of hypertension exceeded  
25  
26  
27 this estimate in CI and CH. A history of diabetes mellitus was higher in CI and CH, but  
28  
29  
30 lower in SAH, suggesting that this may not be a risk factor in SAH. A history of  
31  
32  
33 hyperlipemia was also lower in SAH than the morbidity rate, also suggesting that this  
34  
35  
36 may not a risk factor in SAH. These data may not add sufficient information on the  
37  
38  
39 effect of risk factors on stroke occurrence. The registry data are not meant to correlate  
40  
41  
42 factors with the risk of stroke. The registry data, however, are appropriate to determine  
43  
44  
45 the prevalence of different risk factors among stroke patients. The higher prevalence of  
46  
47  
48 any factor in a certain group may indicate a higher association between that factor and  
49  
50  
51 that group. This study added information on the prevalence of various risk factors  
52  
53  
54 among stroke patients and clarified differences among stroke subtypes. We also added  
55  
56  
57 multivariate analyses. Using a logistic regression model, we estimated odds ratios and  
58  
59  
60

1  
2  
3  
4  
5  
6 95% confidence intervals for the prevalence of these risk factors comparing each stroke  
7  
8  
9 subtype after adjusting for age and sex.

10  
11 Alcohol and tobacco use showed a higher correlation with SAH than with the  
12  
13 other types of stroke in a surveillance conducted under the same conditions for the three  
14  
15 subtypes of stroke. Alcohol and tobacco use may therefore increase the risk of SAH  
16  
17 more than the risk of CI or CH. The proportion of heavy smokers was not different  
18  
19 among stroke subtypes, whereas the proportion of every day drinkers was higher in  
20  
21 hemorrhagic strokes than in ischemic stroke. Paresis developed more often in CI and  
22  
23 CH than in SAH. Hemorrhagic stroke caused more consciousness disturbance than  
24  
25 ischemic stroke did.  
26  
27  
28  
29  
30  
31  
32  
33  
34

35 The characteristics significantly different between Group-A and Group-B were  
36  
37 age, diastolic blood pressure, histories of hypertension and hyperlipemia, tobacco and  
38  
39 alcohol use, delay time and surgery. The hazard ratio for death in cerebral infarction was  
40  
41 significantly higher in Group-B than in Group-A after adjustment for age, sex, histories  
42  
43 of risk factors and use of tobacco and alcohol. Although delay time is shorter in  
44  
45 Group-B than Group-A, there is no significant improvement in mortality.  
46  
47  
48  
49  
50  
51

52 We calculated mortality based on the information up to 30 days after the stroke  
53  
54 onset, excluding those who died later. Early mortality suggests stroke effects, whereas  
55  
56  
57  
58  
59  
60



1  
2  
3  
4  
5  
6 long term mortality reflects aftereffects and complications. Thus, early mortality serves  
7  
8  
9 to evaluate the severity of the three major stroke subtypes. Death in the first month after  
10  
11  
12 stroke mainly results from neurological causes such as brain edema[40], followed by  
13  
14  
15 complications of immobility including pneumonia [41].  
16

17  
18 The mortality rate of ischemic stroke and risk characteristics must vary by subtypes,  
19  
20  
21 such as embolic stroke and lacunar stroke. However, sufficient information to classify  
22  
23  
24 ischemic stroke into more detailed categories was not available in this study. There are  
25  
26  
27 some resemblance and differences among prefectural stroke registries in various ways,  
28  
29  
30 such as age and sex distribution of strokes and annual monitoring rates of subtype in  
31  
32  
33 stroke. Although, it is difficult to explain the differences sufficiently, factors which  
34  
35  
36 possibly influence the registries and stroke incidence include regional medical services,  
37  
38  
39 socio-epidemiological factors, including industries and climates, prevalence of risk  
40  
41  
42 factors and constitution of societies. Prefectural stroke registries continue efforts to  
43  
44  
45 register as many stroke events as possible, which is, however, often difficult to  
46  
47  
48 accomplish. Nevertheless, since stroke incidence and characteristics may differ from  
49  
50  
51 area to area and from period to period, it is important to continue the registries in order  
52  
53  
54 to elucidate the current situation of stroke and subsequently improve stroke care in each  
55  
56  
57 prefecture.  
58  
59  
60

### *Limitations*

1  
2  
3  
4  
5  
6  
7  
8  
9  
10  
11  
12  
13  
14  
15  
16  
17  
18  
19  
20  
21  
22  
23  
24  
25  
26  
27  
28  
29  
30  
31  
32  
33  
34  
35  
36  
37  
38  
39  
40  
41  
42  
43  
44  
45  
46  
47  
48  
49  
50  
51  
52  
53  
54  
55  
56  
57  
58  
59  
60

Firstly, there may be missing data for stroke patients; for example, patients who died before arriving in hospitals and patients who went to hospitals outside of the prefecture. Patients with mild symptoms may not have visited hospitals and patients with atypical symptoms may not have been diagnosed as such, and consequently, may not have been registered [5].

Secondarily, the study did not include the types of therapeutic interventions, which must have an effect on mortality. It is virtually impossible to adjust for all the treatments in a very large population based study. Treatments should be studied in randomized controlled studies. The causes of death in the study cohort were also not investigated.

A possible bias exists in the assessment of variables, such as in the history of habits, which largely depends on the patients' self reports or information from their families. The problem, however, applied equally to all three subtypes. The study did show the overall characteristics and mortality in stroke and in major subtypes, which should shed light on the differences.

1  
2  
3  
4  
5  
6 Lastly, the outcome assessment limited to 30 days after onset leaves the  
7  
8  
9 majority of patients (n=11,869, 86.1%) who survived the first month out of  
10  
11  
12 consideration. However, early mortality should reflect a cause of death directly  
13  
14 associated with stroke and therefore correlate with severity in a direct way.  
15  
16  
17  
18  
19

### 20 **Conclusion**

21  
22  
23 We have presented population based data accrued over 11 years in the Kyoto  
24  
25  
26 prefecture in Japan. As for the major stroke subtypes, the hazard ratio for death was  
27  
28  
29 highest in SAH, followed by CH and lowest in CI.  
30  
31  
32  
33  
34

### 35 **Acknowledgments**

36  
37  
38 We acknowledge the contribution of participating institutions and their staffs who  
39  
40  
41 provided the data in the Kyoto Stroke Registry.  
42  
43  
44  
45

### 46 **Figure Legends**

47  
48  
49 Kaplan-Meier survival curves of stroke patients  
50  
51  
52  
53  
54  
55  
56  
57  
58  
59  
60

1  
2  
3  
4  
5  
6  
7  
8  
9  
10  
11  
12  
13  
14  
15  
16  
17  
18  
19  
20  
21  
22  
23  
24  
25  
26  
27  
28  
29  
30  
31  
32  
33  
34  
35  
36  
37  
38  
39  
40  
41  
42  
43  
44  
45  
46  
47  
48  
49  
50  
51  
52  
53  
54  
55  
56  
57  
58  
59  
60

For peer review only

## References

1. Turin TC, Kokubo Y, Murakami Y, et al. Lifetime risk of acute myocardial infarction in Japan. *Circulation*. 2010;**3**(6):701-3
2. Scarborough P, Morgan RD, Webster P, et al. Differences in coronary heart disease, stroke and cancer mortality rates between England, Wales, Scotland and Northern Ireland: the role of diet and nutrition. *BMJ open* 2011;**1**(1):e000263 doi: 10.1136/bmjopen-2011-000263
3. Lee S, Shafe AC, Cowie MR. UK stroke incidence, mortality and cardiovascular risk management 1999-2008: time-trend analysis from the General Practice Research Database. *BMJ open* 2011;**1**(2):e000269 doi: 10.1136/bmjopen-2011-000269
4. Anderson GL, Whisnant JP. A comparison of trends in mortality from stroke in the United States and Rochester, Minnesota. *Stroke*. 1982;**13**(6):804-9
5. Shigematsu K, Shimamura O, Nakano H, et al. Vomiting should be a prompt predictor of stroke outcome. *Emergency medicine journal : EMJ* 2012 doi: 10.1136/emmermed-2012-201586
6. Hatano S. Experience from a multicentre stroke register: a preliminary report. *Bulletin of the World Health Organization* 1976;**54**(5):541-53
7. International Classification of Diseases, Ninth Revision, Clinical Modification. Washington, DC: US Department of Health and Human Service. 1988
8. Steindel SJ. International classification of diseases, 10th edition, clinical modification and procedure coding system: descriptive overview of the next generation HIPAA code sets. *Journal of the American Medical Informatics Association : JAMIA* 2010;**17**(3):274-82
9. Kuzuya T. [Outline of revision of classification and diagnostic criteria of diabetes mellitus in Japan]. *Nihon rinsho*. 1999;**57**(3):561-6
10. Ohta T, Waga S, Handa W, et al. [New grading of level of disordered consciousness (author's transl)]. *No shinkei geka. Neurological surgery* 1974;**2**(9):623-7
11. Ohta T, Kikuchi H, Hashi K, et al. Nizofenone administration in the acute stage following subarachnoid hemorrhage. Results of a multi-center controlled double-blind clinical study. *Journal of neurosurgery* 1986;**64**(3):420-6
12. Ueda K, Omae T, Hirota Y, et al. Decreasing trend in incidence and mortality from stroke in Hisayama residents, Japan. *Stroke* 1981;**12**(2):154-60

- 1  
2  
3  
4  
5  
6  
7  
8  
9  
10  
11  
12  
13  
14  
15  
16  
17  
18  
19  
20  
21  
22  
23  
24  
25  
26  
27  
28  
29  
30  
31  
32  
33  
34  
35  
36  
37  
38  
39  
40  
41  
42  
43  
44  
45  
46  
47  
48  
49  
50  
51  
52  
53  
54  
55  
56  
57  
58  
59  
60
13. The Akita Stroke Registry. Secondary Akita Stroke Registry.  
<http://www.msuisin.jp/blog/21nousochu.pdf>.
14. Suzuki K. Stroke recurrence. Treatment 2009;**9**:5-10.
15. Suzuki K. Epidemiology on recurrent stroke. Prevention of Atherosclerosis  
2010;**91**:2560-4
16. The Iwate Cancer and Stroke Registry. Secondary Iwate Cancer and Stroke Registry.  
[http://www.iwate.med.or.jp/gan\\_nou/index.html](http://www.iwate.med.or.jp/gan_nou/index.html).
17. The Tochigi Stroke Registry. Secondary Tochigi Stroke Registry.  
<http://www.pref.tochigi.lg.jp/e04/welfare/kenkoudukuri/kenkoudukuri/1173225926699.html>.
18. Welcome to the official homepage of Tochigi Prefecture, Japan. Secondary Welcome to the official homepage of Tochigi Prefecture, Japan.  
<http://www.pref.tochigi.lg.jp/english/foreignlanguage.html#english>.
19. The Miyazaki Stroke Registry. Secondary Miyazaki Stroke Registry 2010.  
<http://www.msuisin.jp/blog/21nousochu.pdf>.
20. The Iwate Stroke Registry. Secondary Iwate Stroke Registry.  
<http://www.pref.iwate.jp/~hp1353/hoken/toukei/nousottyu/index.html>.
21. Turin TC, Kita Y, Murakami Y, et al. Higher stroke incidence in the spring season regardless of conventional risk factors: Takashima Stroke Registry, Japan, 1988-2001. Stroke; a journal of cerebral circulation 2008;**39**(3):745-52
22. Turin TC, Kita Y, Murakami Y, et al. Increase of stroke incidence after weekend regardless of traditional risk factors: Takashima Stroke Registry, Japan; 1988-2003. Cerebrovascular diseases 2007;**24**(4):328-37
23. Kita Y, Turin TC, Rumana N, et al. Surveillance and measuring trends of stroke in Japan: the Takashima Stroke Registry (1988 - present). International journal of stroke 2007;**2**(2):129-32
24. Turin TC, Kita Y, Rumana N, et al. Registration and surveillance of acute myocardial infarction in Japan: monitoring an entire community by the Takashima AMI Registry: system and design. Circulation journal 2007;**71**(10):1617-21
25. Kubo M, Kiyohara Y, Kato I, et al. Trends in the incidence, mortality, and survival rate of cardiovascular disease in a Japanese community: the Hisayama study. Stroke 2003;**34**(10):2349-54
26. Kiyohara Y, Kubo M, Kato I, et al. Ten-year prognosis of stroke and risk factors for death in a Japanese community: the Hisayama study. Stroke 2003;**34**(10):2343-7

- 1
  - 2
  - 3
  - 4
  - 5
  - 6
  - 7
  - 8
  - 9
  - 10
  - 11
  - 12
  - 13
  - 14
  - 15
  - 16
  - 17
  - 18
  - 19
  - 20
  - 21
  - 22
  - 23
  - 24
  - 25
  - 26
  - 27
  - 28
  - 29
  - 30
  - 31
  - 32
  - 33
  - 34
  - 35
  - 36
  - 37
  - 38
  - 39
  - 40
  - 41
  - 42
  - 43
  - 44
  - 45
  - 46
  - 47
  - 48
  - 49
  - 50
  - 51
  - 52
  - 53
  - 54
  - 55
  - 56
  - 57
  - 58
  - 59
  - 60
27. Hata J, Tanizaki Y, Kiyohara Y, et al. Ten year recurrence after first ever stroke in a Japanese community: the Hisayama study. *Journal of neurology, neurosurgery, and psychiatry* 2005;**76**(3):368-72
28. Department of Environmental Medicine GSoMS, Kyushu University. About the Hisayama study. Secondary About the Hisayama study.  
<http://www.med.kyushu-u.ac.jp/envmed/about/index.html>.
29. Turin TC, Kita Y, Rumana N, et al. Ischemic stroke subtypes in a Japanese population: Takashima Stroke Registry, 1988-2004. *Stroke* 2010;**41**(9):1871-6
30. Tanaka H, Ueda Y, Hayashi M, et al. Risk factors for cerebral hemorrhage and cerebral infarction in a Japanese rural community. *Stroke* 1982;**13**(1):62-73
31. Hacke W, Schwab S, Horn M, et al. 'Malignant' middle cerebral artery territory infarction: clinical course and prognostic signs. *Archives of neurology* 1996;**53**(4):309-15
32. Klatzo I. Brain oedema following brain ischaemia and the influence of therapy. *British journal of anaesthesia* 1985;**57**(1):18-22
33. Collins R, Peto R, MacMahon S, et al. Blood pressure, stroke, and coronary heart disease. Part 2, Short-term reductions in blood pressure: overview of randomised drug trials in their epidemiological context. *Lancet* 1990;**335**(8693):827-38
34. Wolf PA, Abbott RD, Kannel WB. Atrial fibrillation as an independent risk factor for stroke: the Framingham Study. *Stroke* 1991;**22**(8):983-8
35. Abbott RD, Donahue RP, MacMahon SW, et al. Diabetes and the risk of stroke. The Honolulu Heart Program. *JAMA* 1987;**257**(7):949-52
36. Wolf PA, D'Agostino RB, Belanger AJ, et al. Probability of stroke: a risk profile from the Framingham Study. *Stroke* 1991;**22**(3):312-8
37. Iso H, Jacobs DR, Jr., Wentworth D, et al. Serum cholesterol levels and six-year mortality from stroke in 350,977 men screened for the multiple risk factor intervention trial. *The New England journal of medicine* 1989;**320**(14):904-10
38. Bazzano LA, Gu D, Reynolds K, et al. Alcohol consumption and risk for stroke among Chinese men. *Annals of neurology* 2007;**62**(6):569-78
39. Djousse L, Ellison RC, Beiser A, et al. Alcohol consumption and risk of ischemic stroke: The Framingham Study. *Stroke* 2002;**33**(4):907-12
40. Balami JS, Chen RL, Grunwald IQ, et al. Neurological complications of acute ischaemic stroke. *Lancet neurology* 2011;**10**(4):357-71
41. Lavados PM, Sacks C, Prina L, et al. Incidence, 30-day case-fatality rate, and prognosis of stroke in Iquique, Chile: a 2-year community-based prospective study (PISCIS project). *Lancet* 2005;**365**(9478):2206-15

1  
2  
3  
4  
5  
6  
7  
8  
9  
10  
11  
12  
13  
14  
15  
16  
17  
18  
19  
20  
21  
22  
23  
24  
25  
26  
27  
28  
29  
30  
31  
32  
33  
34  
35  
36  
37  
38  
39  
40  
41  
42  
43  
44  
45  
46  
47  
48  
49  
50  
51  
52  
53  
54  
55  
56  
57  
58  
59  
60

For peer review only



1  
2  
3  
4  
5  
6  
7  
8  
9 Characteristics, risk factors and mortality of stroke patients in Kyoto, Japan

10  
11  
12  
13  
14 **Short title:** Characteristics, risk factors and mortality of Stroke

15  
16  
17  
18  
19 Kazuo Shigematsu<sup>1</sup>, Hiromi Nakano<sup>2</sup>, Yoshiyuki Watanabe<sup>3</sup>, Tatsuyuki Sekimoto<sup>4</sup>,  
20  
21 Kouichiro Shimizu<sup>5</sup>, Akihiko Nishizawa<sup>6</sup>, Masahiro Makino<sup>7</sup>, Atsushi Okumura<sup>8</sup>,  
22  
23  
24 Kazuhiko Bando<sup>9</sup>, Yasushi Kitagawa<sup>10</sup>  
25

26  
27  
28 From: <sup>1</sup>National Hospital Organization, Minami Kyoto Hospital, <sup>2</sup>Kyoto Kidugawa  
29  
30 Hospital, <sup>3</sup>Kyoto Prefectural University of Medicine, <sup>4</sup>Kyoto Yosanoumi Hospital,  
31  
32  
33 <sup>5</sup>Kyoto Fushimi Shimizu Hospital, <sup>6</sup>The Nishizawa Clinic, <sup>7</sup>Japanese Red Cross Kyoto  
34  
35 Daini Hospital, <sup>8</sup>Jujoyo Rehabilitation Hospital, <sup>9</sup>The Bando Clinic, <sup>10</sup>The Kitagawa  
36  
37  
38 Clinic.  
39

40  
41  
42 Correspondence to Kazuo Shigematsu, MD

43  
44 Department of Neurology, the National Hospital Organization, Minami Kyoto Hospital

45  
46  
47 11 Nakaashihara, Jouyou-shi, Kyoto, Japan, 610-0113

48  
49 Phone 81-774-52-0065, Fax 81-774-55-2765, E-mail neuron.k07@gmail.com  
50  
51

1  
2  
3  
4  
5  
6  
7  
8  
9 **Keywords:** epidemiology, public health, stroke medicine

10  
11 **Contributorship:** All authors ~~equally~~ contributed equally to this study

12  
13  
14 **Funding:** none

15  
16  
17 **Competing interests:** none

## Article Summary

### Article focus

We examined the characteristics, risk factors and outcome of contemporary stroke patients based on the Kyoto Stroke Registry for recent 11 years. The study cohort has 12,774 cerebral infarction (CI), 9,232 cerebral hemorrhage (CH) and 2,540 subarachnoid hemorrhage (SAH) patients.

### Key messages

About two thirds of the patients have a history of hypertension ~~history~~, whereas only about one fifth have histories of arrhythmia, diabetes mellitus ~~and/or~~ hyperlipemia. The prevalence of risk factors was different among stroke subtypes.

Mortality ~~on~~within 30 days after the onset ~~is~~was 5.2% in CI, 15.2% in CH and 28.4% in SAH.

Hazard ratios for death adjusted for age, sex, histories of hypertension, arrhythmia, diabetes mellitus and hyperlipemia and ~~uses~~use of tobacco and ~~or~~ alcohol, showed a significant ( $P < 0.001$ ) difference among CI (as reference), CH (3. ~~6671~~; 3. ~~0711~~-4. ~~3743~~) and SAH (8. ~~91~~; 2. ~~1895~~; 7. ~~21~~-11. ~~0611~~).

### Strengths and limitations of this study

This study provided quantitative data on the fundamentals of contemporary stroke in a very large cohort in Kyoto Prefecture, Japan.

Detailed information on the size and localization of the stroke and on treatment and ~~complication~~complications was not available in this population based study.

1  
2  
3  
4  
5  
6  
7  
8  
9 **Objectives:** The aim of the study ~~is~~was to evaluate characteristics, risk factors and  
10  
11 outcome of recent stroke patients in Kyoto Japan.  
12

13  
14 **Design:** We analyzed stroke patients in the registry with regard to their characteristics,  
15  
16 risk factors, and mortality. ~~The~~ Cox proportional hazards regression was used to  
17  
18 calculate adjusted hazard ratios for death.  
19  
20  
21  
22  
23

24  
25 **Settings:** The Kyoto prefecture of Japan has established a registry to enroll new stroke  
26  
27 patients in cooperation with the Kyoto Medical Association and its affiliated hospitals  
28  
29  
30  
31

32  
33 **Participants:** The registry now has data on 14,268 patients enrolled from January 1,  
34  
35 1999 to December 31, 2009. Of these, 12,774 (89.5%), ~~9,232~~ underwent CT, 9,232  
36  
37 (64.7%), ~~2,504 (17.5%), and 342 (2.4%)~~ MRI, 2,504 (17.5%), ~~and 342 (2.4%)~~ angiography,  
38  
39 and 342 (2.4%) scintigraphy. Excluding 480 (3.3%) unclassified patients, 13,788  
40  
41 (96.6%) patients formed the basis of further analyses divided then into three subtypes ~~of~~  
42  
43 ~~stroke:~~ cerebral infarction (CI), cerebral hemorrhage (CH), and subarachnoid  
44  
45 hemorrhage (SAH).  
46  
47  
48  
49  
50  
51  
52  
53  
54  
55  
56  
57  
58  
59  
60

1  
2  
3  
4  
5  
6  
7  
8  
9 **Results:** A total of 13,788 confirmed stroke patients in the study cohort comprised  
10  
11 9,011 (86.3%) CI, 3,549 (25.7%) CH and 1,197 (8.7%) SAH cases. The mean age  $\pm$   
12  
13 SD was  $73.3 \pm 11.8$ ,  $69.1 \pm 13.6$  and  $62.7 \pm 13.5$  in the CI, CH and SAH cases,  
14  
15 respectively. ~~Males were predominant in~~ the CI and CH cases, ~~males were~~  
16  
17 ~~predominant~~, whereas ~~in the SAH cases~~, females were predominant. ~~Frequencies in the~~  
18  
19 ~~SAH cases. The frequencies~~ of risk factors were different among the subtypes. Mortality  
20  
21 was worst in ~~the~~ SAH, followed by ~~the~~ CH, and least in ~~the~~ CI. Hazard ratios for death  
22  
23 adjusted for age, sex, histories of hypertension, arrhythmia, diabetes mellitus and  
24  
25 hyperlipemia and ~~uses~~ use of tobacco and/or alcohol, showed a significant ( $P < 0.001$ )  
26  
27 difference among CI (~~was~~ reference), CH (~~3.6671~~; ~~3.0711~~-~~4.3743~~) and SAH (~~8.91~~;  
28  
29 ~~27.1894~~; ~~7.21~~-~~11.0611~~).

30  
31  
32  
33  
34  
35  
36  
37  
38  
39  
40 **Conclusions:** ~~Characteristics~~ The characteristics, risk factors, and mortality were  
41  
42 evaluated in a quantitative manner in a large Japanese study cohort to shed light on the  
43  
44 present status of stroke medicine.  
45  
46  
47  
48  
49  
50  
51  
52  
53  
54

## Introduction

Stroke, the third major cause of death, ~~constitutes~~is the largest cause of acquired disability in Japan [1]. According to a report of the Ministry of Health, Labor and Welfare, about 123,400 people died from stroke in 2010. About 10.3% of ~~the~~ ~~total~~all national ~~death~~deaths resulted from stroke. ~~Sustained exposure to risk factors associated with lifestyle which patients live in play an important role in stroke incidence.~~

Stroke is regarded as one of the diseases developed by long lasting exposure to risk factors associated with lifestyle. The incidence, as well as mortality, should be greatly affected by society, regions and times [2 3]. ~~The updated~~Updated detailed information on stroke events ~~in each society~~ is required. A long-term surveillance of stroke, comparing characteristics, risk factors, and mortality, based on the entire population in a prefecture as large as Kyoto, which has about 2,630,000 residents, should provide a fundamental database ~~offor~~ stroke. Stroke consists of three major distinct subtypes; namely, cerebral infarction (CI), cerebral hemorrhage (CH), and subarachnoid hemorrhage (SAH). Although these subtypes, ~~as disorders of the cerebral arteries,~~ have many things in common, distinct characteristics prevail. Quantitative measurement of these differences in the same large cohort should help characterize the three stroke

1  
2  
3  
4  
5  
6  
7  
8  
9 subtypes [4]. The strength of comparing these three stroke subtypes in the same large  
10 cohort is that, by doing so, we can evaluate the relative ~~strength~~influence of the risk  
11 factors ~~influencing~~on each subtype. These data may also ~~should~~ help ~~confirm a higher~~  
12 ~~mortality rate in hemorrhagic stroke than ischemic stroke, and to~~ elucidate hazard ratios  
13 for death ~~estimated simultaneously~~ among major stroke subtypes, ~~which should reflect~~  
14 ~~relative severities of stroke.~~

15  
16  
17  
18  
19  
20  
21  
22  
23  
24  
25  
26  
27  
28 The Kyoto prefecture of Japan has established a registry to enroll all new  
29 stroke patients in cooperation with the Kyoto Medical Association and its affiliated  
30 hospitals, with help from the data collecting agency known as the Kyoto Stroke Registry  
31 (KSR) [5]. We studied all patients registered during the past 11 years in the prefecture of  
32 Kyoto to document characteristics, risk factors, and hazard ratios in the three major  
33 stroke subtypes.

## 34 35 36 37 38 39 40 41 42 43 44 45 **Methods**

46  
47  
48  
49  
50 We analyzed all stroke patients identified from January 1999 to December  
51 2009 in the entire Kyoto prefecture and registered in the KSR run by the local



1  
2  
3  
4  
5  
6  
7  
8  
9 government of Kyoto prefecture. The Kyoto Medical Association distributed the  
10  
11 registration forms to the affiliated medical institutions and collected the data. A total of  
12  
13  
14 151 hospitals have registered patients.

15  
16  
17  
18  
19 We ~~supplied the~~ supply a summary of ~~Kyoto Stroke Registry~~ the KSR Program in  
20  
21 supplementary Table 1 A. This summary has been distributed to all hospitals affiliated  
22  
23  
24 ~~to~~ with the Kyoto Medical Association and to public health centers in the Kyoto  
25  
26  
27 Prefecture. It is also attached to the annual reports published by the Kyoto Prefecture.  
28  
29  
30  
31

32 The diagnosis of stroke was confirmed by local neurologists and/or neurosurgeons  
33  
34 based on the WHO definition [6]. Stroke patients who lived in the Kyoto prefecture  
35  
36 were registered regardless ~~to~~ of their age and sex. Conditions such as shock,  
37  
38  
39 Adam-Strokes ~~Syndromes~~ syndrome or hypertensive encephalopathy are excluded, as  
40  
41 they are not caused directly by cerebrovascular events. Transient ischemic attack (TIA)  
42  
43  
44 is also excluded as the symptoms cease within 24 hours after onset. Differential  
45  
46  
47 diagnoses ~~are~~ were made by the attending physicians, based on CT/MRI images and  
48  
49 other clinical examinations. Inclusion and exclusion criteria for the KSR ~~were~~ are shown  
50  
51  
52 in supplementary Table 1B.  
53  
54

1  
2  
3  
4  
5  
6  
7  
8  
9  
10  
11 We classified the patients into CI (ICD-9 code 433 and 434, ICD-10 code I63), CH  
12 (ICD-9 code 431, ICD-10 code I61), SAH (ICD-9 code 430, ICD-10 code I60) [7 8] and  
13  
14 others by neurological examination and the findings of CT scans, MRI scans,  
15  
16 angiographies, and scintigraphies. In order to clarify trends over time, we also divided  
17  
18 the study cohort into two groups, Group-A and Group-B, according to the date of onset  
19  
20 of the event. Group-A comprises patients who developed ~~stroke~~strokes between January  
21  
22 1999 and June 2004, and Group-B comprises patients who developed ~~stroke~~strokes  
23  
24 between July 2004 and December 2009. We showed differences between the two groups  
25  
26 and, using multivariate analyses, calculated hazard ratios for death comparing the two  
27  
28 groups.  
29  
30  
31  
32  
33  
34  
35  
36  
37  
38  
39

40 Each registry recorded age, sex, date of stroke onset, blood pressure and arrhythmia on  
41  
42 arrival, history of hypertension, arrhythmia, diabetes mellitus and hyperlipemia, tobacco  
43  
44 and alcohol use, type of paresis, consciousness levels and clinical outcome 30 days after  
45  
46 the onset.  
47  
48

49 For the purpose of this entry, we used the following definitions.  
50  
51  
52  
53  
54

- 1  
2  
3  
4  
5  
6  
7  
8  
9 1) Systolic and diastolic hypertension: blood pressure ~~exceeding~~ is 140 and 90 mmHg  
10  
11 or higher,  
12  
13  
14 2) Arrhythmia: any types of irregularity,  
15  
16 ~~3) Diabetes mellitus: both type 1 and type 2 based on the patient medical record;~~  
17  
18 3) Diabetes mellitus: fasting plasma glucose is 126mg/dl or higher, and/or plasma  
19  
20 glucose 2 hours after 75g glucose load is 200 mg/dl or higher [9].  
21  
22  
23  
24 4) Hyperlipemia: serum cholesterol level ~~of~~ is 220 mg/dl or higher and/or triglyceride  
25  
26 ~~exceeding~~ is 150mg/dl or higher,  
27  
28  
29 5) Smoking: ~~was~~ is divided into four categories: ~~non-smokers~~, and former smokers for  
30  
31 more than a year, light smokers with 20 or less cigarettes a day and heavy smokers  
32  
33 with more than 20 cigarettes a day;  
34  
35  
36  
37 6) Alcohol consumption: ~~was~~ is divided into three categories: ~~non-drinkers~~, occasional  
38  
39 drinkers (less than three time a week), and daily drinkers (more than four times a  
40  
41 week);  
42  
43  
44  
45 7) Paresis: any distribution, including unilateral or bilateral effect on limb or face,  
46  
47  
48 8) Consciousness levels ~~onset~~ based on the Japan Coma Scale (JCS) [910] [1011], the  
49  
50 most widely used Japanese scale which is composed of ~~the~~ four levels;  
51  
52 1; JSC 0 (alert),  
53  
54  
55  
56  
57  
58  
59  
60

Field Code Changed

Field Code Changed

Field Code Changed

Field Code Changed

1  
2  
3  
4  
5  
6  
7  
8  
9 2; JCS 1-digit code (disoriented but awake),

10  
11 3; JCS 2-digit code (arousable with stimulation),

12  
13  
14 4; JCS 3-digit code (unarousable)

15  
16  
17  
18  
19 ***Statistical Analysis***

20  
21  
22  
23  
24 Statistical analyses used ~~include~~included Fisher exact tests for frequencies of  
25  
26 listed characteristics among the three stroke types, Student-t test for such numerical  
27  
28 variables as age and systolic- and diastolic-blood pressures, ~~and~~ a log-rank test for  
29  
30 Kaplan-Meier curves of estimated survival. The Mantel-Haenszel method and a logistic  
31  
32 regression model were used to estimate univariate and multivariate odds ratios. Cox  
33  
34 proportional hazards ~~regression was~~regressions were used to calculate age-, sex-,  
35  
36 ~~systolic~~histories of hypertension, arrhythmia, diabetes mellitus and ~~diastolic blood~~  
37  
38 ~~pressure~~-,hyperlipemia, and ~~consciousness levels~~use of tobacco and/or alcohol-adjusted  
39  
40  
41  
42  
43 hazard ratios and their 95% confidence intervals for the risk of death. Analyses were  
44  
45 performed using SPSS ver.19 and statistical significance was set at  $p<0.05$ . All reported  
46  
47  
48  
49  
50 p values are 2-sided.

### *Ethics Statement*

This research was performed in accordance with the ethical principles for medical research involving human subjects outlined in the Declaration of Helsinki. This research was approved by the Board of Directors, the Kyoto Medical Association, the Department of Health and Welfare, Kyoto Prefecture and Ethics Committee of the National Hospital Organization, Minami Kyoto Hospital. Since all identifying personal information was stripped from the secondary files before analysis, the boards waived the requirement for written informed consent from the patients involved.

### **Results**

We reviewed 14,268 stroke patients newly identified in Kyoto prefecture from January 1999 to December 2009. Of these 12,774 (89.5%), ~~9,232 (64.7%), 2,504 (17.5%), and 342 (2.4%)~~ underwent CT, 9,232 (64.7%) an MRI scan, 2,504 (17.5%) angiography, and 342 (2.4%) scintigraphy for blood flow. Excluding 480 (3.3%) unclassified patients, ~~13,788 (96.6%) patients formed the basis of further analyses—dividing then into three subtypes of stroke, CI, CH, and SAH categories.—~~

Formatted: Indent: First line: 0.58"

The study cohort had 13,788 patients divided into 9,011 (65.4%) CI, 3,549 (25.7%) CH and 1,197 (8.7%) SAH cases. A small number of patients had a combination of stroke types as follows: 12 with CI and CH, 4 with CI and SAH, and 15 with CH and SAH. They were omitted. Table 1 summarizes the characteristics, risk factors, symptoms, and mortality rate.

Table 1 Characteristics of Stroke Patients (n=13,788)

|                                           | <b>Overall</b>     | <b>Cerebral<br/>infarction</b> | <b>Cerebral<br/>hemorrhage</b> | <b>Subarachnoid<br/>hemorrhage</b> |
|-------------------------------------------|--------------------|--------------------------------|--------------------------------|------------------------------------|
|                                           |                    | <b>n=9,011</b>                 | <b>n=3,549</b>                 | <b>n=1,197</b>                     |
|                                           |                    | <b>(65.4%)</b>                 | <b>(25.7%)</b>                 | <b>(8.7%)</b>                      |
| <b>Age (mean± SD)</b>                     | 71.3 (12.9)        | 73.3<br>(11.8) <sup>*1*3</sup> | 69.1 (13.6)<br>*1*2            | 62.7 (13.5) <sup>*2*3</sup>        |
| <b>Sex, % female</b>                      | 45.2 (6,233:7,555) | 42.3 <sup>*1*3</sup>           | 45.9 <sup>*1*2</sup>           | 64.6 <sup>*2*3</sup>               |
| <b>(n=female:<br/>male)</b>               |                    | (3,815:5,196)                  | (1,630:1,919)                  | (773:424)                          |
| <b>Systolic blood<br/>pressure (mean±</b> | 161.3 (35.5)       | 157.5<br>(28.3) <sup>*1</sup>  | 172.1 (34.8)<br>*1*2           | 157.9 (37.0) <sup>*2</sup>         |

|                        |                    |                      |                      |                             |
|------------------------|--------------------|----------------------|----------------------|-----------------------------|
| SD), mmHg              |                    |                      |                      |                             |
| <b>Diastolic blood</b> | 87.6 (18.63)       | 85.6 (17.0)          | 93.1 (21.1)          | 86.8 (21.8) <sup>*2*3</sup> |
| <b>pressure (mean±</b> |                    | *1*3                 | *1*2                 |                             |
| SD), mmHg              |                    |                      |                      |                             |
| <b>Hypertension</b>    | 62.6 (8,005:4,780) | 62.0 <sup>*1*3</sup> | 68.5 <sup>*1*2</sup> | 49.9 <sup>*2*3</sup>        |
| <b>history, %</b>      |                    | (5,285:3,242)        | (2,183:1,006)        | (520:522)                   |
| <b>(n=with:</b>        |                    |                      |                      |                             |
| <b>without)</b>        |                    |                      |                      |                             |
| <b>Arrhythmia, %</b>   | 14.5               | 18.9 <sup>*1*3</sup> | 5.9 <sup>*1*2</sup>  | 7.2 <sup>*2*3</sup>         |
| <b>(n=with:</b>        | (1,932:11,352)     | (1,647:7,064)        | (200:3,209)          | (82:1,052)                  |
| <b>without)</b>        |                    |                      |                      |                             |
| <b>Arrhythmia</b>      | 18.5(2,357:10,415) | 24.3 <sup>*1*3</sup> | 7.5 <sup>*1*2</sup>  | 5.3 <sup>*2*3</sup>         |
| <b>history, %</b>      |                    | (2,060:6,432)        | (240:2,971)          | (55:985)                    |
| <b>(n=with:</b>        |                    |                      |                      |                             |
| <b>without)</b>        |                    |                      |                      |                             |
| <b>Diabetes</b>        | 20.9               | 24.8 <sup>*1*3</sup> | 14.8 <sup>*1*2</sup> | 6.9 <sup>*2*3</sup>         |
| <b>mellitus</b>        | (2,689:10,198)     | (2,138:6,475)        | (474:2,738)          | (71:963)                    |
| <b>history, %</b>      |                    |                      |                      |                             |

|                        |                    |                              |                            |                            |
|------------------------|--------------------|------------------------------|----------------------------|----------------------------|
| <b>(n=with:</b>        |                    |                              |                            |                            |
| <b>without)</b>        |                    |                              |                            |                            |
| <b>Hyperlipemia</b>    | 19.2               | 23.1 <sup>*1*3</sup>         | 11.9 <sup>*1*2</sup>       | 9.2 <sup>*2*3</sup>        |
| <b>history, %</b>      | (2,419:10,198)     | (1,951:6,503)                | (371:2,755)                | (93:918)                   |
| <b>(n=with:</b>        |                    |                              |                            |                            |
| <b>without)</b>        |                    |                              |                            |                            |
| <b>Tobacco use, %</b>  | 32.4 (3,665:7,642) | 32.6 <sup>*1*3</sup>         | 30.1 <sup>*1*2</sup>       | 37.1 <sup>*2*3</sup>       |
| <b>(n=with:</b>        |                    | (2,455:5,077)                | (843:1,956)                | (354:599)                  |
| <b>without)</b>        |                    |                              |                            |                            |
| <b>Non smoker, %</b>   | 67.6 (7,642)       | 67.4 (5,077) <sup>*3</sup>   | 69.9 (1,956) <sup>*2</sup> | 62.9 (599) <sup>*2*3</sup> |
| <b>(n)</b>             |                    |                              |                            |                            |
| <b>Former</b>          | 5.4 (615)          | 5.8 (435) <sup>*3</sup>      | 5.7 (159) <sup>*2</sup>    | 2.1 (20) <sup>*2*3</sup>   |
| <b>smoker, % (n)</b>   |                    |                              |                            |                            |
| <b>Light smoker, %</b> | 17.0 (1,918)       | 17.0 (1,281) <sup>*1*3</sup> | 14.6 (409) <sup>*1*2</sup> | 23.3 (222) <sup>*2*3</sup> |
| <b>(n)</b>             |                    |                              |                            |                            |
| <b>Heavy smoker, %</b> | 10.0 (1,132)       | 9.8 (739)                    | 9.8 (275)                  | 11.8 (112)                 |
| <b>(n)</b>             |                    |                              |                            |                            |
| <b>Alcohol use, %</b>  | 38.0 (4,202/6,851) | 36.3 <sup>*1*3</sup>         | 40.5 <sup>*1*2</sup>       | 43.6 <sup>*2*3</sup>       |



|                       |                     |                              |                              |                            |
|-----------------------|---------------------|------------------------------|------------------------------|----------------------------|
|                       |                     | (2,654:4,655)                | (1,124:1,650)                | (412:533)                  |
| <b>(n=with:</b>       |                     |                              |                              |                            |
| <b>without)</b>       |                     |                              |                              |                            |
| <b>Non drinker, %</b> | 62.0 (6,851)        | 63.7 (4,655) <sup>*1*3</sup> | 59.5 (1,650) <sup>*1</sup>   | 56.4 (533) <sup>*3</sup>   |
| <b>(n)</b>            |                     |                              |                              |                            |
| <b>Occasional</b>     | 15.3 (1,692)        | 15.5 (1,131) <sup>*1*3</sup> | 13.5 (374) <sup>*1*2</sup>   | 18.9 (179) <sup>*2*3</sup> |
| <b>drinker, % (n)</b> |                     |                              |                              |                            |
| <b>Every day</b>      | 22.7 (2,510)        | 20.8 (1,523) <sup>*1*3</sup> | 27.0 (750) <sup>*1</sup>     | 24.7 (233) <sup>*3</sup>   |
| <b>drinker, % (n)</b> |                     |                              |                              |                            |
| <b>Paresis, %</b>     | 73.3 (9,670:3,525)  | 76.8 <sup>*1*3</sup>         | 78.5 <sup>*1*2</sup>         | 26.8 <sup>*2*3</sup>       |
| <b>(n=with:</b>       |                     | (6,750:2,041)                | (2,624:717)                  | (277:756)                  |
| <b>without)</b>       |                     |                              |                              |                            |
| <b>Consciousness</b>  | 43.5 (5,914: 7,676) | 31.8 <sup>*1*3</sup>         | 65.7 <sup>*1</sup> (2,305:   | 65.1 <sup>*3</sup> (775:   |
| <b>disturbance, %</b> |                     | (2,815:                      | 1,201)                       | 415)                       |
| <b>(n=with:</b>       |                     | 8,863)                       |                              |                            |
| <b>without)</b>       |                     |                              |                              |                            |
| <b>JCS 0, % (n)</b>   | 55.7 (7,676)        | 67.1 <sup>*1*3</sup> (6,048) | 33.8 <sup>*1*2</sup> (1,201) | 35.6 <sup>*2*3</sup> (415) |
| <b>JSC 1-digit</b>    | 19.0 (2,619)        | 16.7 <sup>*1</sup> (1,508)   | 26.0 <sup>*1*2</sup> (921)   | 15.9 <sup>*2</sup> (185)   |
| <b>code, % (n)</b>    |                     |                              |                              |                            |

|                          |                     |                           |                            |                            |
|--------------------------|---------------------|---------------------------|----------------------------|----------------------------|
| <b>JSC 2-digit</b>       | 11.6 (1,602)        | 8.6 <sup>*1*3</sup> (774) | 17.5 <sup>*1</sup> (622)   | 16.7 <sup>*3</sup> (200)   |
| <b>code, % (n)</b>       |                     |                           |                            |                            |
| <b>JSC 3-digit</b>       | 10.9 (1,509)        | 4.7 <sup>*1*3</sup> (421) | 20.2 <sup>*1*2</sup> (716) | 30.5 <sup>*2*3</sup> (365) |
| <b>code, % (n)</b>       |                     |                           |                            |                            |
| <b>JSC</b>               | 1.3 (184)           | 1.2 <sup>*3</sup> (112)   | 1.3 <sup>*2</sup> (46)     | 2.1 <sup>*2*3</sup> (25)   |
| <b>undetermined, %</b>   |                     |                           |                            |                            |
| <b>(n)</b>               |                     |                           |                            |                            |
| <b>Delay time</b>        | 3.91±4.82           | 4.20±5.21                 | 3.50±4.13                  | 3.13±3.77                  |
| <b>(mean± SD)</b>        |                     |                           |                            |                            |
| <b>CT, % (n)</b>         | 89.7 (12,365)       | 85.1 (7,668)              | 98.2 (3,485) <sup>*1</sup> | 98.8 (1,183) <sup>*3</sup> |
|                          |                     | *1*3                      |                            |                            |
| <b>MRI, % (n)</b>        | 64.5 (8,891)        | 79.8 (7,148)              | 40.3 (1,429)               | 25.1 (300) <sup>*1*3</sup> |
|                          |                     | *1*3                      | *1*2                       |                            |
| <b>Surgery %</b>         | 16.0 (2,171:11,399) | 4.2                       | 26.1                       | 74.6 (871:297)             |
| <b>(n=with: without)</b> |                     | (374:8,495)               | (915:2,588)                | *1*3                       |
|                          |                     | *1*3                      | *1*2                       |                            |
| <b>Mortality, %</b>      | 9.8 (1,344:12,391)  | 5.2 <sup>*1*3</sup>       | 15.2 <sup>*1*2</sup>       | 28.4 <sup>*2*3</sup>       |
| <b>(n=dead: alive)</b>   |                     | (467:8,981)               | (536:2,997)                | (338:853)                  |

When the numbers entered in the table above are significantly different between different types of strokes, they are marked as follows:

\*1: significant difference between cerebral infarction and cerebral hemorrhage;

\*2: sig-significant difference between cerebral hemorrhage and subarachnoid hemorrhage;

\*3: sig-significant difference between subarachnoid hemorrhage and cerebral infarction;

SD = Standard Deviation

Temporal trends of characteristics of stroke patients, comparing Group-A and Group-B, are summarized in Table 2 and hazard ratios for death, comparing the two groups are summarized in Table 3. Characteristics~~The characteristics~~ of stroke patients in Group-A and Group-B are summarized in supplementary Table 3.

Formatted: Indent: First line: 0.58"

Table 2 Temporal trends of characteristics of stroke patients, comparing Group-A and Group-B

|                       | Group-A   | Group-B   | P      | Difference/OR          |
|-----------------------|-----------|-----------|--------|------------------------|
| <b>Age (mean± SD)</b> | 70.5±12.7 | 72.3±13.0 | <0.001 | -1.85<br>(-2.28~-1.41) |

|                        |               |               |        |                                 |
|------------------------|---------------|---------------|--------|---------------------------------|
|                        |               |               |        | * <sup>1</sup>                  |
| <b>Sex, % female</b>   | 44.8          | 45.7          | 0.505  | 1.02                            |
| <b>(n=female:</b>      | (3,531:4,349) | (2,702:3,206) |        | (0.96~1.09)* <sup>2</sup>       |
| <b>male)</b>           |               |               |        |                                 |
| <b>Systolic blood</b>  | 161.5±31.6    | 161±31.5      | 0.449  | 0.41                            |
| <b>pressure (mean±</b> |               |               |        | (-0.66~1.49)* <sup>1</sup>      |
| <b>SD), mmHg</b>       |               |               |        |                                 |
| <b>Diastolic blood</b> | 87.3±18.7     | 88.0±19.0     | 0.036  | -0.69                           |
| <b>pressure (mean±</b> |               |               |        | (-1.33~-0.05)* <sup>1</sup>     |
| <b>SD), mmHg</b>       |               |               |        |                                 |
| <b>Hypertension</b>    | 60.2          | 65.9          | <0.001 | <u>1.27</u>                     |
| <b>history, %</b>      | (4,379:2,900) | (3,626:1,880) |        | <u>(1.19~1.38)*<sup>2</sup></u> |
| <b>(n=with:</b>        |               |               |        |                                 |
| <b>without)</b>        |               |               |        |                                 |
| <b>Arrhythmia, %</b>   | 14.9          | 14.0          | 0.079  | 0.92                            |
| <b>(n=with:</b>        | (1,132:6,446) | (800:4,906)   |        | (0.83~1.01) * <sup>2</sup>      |
| <b>without)</b>        |               |               |        |                                 |
| <b>Arrhythmia</b>      | 19.0 (74.7)   | 17.7          | 0.059  | 0.92                            |

|    |                       |               |               |        |                            |
|----|-----------------------|---------------|---------------|--------|----------------------------|
| 1  |                       |               |               |        |                            |
| 2  |                       |               |               |        |                            |
| 3  |                       |               |               |        |                            |
| 4  |                       |               |               |        |                            |
| 5  |                       |               |               |        |                            |
| 6  |                       |               |               |        |                            |
| 7  |                       |               |               |        |                            |
| 8  |                       |               |               |        |                            |
| 9  | <b>history, %</b>     |               | (974:4,531)   |        | (0.84~1.00) * <sup>2</sup> |
| 10 |                       |               |               |        |                            |
| 11 | <b>(n=with:</b>       |               |               |        |                            |
| 12 |                       |               |               |        |                            |
| 13 | <b>without)</b>       |               |               |        |                            |
| 14 |                       |               |               |        |                            |
| 15 |                       |               |               |        |                            |
| 16 | <b>Diabetes</b>       | 20.5          | 21.4          | 0.327  | 1.04                       |
| 17 |                       |               |               |        |                            |
| 18 |                       |               |               |        |                            |
| 19 | <b>mellitus</b>       | (1,500:5,827) | (1,189:4,371) |        | (0.96~1.14) * <sup>2</sup> |
| 20 |                       |               |               |        |                            |
| 21 |                       |               |               |        |                            |
| 22 | <b>history, %</b>     |               |               |        |                            |
| 23 |                       |               |               |        |                            |
| 24 | <b>(n=with:</b>       |               |               |        |                            |
| 25 |                       |               |               |        |                            |
| 26 | <b>without)</b>       |               |               |        |                            |
| 27 |                       |               |               |        |                            |
| 28 |                       |               |               |        |                            |
| 29 | <b>Hyperlipemia</b>   | 17.5          | 21.4          | <0.001 | 1.27                       |
| 30 |                       |               |               |        |                            |
| 31 |                       |               |               |        |                            |
| 32 | <b>history, %</b>     | (1,250:5,910) | (1,169:4,288) |        | (1.16~1.39) * <sup>2</sup> |
| 33 |                       |               |               |        |                            |
| 34 | <b>(n=with:</b>       |               |               |        |                            |
| 35 |                       |               |               |        |                            |
| 36 | <b>without)</b>       |               |               |        |                            |
| 37 |                       |               |               |        |                            |
| 38 |                       |               |               |        |                            |
| 39 | <b>Tobacco use, %</b> | 33.6          | 30.9          | 0.001  | 0.88                       |
| 40 |                       |               |               |        |                            |
| 41 |                       |               |               |        |                            |
| 42 | <b>(n=with:</b>       | (2,152:4,259) | (1,513:3,383) |        | (0.81~0.95) * <sup>2</sup> |
| 43 |                       |               |               |        |                            |
| 44 | <b>without)</b>       |               |               |        |                            |
| 45 |                       |               |               |        |                            |
| 46 |                       |               |               |        |                            |
| 47 | <b>Alcohol use, %</b> | 39.5          | 36.1 (1,724)  | 0.002  | 0.89                       |
| 48 |                       |               |               |        |                            |
| 49 |                       |               |               |        |                            |
| 50 | <b>(n=with:</b>       | (2,478:3,797) |               |        | (0.82~0.96) * <sup>2</sup> |
| 51 |                       |               |               |        |                            |
| 52 | <b>without)</b>       |               |               |        |                            |
| 53 |                       |               |               |        |                            |
| 54 |                       |               |               |        |                            |

|                        |                 |               |        |                             |
|------------------------|-----------------|---------------|--------|-----------------------------|
| <b>Paresis, %</b>      | 73.7            | 72.7          | 0.116  | 0.94                        |
| <b>(n=with:</b>        | (5,581:1,987)   | (4,087:1,534) |        | (0.87~1.02)* <sup>2</sup>   |
| <b>without)</b>        |                 |               |        |                             |
| <b>Consciousness</b>   | 42.4            | 45.0          | 0.055  | 1.07                        |
| <b>disturbance, %</b>  | (3,290:4,463)   | (2,624:3,207) |        | (1.00~1.14) * <sup>2</sup>  |
| <b>(n=with:</b>        |                 |               |        |                             |
| <b>without)</b>        |                 |               |        |                             |
| <b>Delay time</b>      | 4.15±5.03       | 3.60±4.54     | <0.001 | -0.55                       |
| <b>(mean± SD)</b>      |                 |               |        | (-0.73~-0.38)* <sup>1</sup> |
| <b>CT, % (n)</b>       | 92.4 (7,285)    | 86.1 (5,080)  | <0.001 | 0.51                        |
|                        |                 |               |        | (0.45~0.57) * <sup>2</sup>  |
| <b>MRI, % (n)</b>      | 59.4 (4,682)    | 71.3 (4,209)  | <0.001 | 1.68                        |
|                        |                 |               |        | (1.56~1.80) * <sup>2</sup>  |
| <b>Surgery %</b>       | 17.6            | 13.9          | <0.001 | 0.76                        |
| <b>(n=with:</b>        | (1,356:6,339)   | (815:5,060)   |        | (0.69~0.83) * <sup>2</sup>  |
| <b>without)</b>        |                 |               |        |                             |
| <b>Mortality, %</b>    | 9.5 (745:7,097) | 10.2          | 0.771  | 1.02                        |
| <b>(n=dead: alive)</b> |                 | (599:5,294)   |        | (0.91~1.14) * <sup>2</sup>  |

\*<sup>1</sup>Mean difference (Group-A – Group-B) with 95% confidence interval of the difference)

\*<sup>2</sup>Mantel-Haenszel common odds ratio (Group-B/Group-A) with 95% confidence interval)

OR= Odds Ratio

Table 3 Hazard Ratios for death, comparing Group-A and Group-B

|                         | Hazard Ratio<br>(Group-B/Group-A) | 95% Confidence Interval |       | p     |
|-------------------------|-----------------------------------|-------------------------|-------|-------|
|                         |                                   | Lower                   | Upper |       |
|                         |                                   | Over all                | 1.33  |       |
| Cerebral infarction     | 1.33                              | 1.04                    | 1.70  | 0.021 |
| Cerebral hemorrhage     | 1.06                              | 0.83                    | 1.34  | 0.650 |
| Subarachnoid hemorrhage | 1.25                              | 0.92                    | 1.70  | 0.147 |

Adjusted for age, sex, histories of hypertension, arrhythmia, diabetes mellitus and hyperlipemia, and ~~use~~use of tobacco and/or alcohol

Odds ratios for the prevalence of risk factors among stroke subtypes, adjusted for age and sex, were calculated using a logistic regression model and are summarized in Table 34.

Formatted: Indent: First line: 0.58"

Table 4 Odds Ratios for the prevalence of risk factors among stroke subtypes, adjusted for age and sex

|                                      | Odds Ratio | 95% Confidence Interval |       | p      |
|--------------------------------------|------------|-------------------------|-------|--------|
|                                      |            | Lower                   | Upper |        |
| <b>History of hypertension</b>       |            |                         |       |        |
| <b>Cerebral infarction (CI)</b>      | Reference  |                         |       |        |
| <b>Cerebral hemorrhage (CH)</b>      | 1.36       | 1.25                    | 1.49  | <0.001 |
| <b>Subarachnoid hemorrhage (SAH)</b> | 0.65       | 0.57                    | 0.74  | <0.001 |
| <b>History of arrhythmia</b>         |            |                         |       |        |
| <b>CI</b>                            | Reference  |                         |       |        |
| <b>CH</b>                            | 0.28       | 0.24                    | 0.33  | <0.001 |
| <b>SAH</b>                           | 0.26       | 0.19                    | 0.34  | <0.001 |
| <b>History of diabetes mellitus</b>  |            |                         |       |        |



|                                |           |      |      |        |
|--------------------------------|-----------|------|------|--------|
| CI                             | Reference |      |      |        |
| CH                             | 0.49      | 0.44 | 0.55 | <0.001 |
| SAH                            | 0.20      | 0.16 | 0.26 | <0.001 |
| <b>History of hyperlipemia</b> |           |      |      |        |
| CI                             | Reference |      |      |        |
| CH                             | 0.40      | 0.35 | 0.45 | <0.001 |
| SAH                            | 0.24      | 0.19 | 0.30 | <0.001 |

Table 1 also shows ~~historical account on a history of~~ hypertension in 12,785 (92.7%), arrhythmia in 12,772 (92.6%), diabetes mellitus in 12,887 (93.5%), hyperlipemia in 12,617 (91.5%), tobacco usage in 11,307 (82.0%), alcohol usage in 11,053 (80.2%), and paresis in 13,195 (96.7%). We were able to classify 13,406 (97.2%) patients into four consciousness levels, excluding 184 (1.3%) patients with uncategorized stroke and 580 (4.2%) patients with no reliable information on ~~consciousness~~ levels. Calculation of the mean delay time excluded ~~49644,964~~ (36.0%) patients ~~of with~~ unknown onset. Patients received primary medical care within 3 hours of ~~Onset~~ in 54.3% of ~~CH in CI~~, 68.5% ~~in of~~ CH, and ~~76.4%~~ of SAH ~~in 76.4%~~.

Formatted: Indent: First line: 0.58"

Of 13,788 patients, 13,735 (99.6%) had a confirmed record of survival or death 30 days after stroke onset. A total of 1,344 (9.8%) patients died within this time period.

Figure 1 shows Kaplan-Meier Survival curves, comparing stroke subtypes, ~~showing and reveals~~ a significant difference ( $p < 0.001$ ) between any two subtypes ~~based on Log by the log-rank test test~~.

Compared to CI, CH and SAH hazard ratios for fatality ~~of were~~ 3.66 (3.07-4.37,  $p < 0.001$ ), and 8.91 (7.18-11.06,  $p < 0.001$ ), when adjusted for age, sex, histories of hypertension, arrhythmia, diabetes mellitus and hyperlipemia and ~~uses use~~ of tobacco and ~~or~~ alcohol, ~~showing significant differences ( $p < 0.001$ )~~ (Table 5).

Table 5 Hazard ratios for death, comparing stroke subtypes

|                                | HR                         | 95% Confidence Interval    |                             | p      |
|--------------------------------|----------------------------|----------------------------|-----------------------------|--------|
|                                |                            | Lower                      | Upper                       |        |
| <b>Cerebral infarction</b>     | Reference                  |                            |                             |        |
| <b>Cerebral hemorrhage</b>     | 3. <del>66</del> <u>71</u> | 3. <del>07</del> <u>11</u> | 4. <del>37</del> <u>43</u>  | <0.001 |
| <b>Subarachnoid hemorrhage</b> | 8. <del>91</del> <u>95</u> | 7. <del>18</del> <u>21</u> | 11. <del>06</del> <u>11</u> | <0.001 |

1  
2  
3  
4  
5  
6  
7  
8  
9 Adjusted for age, sex, histories of hypertension, arrhythmia, diabetes mellitus and  
10  
11 hyperlipemia, and ~~usesuse~~ of tobacco and ~~or~~ alcohol  
12  
13

14  
15  
16 Hazard ratios for death, comparing stroke subtypes, in Group-A and Group-B  
17  
18  
19 are summarized in Supplementary Table 4 A and B.  
20  
21  
22  
23  
24  
25  
26

Formatted: Indent: First line: 0.58"

## 27 Discussion

28  
29  
30  
31

32 The study summarized the stroke registry covering ~~the~~ entire prefecture for 11  
33  
34 years. ~~Such data set depends on the society and the times.~~ Hospitals affiliated to the  
35  
36 Kyoto Medical Association registered new stroke patients based on ~~the~~ inclusion and  
37  
38 exclusion criteria in accordance with the Kyoto municipal ordinance, avoiding area or  
39  
40 ~~hospitalshospital~~ preferences.  
41  
42  
43  
44  
45

46  
47 One of the major purposes of these prefectural stroke registries is to clarify the  
48  
49 current situation ~~of~~ ~~concerning~~ stroke events in order to maintain and improve health  
50  
51 care ~~system in the prefecture.~~ In Japan, health care systems largely depend on ~~each~~ ~~the~~  
52  
53  
54  
55  
56  
57  
58  
59  
60

Formatted: Indent: First line: 0.58"

1  
2  
3  
4  
5  
6  
7  
8  
9 prefectural ~~government~~governments, and ~~therefore~~ information on each prefecture is  
10  
11 ~~therefore~~ important. Japan has 47 prefectures. ~~To our knowledge, there~~ There are five  
12  
13 stroke registries based on ~~a population~~populations in the entire ~~prefecture in recent~~  
14  
15 ~~years; prefectures: the~~ Akita Stroke Registry (ASR) [~~11-14~~12-15], ~~the~~ Iwate Stroke  
16  
17 Registry (ISR) [~~15~~16], ~~the~~ Tochigi Stroke Registry (TSR) [~~16~~17, 1718], ~~the~~  
18  
19 Miyazaki Stroke Registry (MSR) [~~18~~19] and ~~the~~ KSR. Although each prefectural  
20  
21 registry ~~reported~~reports the result annually to the local government, to health care  
22  
23 centers, and to the public, most ~~of them~~ are not available in scientific English literature.  
24  
25 We ~~summarized~~summarize incidence information based on ~~the~~ KSR in supplementary  
26  
27 Tables 2 A, B and C. ~~The~~ ASR has ~~been~~ published age-adjusted gender-specific  
28  
29 incidence. Although we could not find age-adjusted gender-specific incidence among  
30  
31 the other prefectural stroke registries, ~~the~~ TSR and MSR ~~have~~ reported data on ~~the~~  
32  
33 numbers of patients they registered. We calculated age-adjusted gender-specific  
34  
35 incidence in ~~the~~ TSR and MSR based on their annual ~~report~~reports and  
36  
37 ~~summarized~~summarize them in supplementary Tables 2 D, E, F, G, H and I. ~~The~~ ISR  
38  
39 says that their reports will soon be ready [~~19~~20]. All the prefectural registries ask as  
40  
41 many hospitals and facilities as possible to register all ~~the~~ stroke events ~~as possible~~.  
42  
43  
44  
45  
46  
47  
48  
49  
50  
51  
52  
53  
54  
55  
56  
57  
58  
59  
60  
Registration, however, is not mandatory but depends on ~~the~~ voluntary contributions of

Field Code Changed

1  
2  
3  
4  
5  
6  
7  
8  
9 ~~the~~ hospitals. ~~Some hospitals might be difficult to undertake this social work.~~ Therefore,  
10 registries ~~on~~for more restricted ~~area should~~areas may be ~~more suitable~~better suited to  
11 clarify stroke incidence in a community. Takashima and Hisayama are two such areas.

12  
13  
14  
15  
16  
17 The incidence rates of stroke reported from the Takashima Stroke Registry [~~20-22~~21-24]  
18 and the Hisayama Study [~~23-25~~25-27] are higher than those from the prefectural stroke  
19 registries. The Hisayama study is reported to ~~examine~~cover about 80 % ~~of the~~ residents  
20  
21  
22  
23  
24  
25  
26  
27  
28  
29  
30  
31  
32  
33  
34  
35  
36  
37  
38  
39  
40  
41  
42  
43  
44  
45  
46  
47  
48  
49  
50  
51  
52  
53  
54  
55  
56  
57  
58  
59  
60  
(~~at age of~~aged 40 or over) of the area, which has a population of about 8,400 [~~26~~28].

Age-standardized incidence rates (per 10,000 person-years) of stroke in the 3<sup>rd</sup> cohort  
(1988-2000) of the Hisayama Study are 529 in men and 388 in women [~~23~~25]. ~~Among,~~  
The incidence ratios for men: women for the subtypes of stroke, ~~they~~ are 357:77 for CI,  
130:21 for CH and 42:13 (~~men: women~~) ~~in cerebral infarction, cerebral hemorrhage and~~  
~~subarachnoid hemorrhage, respectively~~for SAH [~~23~~25].

The average annual mortality ~~of cerebral hemorrhage~~from CH is 3.9 per 1,000  
~~person-years of experience (PYE),~~ whereas that ~~of cerebral infarction~~from CI is 6.5 in  
~~the~~ Hisayama population aged 40 and over [~~11~~12]. Some prefectural stroke registries  
~~reported~~report mortality rates. In ~~the~~ TSR, they were 10%, 16% and 29% in CI, CH and  
SAH, respectively [~~16~~17]. According to ~~the~~ ASR, survival rates were 94%, 92%, 83%,

Field Code Changed

Formatted: Indent: First line: 0.58"

Field Code Changed

Field Code Changed

Field Code Changed

Field Code Changed

84%, 70% and 70% in CI-men, CI-women, CH-men, CH-women, SAH-men and

SAH-women, respectively [~~1314, 1415~~], ~~which. These figures~~ generally ~~agrees~~ agree

with the results ~~of~~ for the KSR. The present study added ~~the~~ age, sex, histories of

hypertension, arrhythmia, diabetes ~~and~~, hyperlipemia, and ~~uses~~ use of tobacco and/or

alcohol ~~as~~ adjusted hazard ratios for death in each stroke subtype.

In ~~the~~ KSR, voluntary ~~contribution mentioned above has~~ contributions have

built up a registry of 14,268 stroke patients over 11 years. ~~To be compared~~ Compared

with the other prefectural registries, one of the outstanding strengths of ~~the~~ KSR is that

it has information on survival ~~days~~ up to 30 days after the onset in 13,735 patients out

of ~~the~~ 13,788 patients ~~of~~ in this ~~study~~ cohort (99.6%). ~~KSR makes~~ These data make it

possible to analyse relationships between ~~a certain factor~~ various factors and early

mortality. ~~Strengths~~ A strength of stroke registry in Japan ~~include a high availability~~ is

~~that it includes a large amount~~ of CT and MRI ~~data~~. Japan has the most MRI units (40 U

per million population) and CT scanners (93 U per million ~~populations~~ population)

among ~~the~~ developed countries [~~2729~~]. In the study cohort, 12,365 patients (89.7%) had

~~a~~ CT examination and 8,891 patients (64.5%) had ~~a~~ MRI examination. The study added

~~the~~ information on recent trends on ~~the~~ usage of these examinations. As expected, ~~but~~

Field Code Changed

Field Code Changed

Field Code Changed

Formatted: Indent: First line: 0.58"

Field Code Changed

1  
2  
3  
4  
5  
6  
7  
8  
9 interestingly, the usage of CT declined whereas the usage of MRI increased with time  
10  
11 duringover the study period of 11 years.

12  
13  
14  
15  
16 In agreement with previous reports, CI showed higher had the highest  
17 incidence, followed by CH and SAH, which constitutes a fourth of hemorrhagic strokes  
18  
19 [2426]. The result adds data add the information that SAH constitutes about a fourth of  
20  
21 hemorrhagic strokes. AgeThe age distribution also confirm confirms the result of  
22  
23 previous reports, the oldest mean age being in CH and the youngest in SAH [2830]. The  
24  
25 elderly patients showed a greater proportional difference in proportion in stroke  
26  
27 subtypes. For example, in patients who were 71 years or older, the proportions were  
28  
29 73.1% CI (n=56165,616), 22.3% CH (n=17091,709), and 4.6% SAH (n=353), as  
30  
31 compared to the younger group who showed 55.8% (n=3,395), 30.3% (n=1,840) and  
32  
33 13.9% (n=844).

34  
35  
36  
37  
38  
39  
40  
41  
42 Most of the other characteristics also showed significant difference differences  
43  
44 among the three stroke subtypes. The overall registry had more male patients than  
45  
46 female, except that almost two-thirds of the SAH cases were female. The initial medical  
47  
48 examination revealed higher systolic and diastolic blood pressures in CH than in CI,  
49  
50 possibly reflecting an intracranial mass effect on brain edema [2931, 3032].

Field Code Changed

Field Code Changed

Field Code Changed

Field Code Changed

1  
2  
3  
4  
5  
6  
7  
8  
9 Patients with disturbed consciousness had a higher ( $p < 0.001$ ) systolic/diastolic  
10  
11 blood pressure (mean  $\pm$  SD:  $164.0 \pm 35.2/88.6 \pm 20.9$ ) than the remainder ( $159.3 \pm$   
12  
13  $28.2/87.0 \pm 17.1$ ), implying possible association between stroke severity and degree of  
14  
15 hypertension.  
16  
17

18 Risk factors for stroke include hypertension [3133], arrhythmia [3234],  
19  
20 diabetes mellitus [3335 3436], hyperlipemia [3537], alcohol use [3638 3739], and  
21  
22 tobacco use. Except for tobacco and alcohol ~~usesuse~~, these factors were noted most  
23  
24 often in CI, followed by CH, and least in SAH. Hypertension, probably plays the most  
25  
26 important role, ~~since it~~ was found in more than 60 % of all stroke patients. A history of  
27  
28 arrhythmia and diabetes mellitus, relatively high in CI and lower in CH, was rarely  
29  
30 found in SAH. These data suggest a limited association between these three factors and  
31  
32 hemorrhagic strokes. The Ministry of Health, Labour and Welfare of Japan, has  
33  
34 estimated morbidity rates of hypertension, diabetes mellitus and hyperlipemia among  
35  
36 Japanese aged from 40 to 74 as 49.9%, 11.4% and 17.7%, respectively. In our series, a  
37  
38 history of hypertension exceeded this estimate in CI and CH. A history of diabetes  
39  
40 mellitus was higher in CI and CH, but lower in SAH, suggesting that this may not be a  
41  
42 risk factor in SAH. A history of hyperlipemia was also lower in SAH than the morbidity  
43  
44 rate, also suggesting that this may not a risk factor in SAH. ~~Regarding the risk factor of~~  
45  
46  
47  
48  
49  
50  
51  
52  
53  
54

Field Code Changed



1  
2  
3  
4  
5  
6  
7  
8  
9 ~~stroke, the~~ These data may not add sufficient information on the effect of risk factors on  
10 stroke occurrence. The registry data are not meant to ~~do that type~~ correlate factors with  
11 the risk of ~~study~~stroke. The registry data, however, are appropriate to ~~present~~ determine  
12 the prevalence of different risk factors among ~~the~~ stroke patients. The higher prevalence  
13 of any factor in a certain group may ~~support the~~ indicate a higher association between  
14 ~~the~~ that factor and ~~the~~ that group. This study added information on the prevalence of  
15 various risk factors among stroke patients and clarified ~~the~~ differences among stroke  
16 subtypes. We also added multivariate analyses. Using a logistic regression model, we  
17 estimated odds ratios and 95% confidence intervals for the prevalence of these risk  
18 factors comparing each stroke subtype after ~~adjusted~~ adjusting for age and sex.

19  
20  
21  
22  
23  
24  
25  
26  
27  
28  
29  
30  
31  
32  
33  
34  
35 Alcohol and tobacco use showed a higher correlation ~~to~~ with SAH than with the  
36 other types of stroke in ~~the~~ surveillance conducted under the same conditions for the  
37 three subtypes of stroke. Alcohol and tobacco ~~usage~~ use may therefore increase the risk  
38 of SAH more than the risk of CI or CH. The proportion of heavy smokers was not  
39 different among stroke subtypes, whereas the proportion of every day drinkers was  
40 higher in hemorrhagic strokes than in ischemic stroke. Paresis developed more often in  
41 CI and CH ~~compared to~~ than in SAH. Hemorrhagic stroke caused more consciousness  
42 disturbance ~~more~~ than ischemic stroke did.

1  
2  
3  
4  
5  
6  
7  
8  
9  
10  
11  
12  
13  
14  
15  
16  
17  
18  
19  
20  
21  
22  
23  
24  
25  
26  
27  
28  
29  
30  
31  
32  
33  
34  
35  
36  
37  
38  
39  
40  
41  
42  
43  
44  
45  
46  
47  
48  
49  
50  
51  
52  
53  
54  
55  
56  
57  
58  
59  
60

The characteristics significantly different between Group-A and Group-B were age, diastolic blood pressure, histories of hypertension and hyperlipemia, tobacco and alcohol use, delay time and surgery. ~~Hazard~~The hazard ratio for death in cerebral infarction was significantly higher in Group-B than ~~that~~ in Group-A after ~~adjusted~~adjustment for age, sex, histories of risk factors and ~~uses~~use of tobacco and alcohol. Although delay time is shorter in Group-B than Group-A, there is no significant improvement in mortality.

Formatted: Font color: Custom Color(RGB (34,34,34)), Pattern: Clear (White)

We calculated mortality based on the information up to 30 days after the stroke onset, excluding those who died later. Early mortality ~~indicates~~suggests stroke ~~events-~~themselves~~effects~~, whereas long term mortality reflects aftereffects and complications. Thus, early mortality serves ~~well~~ to evaluate the severity of the three major stroke subtypes. Death in the first month after stroke mainly results from neurological causes such as brain edema<sup>[3840]</sup>, followed by complications of immobility including pneumonia <sup>[3941]</sup>.

Field Code Changed

Field Code Changed

Field Code Changed

The mortality rate of ischemic stroke and risk characteristics must vary by ~~its~~ subtypes, such as embolic stroke and lacunar stroke. However, sufficient information to classify

1  
2  
3  
4  
5  
6  
7  
8  
9 ischemic stroke into more detailed categories was not available in this study. There are  
10 some resemblance and differences among prefectural stroke registries in various ways,  
11 such as age and sex distribution of strokes and annual monitoring rates of subtype in  
12 stroke. Although, it is difficult to explain the differences sufficiently, factors which  
13 possibly influence the registries and stroke incidence include regional medical services,  
14 socio-epidemiological factors, including industries and climates, prevalence of risk  
15 factors and constitution of societies. Prefectural stroke registries continue efforts to  
16 register as many stroke events as possible, which is, however, often difficult to  
17 accomplish. Nevertheless, since stroke incidence and characteristics may differ from  
18 area to area and from period to period, it is important to continue the registries in order  
19 to elucidate the current situation of stroke and subsequently improve stroke care in each  
20 prefecture.

### 41 42 *Limitations*

43  
44  
45  
46  
47 Firstly, there may be missing data for stroke patients; for example, patients who  
48 died before arriving ~~to~~in hospitals and patients who went to ~~hospital~~hospitals outside of  
49 the prefecture. Patients with mild symptoms ~~might~~may not have visited hospitals and  
50  
51  
52  
53  
54

1  
2  
3  
4  
5  
6  
7  
8  
9 patients with atypical symptoms ~~might~~may not have been diagnosed as such, and  
10  
11 ~~subsequently might~~consequently, may not have been registered [5].  
12

13  
14 ~~Secondary~~Secondarily, the study did not ~~encompass~~include the ~~effect~~types of  
15  
16 therapeutic interventions, which must have ~~affected~~an effect on mortality. It is virtually  
17  
18 impossible to adjust for all the treatments in a very large population based study.  
19

20  
21 Treatments should be studied in randomized controlled studies. The causes of death in  
22  
23 the study cohort were also not investigated ~~either. Possible~~\_\_  
24

25  
26 A possible bias exists in the assessment of variables, such as in the history of  
27  
28 habits, which largely ~~depend~~depends on the patients' self ~~report~~reports or information  
29  
30 from their families. The ~~study~~problem, however, ~~showed~~applied equally to all three  
31  
32 subtypes. The study did show the overall characteristics and mortality in stroke and in  
33  
34 major subtypes, which should shed light on the ~~difference among the major subtypes as~~  
35  
36 ~~a whole, since the comparison was done otherwise in the same condition~~differences.  
37  
38  
39  
40  
41

42  
43 Lastly, the ~~outeomes~~outcome assessment limited to 30 days after onset leaves  
44  
45 the majority of patients (n=11,869, 86.1%) who survived the first month out of  
46  
47 consideration. However, early mortality ~~evaluation within 30 day~~ should reflect a cause  
48  
49 of death directly associated with stroke and therefore correlate with severity in ~~more~~a  
50  
51 direct way.  
52  
53  
54

1  
2  
3  
4  
5  
6  
7  
8  
9  
10  
11 ~~Major conclusions of the study should prevail as a report based on a very large number~~  
12 ~~of patients analyzed under the same conditions.~~  
13  
14  
15

### 16 17 18 19 **Conclusion**

20  
21 We have presented population based data ~~for the span of~~ accrued over 11 years  
22 ~~covering in~~ the ~~entire~~ Kyoto prefecture in Japan. ~~Among~~ As for the major stroke ~~major~~  
23  
24 subtypes, the hazard ratio for death was highest in SAH, followed by CH and lowest in  
25  
26  
27  
28  
29  
30  
31  
32  
33  
34  
35  
36  
37  
38  
39  
40  
41  
42  
43  
44  
45  
46  
47  
48  
49  
50  
51  
52  
53  
54  
55  
56  
57  
58  
59  
60  
CI.

Formatted: Indent: First line: 0.58"

### 35 **Acknowledgments**

36  
37 We acknowledge the contribution of participating institutions and their staffs who  
38  
39  
40  
41  
42  
43  
44  
45  
46  
47  
48  
49  
50  
51  
52  
53  
54  
55  
56  
57  
58  
59  
60  
provided the data in the Kyoto Stroke Registry.

### 45 **Figure Legends**

46  
47  
48  
49  
50  
51  
52  
53  
54  
55  
56  
57  
58  
59  
60  
Kaplan-Meier survival curves of stroke patients

1  
2  
3  
4  
5  
6  
7  
8  
9  
10  
11  
12  
13  
14  
15  
16  
17  
18  
19  
20  
21  
22  
23  
24  
25  
26  
27  
28  
29  
30  
31  
32  
33  
34  
35  
36  
37  
38  
39  
40  
41  
42  
43  
44  
45  
46  
47  
48  
49  
50  
51  
52  
53  
54  
55  
56  
57  
58  
59  
60

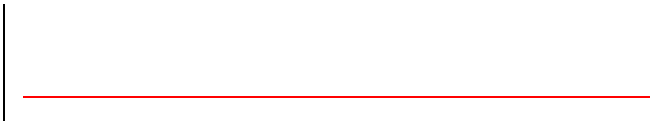

For peer review only

## References

1. Turin TC, Kokubo Y, Murakami Y, et al. Lifetime risk of acute myocardial infarction in Japan. *Circulation*. ~~Cardiovascular quality and outcomes 2010;3(6):701-3 doi: 10.1161/CIRCOUTCOMES.109.930776~~~~[published Online First: Epub Date];2010;3(6):701-3~~ Formatted: Line spacing: single
2. Scarborough P, Morgan RD, Webster P, et al. Differences in coronary heart disease, stroke and cancer mortality rates between England, Wales, Scotland and Northern Ireland: the role of diet and nutrition. *BMJ open* 2011;**1**(1):e000263 doi: 10.1136/bmjopen-2011-000263 ~~[published Online First: Epub Date];~~
3. Lee S, Shafe AC, Cowie MR. UK stroke incidence, mortality and cardiovascular risk management 1999-2008: time-trend analysis from the General Practice Research Database. *BMJ open* 2011;**1**(2):e000269 doi: 10.1136/bmjopen-2011-000269 ~~[published Online First: Epub Date];~~
4. Anderson GL, Whisnant JP. A comparison of trends in mortality from stroke in the United States and Rochester, Minnesota. *Stroke; a journal of cerebral circulation*. 1982;**13**(6):804-9
5. Shigematsu K, Shimamura O, Nakano H, et al. Vomiting should be a prompt predictor of stroke outcome. *Emergency medicine journal : EMJ* 2012 doi: 10.1136/emered-2012-201586 ~~[published Online First: Epub Date];~~
6. Hatano S. Experience from a multicentre stroke register: a preliminary report. *Bulletin of the World Health Organization* 1976;**54**(5):541-53
7. International Classification of Diseases, Ninth Revision, Clinical Modification. Washington, DC: US Department of Health and Human Service. 1988
8. Steindel SJ. International classification of diseases, 10th edition, clinical modification and procedure coding system: descriptive overview of the next generation HIPAA code sets. *Journal of the American Medical Informatics Association : JAMIA* 2010;**17**(3):274-82 doi: 10.1136/jamia.2009.001230 ~~[published Online First: Epub Date];~~
9. Kuzuya T. [Outline of revision of classification and diagnostic criteria of diabetes mellitus in Japan]. *Nihon rinsho*. 1999;**57**(3):561-6
10. Ohta T, Waga S, Handa W, et al. [New grading of level of disordered consciousness (author's transl)]. *No shinkei geka. Neurological surgery* 1974;**2**(9):623-7 Formatted: Line spacing: single

- 1  
2  
3  
4  
5  
6  
7  
8 | ~~1011.~~ Ohta T, Kikuchi H, Hashi K, et al. Nizofenone administration in the acute stage  
9 following subarachnoid hemorrhage. Results of a multi-center controlled  
10 double-blind clinical study. Journal of neurosurgery 1986;**64**(3):420-6 ~~doi:-~~  
11 ~~10.3171/jns.1986.64.3.0420[published Online First: Epub Date]].~~  
12  
13 | ~~1112.~~ Ueda K, Omae T, Hirota Y, et al. Decreasing trend in incidence and mortality  
14 from stroke in Hisayama residents, Japan. Stroke; ~~a journal of cerebral~~  
15 ~~circulation~~ 1981;**12**(2):154-60  
16  
17 | ~~12-13.~~ The Akita Stroke Registry. Secondary Akita Stroke Registry.  
18 <http://www.msuisin.jp/blog/21nousochu.pdf>.  
19  
20 | ~~13.~~ Suzuki K, ~~14.~~ Suzuki K. Stroke recurrence. Treatment 2009;**9**:5-10.  
21  
22 | ~~15.~~ Suzuki K, ~~14.~~ Suzuki K. Epidemiology on recurrent stroke. Prevention of  
23 Atherosclerosis 2010;**91**:2560-4  
24  
25 | ~~15-16.~~ The Iwate Cancer and Stroke Registry. Secondary Iwate Cancer and Stroke  
26 Registry. [http://www.iwate.med.or.jp/gan\\_nou/index.html](http://www.iwate.med.or.jp/gan_nou/index.html).  
27  
28 | ~~16-17.~~ The Tochigi Stroke Registry. Secondary Tochigi Stroke Registry.  
29 [http://www.pref.tochigi.lg.jp/e04/welfare/kenkoudukuri/kenkoudukuri/11732259](http://www.pref.tochigi.lg.jp/e04/welfare/kenkoudukuri/kenkoudukuri/1173225926699.html)  
30 [26699.html](http://www.pref.tochigi.lg.jp/e04/welfare/kenkoudukuri/kenkoudukuri/1173225926699.html).  
31  
32 | ~~17-18.~~ Welcome to the official homepage of Tochigi Prefecture, Japan. Secondary  
33 Welcome to the official homepage of Tochigi Prefecture, Japan.  
34 <http://www.pref.tochigi.lg.jp/english/foreignlanguage.html#english>.  
35  
36 | ~~18-19.~~ The Miyazaki Stroke Registry. Secondary Miyazaki Stroke Registry 2010.  
37 <http://www.msuisin.jp/blog/21nousochu.pdf>.  
38  
39 | ~~19-20.~~ The Iwate Stroke Registry. Secondary Iwate Stroke Registry.  
40 <http://www.pref.iwate.jp/~hp1353/hoken/toukei/nousottyu/index.html>.  
41  
42 | ~~20-21.~~ Turin TC, Kita Y, Murakami Y, et al. Higher stroke incidence in the spring season  
43 regardless of conventional risk factors: Takashima Stroke Registry, Japan,  
44 1988-2001. Stroke; a journal of cerebral circulation 2008;**39**(3):745-52 ~~doi:-~~  
45 ~~10.1161/STROKEAHA.107.495929[published Online First: Epub Date]].~~  
46  
47 | ~~21-22.~~ Turin TC, Kita Y, Murakami Y, et al. Increase of stroke incidence after weekend  
48 regardless of traditional risk factors: Takashima Stroke Registry, Japan;  
49 1988-2003. Cerebrovascular diseases 2007;**24**(4):328-37 ~~doi:-~~  
50 ~~10.1159/000106978[published Online First: Epub Date]].~~  
51  
52 | ~~22-23.~~ Kita Y, Turin TC, Rumana N, et al. Surveillance and measuring trends of stroke in  
53 Japan: the Takashima Stroke Registry (1988 - present). International journal of  
54 stroke ~~: official journal of the International Stroke Society 2007;**2**(2):129-32 doi:-~~  
55  
56  
57  
58  
59  
60

Formatted: Font: Not Bold



1  
2  
3  
4  
5  
6  
7  
8  
9  
10  
11  
12  
13  
14  
15  
16  
17  
18  
19  
20  
21  
22  
23  
24  
25  
26  
27  
28  
29  
30  
31  
32  
33  
34  
35  
36  
37  
38  
39  
40  
41  
42  
43  
44  
45  
46  
47  
48  
49  
50  
51  
52  
53  
54  
55  
56  
57  
58  
59  
60

- ~~10.1111/j.1747-4949.2007.00107.x[published Online First: Epub Date];2007;2(2):129-32~~
- ~~2324.~~ Turin TC, Kita Y, Rumana N, et al. Registration and surveillance of acute myocardial infarction in Japan: monitoring an entire community by the Takashima AMI Registry: system and design. *Circulation journal* 2007;**71**(10):1617-21
- ~~25.~~ Kubo M, Kiyohara Y, Kato I, et al. Trends in the incidence, mortality, and survival rate of cardiovascular disease in a Japanese community: the Hisayama study. *Stroke; a journal of cerebral circulation* 2003;**34**(10):2349-54 ~~doi: 10.1161/01.STR.0000090348.52943.A2[published Online First: Epub Date];~~
- ~~2426.~~ Kiyohara Y, Kubo M, Kato I, et al. Ten-year prognosis of stroke and risk factors for death in a Japanese community: the Hisayama study. *Stroke; a journal of cerebral circulation* 2003;**34**(10):2343-7 ~~doi: 10.1161/01.STR.0000091845.14833.43[published Online First: Epub Date];~~
- ~~2527.~~ Hata J, Tanizaki Y, Kiyohara Y, et al. Ten year recurrence after first ever stroke in a Japanese community: the Hisayama study. *Journal of neurology, neurosurgery, and psychiatry* 2005;**76**(3):368-72 ~~doi: 10.1136/jnnp.2004.038166[published Online First: Epub Date];~~
- ~~2628.~~ Department of Environmental Medicine GSoMS, Kyushu University. About ~~athe~~ Hisayama study. Secondary About ~~athe~~ Hisayama study. <http://www.med.kyushu-u.ac.jp/envmed/about/index.html>.
- ~~2729.~~ Turin TC, Kita Y, Rumana N, et al. Ischemic stroke subtypes in a Japanese population: Takashima Stroke Registry, 1988-2004. *Stroke; a journal of cerebral circulation* 2010;**41**(9):1871-6 ~~doi: 10.1161/STROKEAHA.110.581033[published Online First: Epub Date];~~
- ~~2830.~~ Tanaka H, Ueda Y, Hayashi M, et al. Risk factors for cerebral hemorrhage and cerebral infarction in a Japanese rural community. *Stroke; a journal of cerebral circulation* 1982;**13**(1):62-73
- ~~2931.~~ Hacke W, Schwab S, Horn M, et al. 'Malignant' middle cerebral artery territory infarction: clinical course and prognostic signs. *Archives of neurology* 1996;**53**(4):309-15
- ~~3032.~~ Klatzo I. Brain oedema following brain ischaemia and the influence of therapy. *British journal of anaesthesia* 1985;**57**(1):18-22
- ~~3133.~~ Collins R, Peto R, MacMahon S, et al. Blood pressure, stroke, and coronary heart disease. Part 2, Short-term reductions in blood pressure: overview of randomised drug trials in their epidemiological context. *Lancet* 1990;**335**(8693):827-38

Formatted: Line spacing: single

- 1  
2  
3  
4  
5  
6  
7  
8 [3234](#). Wolf PA, Abbott RD, Kannel WB. Atrial fibrillation as an independent risk factor  
9 for stroke: the Framingham Study. *Stroke; a journal of cerebral circulation*  
10 1991;**22**(8):983-8
- 11 [3335](#). Abbott RD, Donahue RP, MacMahon SW, et al. Diabetes and the risk of stroke.  
12 The Honolulu Heart Program. *JAMA: the journal of the American Medical*  
13 *Association* *JAMA* 1987;**257**(7):949-52
- 14 [3436](#). Wolf PA, D'Agostino RB, Belanger AJ, et al. Probability of stroke: a risk profile  
15 from the Framingham Study. *Stroke; a journal of cerebral circulation*  
16 1991;**22**(3):312-8
- 17 [3537](#). Iso H, Jacobs DR, Jr., Wentworth D, et al. Serum cholesterol levels and six-year  
18 mortality from stroke in 350,977 men screened for the multiple risk factor  
19 intervention trial. *The New England journal of medicine* 1989;**320**(14):904-10-  
20 [doi: 10.1056/NEJM198904063201405](#)[published Online First: Epub Date].
- 21 [3638](#). Bazzano LA, Gu D, Reynolds K, et al. Alcohol consumption and risk for stroke  
22 among Chinese men. *Annals of neurology* 2007;**62**(6):569-78 [doi:](#)  
23 [10.1002/ana.21194](#)[published Online First: Epub Date].
- 24 [3739](#). Djousse L, Ellison RC, Beiser A, et al. Alcohol consumption and risk of ischemic  
25 stroke: The Framingham Study. *Stroke; a journal of cerebral circulation*  
26 2002;**33**(4):907-12
- 27 [3840](#). Balami JS, Chen RL, Grunwald IQ, et al. Neurological complications of acute  
28 ischaemic stroke. *Lancet neurology* 2011;**10**(4):357-71 [doi:](#)  
29 [10.1016/S1474-4422\(10\)70313-6](#)[published Online First: Epub Date].
- 30 [3941](#). Lavados PM, Sacks C, Prina L, et al. Incidence, 30-day case-fatality rate, and  
31 prognosis of stroke in Iquique, Chile: a 2-year community-based prospective  
32 study (PISCIS project). *Lancet* 2005;**365**(9478):2206-15 [doi:](#)  
33 [10.1016/S0140-6736\(05\)66779-7](#)[published Online First: Epub Date].
- 34  
35  
36  
37  
38  
39  
40  
41  
42  
43  
44  
45  
46  
47  
48  
49  
50  
51  
52  
53  
54  
55  
56  
57  
58  
59  
60

1  
2  
3  
4  
5  
6  
7  
8  
9  
10  
11  
12  
13  
14  
15  
16  
17  
18  
19  
20  
21  
22  
23  
24  
25  
26  
27  
28  
29  
30  
31  
32  
33  
34  
35  
36  
37  
38  
39  
40  
41  
42  
43  
44  
45  
46  
47  
48  
49  
50  
51  
52  
53  
54  
55  
56  
57  
58  
59  
60

Figure Kaplan-Meier Survival Curves of stroke patients



Kaplan-Meier survival curves of stroke patients  
215x156mm (300 x 300 DPI)

View only

## Supplementary Table 1A Summary of the Kyoto Stroke Registry Program

### 1. Purpose

The purpose of this registry is to register and analyze all stroke patients in the Kyoto prefecture with the cooperation of the affiliated medical institutions to better understand the facts about stroke patients and to identify effective countermeasures against stroke including prevention, rehabilitation, and home care.

### 2. Implementation body

The Kyoto prefecture entrusts the program to the Kyoto Medical Association. The Kyoto Medical Association conducts the registry with cooperation of affiliated medical associations.

### 3. Registry Committee

The Committee of the Kyoto Medical Association Stroke Registry Program supervises and advises the program for smooth conduction.

### 4. Subjects

The residents of Kyoto prefecture who go to medical institutions that belong to the Kyoto Medical Association may be registration.

### 5. Methods

- (1) The Kyoto Medical Association distributes stroke patients registration forms to the affiliated medical institutions
- (2) The medical institutions fill in and submit the registration forms when their patients fulfill the following criteria.
  - 1 Patients diagnosed with stroke
  - 2 Patients diagnosed with stroke who were treated for stroke or had been treated for stroke and the treatment was discontinued in the past
  - 3 Patients who were once enrolled in the registry and had stroke again
  - 4 Patients whose diagnoses were confirmed as stroke after they were registered with suspected stroke
- (3) The Kyoto Medical Association computerizes the registration forms and registers, stores and analyzes the information
- (4) The Kyoto Medical Association queries the medical institutions if crucial information, such as a patients' address or date of birth, is missing

1  
2  
3  
4  
5  
6 (5) The Kyoto Medical Association informs the medical institutions of the results of its  
7 registry  
8

9  
10  
11 6. Death records

12 The registry is referred with death records  
13

14  
15 7. Follow-up study

16 If needed, a supplementary study and follow-up study are conducted by the Kyoto  
17 Medical Association with the cooperation of the attending physicians  
18

19  
20  
21 8. Cooperation of related associations and organizations

22 This project is conducted with the cooperation of medical institutions and related  
23 associations, organizations, research organizations and expert meetings  
24  
25

26  
27 9. Privacy policy

28 Doctors and any other participants in this registry must protect patient privacy  
29  
30

31  
32 10. Contact with patients

33 Patients must not be contacted without the permission from the attending physicians  
34  
35  
36  
37

38 **Supplementary Table 1B Inclusion and Exclusion criteria for the KSR**  
39

40  
41 [Inclusion criteria]

- 42  
43 1 Patients are registered when they have acute clinical symptoms arising from  
44 cerebrovascular disorders that last for more than 24 hours or lead to death.  
45  
46 2 Patients are registered regardless of their age.  
47  
48 3 Patients are registered regardless of their sex.  
49  
50 4 Patients must have lived in the Kyoto Prefecture.  
51  
52 5 Differential diagnoses have been made by attending physicians based on CT/MRI  
53 images and other clinical examinations.  
54

55 [Exclusion criteria]

- 56  
57 1 When patients are diagnosed with some disorder other than stroke  
58  
59 2 When patients move out of the Kyoto prefecture  
60  
60 3 When patients have stroke-like symptoms but they are caused by non

1  
2  
3  
4  
5  
6 cerebrovascular factors

7       Caused by head trauma

8       Developed during pregnancy, parturition and puerperal periods

9       Caused by drugs and toxins

10       Caused by cancer

11       Caused by hematologic disease

12       Caused by encephalitis or meningitis

13       Caused by shock, Adam-Strokes syndrome or hypertensive encephalopathy

14 4 TIA is also excluded as the symptoms cease within 24 hours after onset

## Supplementary Table 2

Supplementary Table 2-A. Age and Sex Distribution of Strokes in the Kyoto Stroke Registry

Supplementary Table 2-B. Population by Sex and Age, Kyoto Prefecture, Japan

Supplementary Table 2-C. Annual Monitoring Rates of Subtypes in Stroke per 10,000 Populations in Kyoto Prefecture

Supplementary Table 2-D. Age and Sex Distribution of Strokes in the Tochigi Stroke Registry

Supplementary Table 2-E Population by Sex and Age, Tochigi Prefecture, Japan

Supplementary Table 2-F. Annual Monitoring Rates of Subtypes in Stroke per 10,000 Populations in Tochigi Prefecture

Supplementary Table 2-G. Age and Sex Distribution of Strokes in the Miyazaki Stroke Registry

Supplementary Table 2-H. Population by Sex and Age, Miyazaki Prefecture, Japan

Supplementary Table 2-I. Annual Monitoring Rates of Subtypes in Stroke per 10,000 Populations in Miyazaki Prefecture

Supplementary Table 2-A. Age and Sex Distribution of Strokes in the Kyoto Stroke Registry

| Age group | Cerebral infarction |       |       | Cerebral hemorrhage |       |       | Subarachnoid hemorrhage |       |       |
|-----------|---------------------|-------|-------|---------------------|-------|-------|-------------------------|-------|-------|
|           | Men                 | Women | Total | Men                 | Women | Total | Men                     | Women | Total |
| <20       | 5                   | 2     | 7     | 7                   | 3     | 10    | 0                       | 0     | 0     |
| 20-29     | 10                  | 4     | 14    | 13                  | 7     | 20    | 4                       | 4     | 8     |
| 30-39     | 40                  | 22    | 62    | 24                  | 27    | 51    | 20                      | 17    | 37    |
| 40-49     | 122                 | 66    | 188   | 105                 | 59    | 164   | 72                      | 76    | 148   |
| 50-59     | 608                 | 204   | 812   | 374                 | 220   | 594   | 138                     | 180   | 318   |
| 60-69     | 1,516               | 539   | 2,055 | 622                 | 293   | 915   | 116                     | 194   | 310   |
| 70-79     | 1,706               | 1,131 | 2,937 | 498                 | 449   | 947   | 53                      | 174   | 227   |
| 80-89     | 927                 | 1,417 | 2,344 | 219                 | 450   | 669   | 21                      | 105   | 126   |
| >90       | 160                 | 1417  | 2344  | 57                  | 122   | 179   | 0                       | 23    | 23    |

Supplementary Table 2-B. Population by Sex and Age, Kyoto Prefecture, Japan (2010)

Age group

|              | 20-29   | 30-39   | 40-49   | 50-59   | 60-69   | 70-79   | 80-89  | >90    |
|--------------|---------|---------|---------|---------|---------|---------|--------|--------|
| <b>Men</b>   | 153,750 | 180,802 | 161,356 | 147,768 | 186,956 | 119,094 | 48,383 | 6,030  |
| <b>Women</b> | 152,528 | 184,729 | 167,751 | 158,029 | 206,016 | 144,563 | 87,673 | 23,313 |

Supplementary Table 2-C. Annual Monitoring Rates of Subtype in Stroke per 10,000 populations in the Kyoto Stroke Registry

| <b>Sub</b> | <b>Age group</b> |       |       |       |       |       |       |       |       |
|------------|------------------|-------|-------|-------|-------|-------|-------|-------|-------|
|            | <b>Sex</b>       | 20-29 | 30-39 | 40-49 | 50-59 | 60-69 | 70-79 | 80-89 | >90   |
| <b>CI</b>  | Men              | 0.06  | 0.20  | 0.69  | 3.74  | 7.37  | 13.02 | 17.43 | 24.12 |
|            | Women            | 0.02  | 0.11  | 0.36  | 1.17  | 3.10  | 7.11  | 14.69 | 55.26 |
| <b>CH</b>  | Men              | 0.08  | 0.12  | 0.59  | 2.30  | 3.03  | 3.80  | 4.12  | 8.59  |
|            | Women            | 0.04  | 0.13  | 0.32  | 1.27  | 1.29  | 2.82  | 4.67  | 4.76  |
| <b>SAH</b> | Men              | 0.02  | 0.10  | 0.41  | 0.85  | 0.56  | 0.41  | 0.40  | 0.00  |
|            | Women            | 0.02  | 0.08  | 0.41  | 1.04  | 0.86  | 1.09  | 1.09  | 0.90  |

Supplementary Table 2-D. Age and Sex Distribution of Strokes in the Tochigi Stroke Registry

| <b>Age group</b> | <b>Cerebral infarction</b> |       |       | <b>Cerebral hemorrhage</b> |       |       | <b>Subarachnoid hemorrhage</b> |       |       |
|------------------|----------------------------|-------|-------|----------------------------|-------|-------|--------------------------------|-------|-------|
|                  | Men                        | Women | Total | Men                        | Women | Total | Men                            | Women | Total |
| <b>-39</b>       | 15                         | 4     | 19    | 13                         | 2     | 15    | 5                              | 7     | 12    |
| <b>40-49</b>     | 42                         | 10    | 52    | 33                         | 7     | 40    | 10                             | 14    | 24    |
| <b>50-59</b>     | 118                        | 30    | 148   | 78                         | 42    | 120   | 13                             | 22    | 33    |
| <b>60-69</b>     | 300                        | 83    | 383   | 110                        | 56    | 166   | 23                             | 43    | 66    |
| <b>70-79</b>     | 334                        | 199   | 533   | 89                         | 77    | 166   | 5                              | 36    | 41    |
| <b>80-89</b>     | 262                        | 322   | 584   | 59                         | 85    | 144   | 7                              | 32    | 39    |
| <b>&gt;90</b>    | 34                         | 103   | 137   | 4                          | 9     | 13    | 0                              | 4     | 4     |

Supplementary Table 2-E. Population by Sex and Age, Tochigi Prefecture, Japan (2010)

|              | <b>Age group</b> |         |         |         |         |        |        |
|--------------|------------------|---------|---------|---------|---------|--------|--------|
|              | -39              | 40-49   | 50-59   | 60-69   | 70-79   | 80-89  | >90    |
| <b>Men</b>   | 493,600          | 128,100 | 147,400 | 141,000 | 84,700  | 38,500 | 4,000  |
| <b>Women</b> | 447,100          | 120,200 | 141,200 | 139,400 | 105,200 | 74,700 | 17,500 |

Supplementary Table 2-F. Annual Monitoring Rates of Subtype in Stroke per 10,000



Populations in the Tochigi Stroke Registry

| Sub | Age group |      |       |       |       |       |       |       |
|-----|-----------|------|-------|-------|-------|-------|-------|-------|
|     | Sex       | -39  | 40-49 | 50-59 | 60-69 | 70-79 | 80-89 | >90   |
| CI  | Men       | 0.30 | 3.28  | 8.01  | 21.28 | 39.43 | 68.05 | 80.00 |
|     | Women     | 0.09 | 0.83  | 2.13  | 5.95  | 18.92 | 43.11 | 58.86 |
| CH  | Men       | 0.26 | 2.58  | 5.29  | 7.80  | 10.51 | 15.36 | 10.00 |
|     | Women     | 0.04 | 0.08  | 2.98  | 4.02  | 7.32  | 11.38 | 5.14  |
| SAH | Men       | 0.10 | 0.78  | 0.88  | 1.63  | 0.59  | 1.82  | 0.00  |
|     | Women     | 0.16 | 1.16  | 1.56  | 3.08  | 3.42  | 4.28  | 2.29  |

Supplementary Table 2-G. Age and Sex Distribution of Strokes in the Miyazaki Stroke Registry

| Age group | Cerebral infarction |       |       | Cerebral hemorrhage |       |       | Subarachnoid hemorrhage |       |       |
|-----------|---------------------|-------|-------|---------------------|-------|-------|-------------------------|-------|-------|
|           | Men                 | Women | Total | Men                 | Women | Total | Men                     | Women | Total |
| <20       | 0                   | 0     | 0     | 0                   | 1     | 1     | 0                       | 0     | 0     |
| 20-29     | 0                   | 0     | 0     | 0                   | 0     | 0     | 1                       | 0     | 1     |
| 30-39     | 2                   | 3     | 5     | 5                   | 2     | 7     | 4                       | 0     | 4     |
| 40-49     | 11                  | 7     | 18    | 13                  | 10    | 23    | 5                       | 4     | 9     |
| 50-59     | 60                  | 21    | 81    | 49                  | 15    | 64    | 3                       | 8     | 11    |
| 60-69     | 97                  | 64    | 161   | 78                  | 33    | 111   | 7                       | 20    | 27    |
| 70-79     | 222                 | 144   | 366   | 73                  | 69    | 142   | 3                       | 33    | 36    |
| 80-89     | 150                 | 177   | 327   | 39                  | 66    | 105   | 3                       | 20    | 23    |
| >90       | 23                  | 60    | 83    | 11                  | 14    | 25    | 0                       | 3     | 3     |

Supplementary Table 2-H. Population by Sex and Age, Miyazaki Prefecture, Japan (2010)

|       | Age group |        |        |        |        |        |        |       |
|-------|-----------|--------|--------|--------|--------|--------|--------|-------|
|       | 20-29     | 30-39  | 40-49  | 50-59  | 60-69  | 70-79  | 80-89  | >90   |
| Men   | 19,314    | 26,526 | 23,726 | 26,037 | 25,650 | 16,164 | 7,337  | 982   |
| Women | 22,034    | 28,537 | 26,656 | 28,889 | 28,656 | 20,935 | 13,219 | 3,544 |

Supplementary Table 2-I. Annual Monitoring Rates of Subtype in Stroke per 10,000 Populations in the Miyazaki Stroke Registry

| Sub | Age group |
|-----|-----------|
|-----|-----------|

| <b>-type</b> | Sex   | 20-29 | 30-39 | 40-49 | 50-59 | 60-69 | 70-79  | 80-89  | >90    |
|--------------|-------|-------|-------|-------|-------|-------|--------|--------|--------|
| <b>CI</b>    | Men   | 0.00  | 0.75  | 4.64  | 23.04 | 37.82 | 137.34 | 204.44 | 234.22 |
|              | Women | 0.00  | 1.05  | 2.63  | 7.27  | 22.33 | 68.78  | 133.90 | 169.30 |
| <b>CH</b>    | Men   | 0.00  | 1.88  | 5.48  | 18.82 | 30.41 | 45.16  | 53.16  | 112.02 |
|              | Women | 0.00  | 0.75  | 3.75  | 5.19  | 11.52 | 32.96  | 49.93  | 39.50  |
| <b>SAH</b>   | Men   | 0.52  | 1.51  | 2.11  | 1.15  | 2.73  | 1.86   | 1.36   | 0.00   |
|              | Women | 0.00  | 0.00  | 1.50  | 2.77  | 6.98  | 15.76  | 15.13  | 8.47   |

Supplementary Table 3 Characteristics of stroke patients in Group-A and in Group-B

| <b>Group-A</b>                                                        | <b>Overall<br/>n=7,886</b> | <b>Cerebral<br/>infarction n=<br/>5,247(66.6%)</b> | <b>Cerebral<br/>hemorrhage<br/>n=1,896<br/>(24.1%)</b> | <b>Subarachnoid<br/>hemorrhage<br/>n=711 (9.0%)</b> |
|-----------------------------------------------------------------------|----------------------------|----------------------------------------------------|--------------------------------------------------------|-----------------------------------------------------|
| <b>Age (mean± SD)</b>                                                 | 70.5±12.7                  | 72.5±11.6                                          | 68.5±13.3                                              | 61.2±13.5                                           |
| <b>Sex, % female<br/>(n=female:<br/>male)</b>                         | 44.8<br>(3,531:4,349)      | 41.9<br>(2,196:3,051)                              | 46.1<br>(875:1,021)                                    | 62.9 (447:264)                                      |
| <b>Systolic blood<br/>pressure (mean±<br/>SD), mmHg</b>               | 161.5±31.6                 | 158.1±28.5                                         | 172.4±35.1                                             | 157.2±36.7                                          |
| <b>Diastolic blood<br/>pressure (mean±<br/>SD), mmHg</b>              | 87.3±18.7                  | 85.8±17.2                                          | 92.4±20.6                                              | 85.4±21.8                                           |
| <b>Hypertension<br/>history, %<br/>(n=with:<br/>without)</b>          | 60.2<br>(4379:2,900)       | 59.2<br>(2,922:2,016)                              | 67.3<br>(1,148:557)                                    | 48.3 (296:317)                                      |
| <b>Arrhythmia,<br/>(n=with:<br/>without)</b>                          | % 14.9<br>(1,132:6,446)    | 19.4<br>(988:4,110)                                | 5.4 (97:1,694)                                         | 6.9 (46:617)                                        |
| <b>Arrhythmia<br/>history, %<br/>(n=with:<br/>without)</b>            | 19.0 (74.7)                | 25.1<br>(1,243:3,704)                              | 6.3<br>(107:1,580)                                     | 5.3 (32:576)                                        |
| <b>Diabetes<br/>mellitus<br/>history, %<br/>(n=with:<br/>without)</b> | 20.5<br>(1,500:5,827)      | 24.2<br>(1,209:3,796)                              | 14.5<br>(245:1,447)                                    | 6.8 (41:565)                                        |
| <b>Hyperlipemia<br/>history, %<br/>(n=with:<br/>without)</b>          | 17.5<br>(1,250:5,910)      | 21.0<br>(1,028:3,869)                              | 10.7<br>(177:1,472)                                    | 7.1 (42:547)                                        |
| <b>Tobacco use, %</b>                                                 | 33.6                       | 33.6                                               | 30.6                                                   | 40.0 (218:327)                                      |

|                                                                   |                       |                       |                     |                |
|-------------------------------------------------------------------|-----------------------|-----------------------|---------------------|----------------|
| (n=with:<br>without)                                              | (2,152:4,259)         | (1,482:2,925)         | (441:998)           |                |
| <b>Non smoker, %<br/>(n)</b>                                      | 60.5 (3,797)          | 66.4 (2,925)          | 69.4 (998)          | 60.0 (327)     |
| <b>Former<br/>smoker, % (n)</b>                                   | 4.4 (281)             | 4.6 (202)             | 4.9 (70)            | 1.7 (9)        |
| <b>Light<br/>smoker, % (n)</b>                                    | 17.7 (1,132)          | 17.7 (782)            | 15.0 (216)          | 23.5 (128)     |
| <b>Heavy<br/>smoker, % (n)</b>                                    | 11.5 (739)            | 11.3 (498)            | 10.8 (155)          | 14.9 (81)      |
| <b>Alcohol use, %<br/>(n=with:<br/>without)</b>                   | 39.5<br>(2,478:3,797) | 37.8<br>(1,624:2,669) | 41.3<br>(585:832)   | 47.5 (258)     |
| <b>Non drinker, %<br/>(n)</b>                                     | 60.5 (3,797)          | 62.2 (2,669)          | 58.7 (832)          | 52.5 (285)     |
| <b>Occasional<br/>drinker, % (n)</b>                              | 17.6 (1,105)          | 17.6 (754)            | 15.8 (224)          | 22.1 (120)     |
| <b>Every day<br/>drinker, % (n)</b>                               | 21.9 (1,373)          | 20.3 (870)            | 25.5 (361)          | 25.4 (138)     |
| <b>Paresis, %<br/>(n=with:<br/>without)</b>                       | 73.7<br>(5,581:1,987) | 78.0<br>(3,996:1,129) | 78.8<br>(1,417:382) | 24.4 (151:467) |
| <b>Consciousness<br/>disturbance, %<br/>(n=with:<br/>without)</b> | 42.4<br>(3,290:4,463) | 31.7<br>(1,634:3,518) | 64.9<br>(1,213:657) | 60.4 (426:279) |
| <b>JCS 0, % (n)</b>                                               | 58.6 (4,463)          | 69.3 (3,518)          | 35.7 (657)          | 40.8 (279)     |
| <b>JCS 1-digit<br/>code, % (n)</b>                                | 18.5 (1,409)          | 16.5 (837)            | 25.5 (468)          | 14.5 (99)      |
| <b>JCS 2-digit<br/>code, % (n)</b>                                | 11.8 (896)            | 9.1 (462)             | 17.8 (327)          | 14.8 (101)     |
| <b>JCS 3-digit<br/>code, % (n)</b>                                | 11.2 (853)            | 5.1 (257)             | 21.0 (386)          | 30.0 (205)     |
| <b>Delay time<br/>(mean± SD)</b>                                  | 4.15±5.03             | 4.55±5.42             | 3.48±4.12           | 3.40±4.23      |
| <b>CT, % (n)</b>                                                  | 92.4 (7,285)          | 89.4 (4,969)          | 98.0 (1,860)        | 98.9 (704)     |

|                                   |                   |                 |                  |                |
|-----------------------------------|-------------------|-----------------|------------------|----------------|
| <b>MRI, % (n)</b>                 | 59.4 (4,682)      | 74.4 (3,907)    | 33.7 (639)       | 17.6 (125)     |
| <b>Surgery</b>                    | % 17.6            | 4.8             | 69.1             | 77.1 (529:157) |
| <b>(n=with: without)</b>          | (1,356:6,339)     | (244:4,885)     | (573:1,282)      |                |
| <b>Mortality, (n=dead: alive)</b> | % 9.5 (745:7,097) | 5.0 (262:4,965) | 15.5 (292:1,592) | 26.9 (190:516) |

When the numbers entered in the table above are significantly different between different types of strokes, they are marked as follows:

\*1: significant difference between cerebral infarction and cerebral hemorrhage;

\*2: sig. difference between cerebral hemorrhage and subarachnoid hemorrhage;

\*3: sig. difference between subarachnoid hemorrhage and cerebral infarction;

SD = Standard Deviation

Supplementary Table 3: *continue*

| <b>Group B</b>                                               | <b>Overall<br/>n=5907</b> | <b>Cerebral<br/>Infarction<br/>n= 3,764(%)</b> | <b>Cerebral<br/>Hemorrhage<br/>n=1,653 (%)</b> | <b>Subarachnoi<br/>d<br/>Hemorrhage<br/>n=486 (%)</b> |
|--------------------------------------------------------------|---------------------------|------------------------------------------------|------------------------------------------------|-------------------------------------------------------|
| <b>Age (mean± SD)</b>                                        | 72.3±13.0                 | 74.4±12.0                                      | 69.8±13.9                                      | 64.9±13.3                                             |
| <b>Sex, % female<br/>(n=female:<br/>male)</b>                | 45.7<br>(2,702:3,206)     | 43.0<br>(1,619:2,145)                          | 45.7<br>(755:898)                              | 67.1<br>(326:160)                                     |
| <b>Systolic blood<br/>pressure (mean±<br/>SD), mmHg</b>      | 161±31.5                  | 156.6±28.0                                     | 171.9±34.5                                     | 159.0±37.4                                            |
| <b>Diastolic blood<br/>pressure (mean±<br/>SD), mmHg</b>     | 88.0±19.0                 | 85.3±16.7                                      | 93.9±21.6                                      | 88.9±21.6                                             |
| <b>Hypertension<br/>history, %<br/>(n=with:<br/>without)</b> | 65.9<br>(3,626:1,880)     | 65.8<br>(2,363:1,226)                          | 69.7<br>(1,035:449)                            | 52.2<br>(224:205)                                     |
| <b>Arrhythmia, %<br/>(n=with:<br/>without)</b>               | 14.0 (800:4,906)          | 18.2<br>(659:2,954)                            | 6.4<br>(103:1,515)                             | 7.6 (36:435)                                          |
| <b>Arrhythmia</b>                                            | 17.7 (974:4,531)          | 23.0                                           | 8.7                                            | 5.3 (23:409)                                          |

|                       |               |               |               |             |               |
|-----------------------|---------------|---------------|---------------|-------------|---------------|
| <b>history,</b>       | <b>%</b>      |               | (817:2,728)   | (133:1,391) |               |
| <b>(n=with:</b>       |               |               |               |             |               |
| <b>without)</b>       |               |               |               |             |               |
| <b>Diabetes</b>       | 21.4          |               | 25.7          | 15.1        | 7.0 (30:398)  |
| <b>mellitus</b>       | (1,189:4,371) |               | (929:2,679)   | (229:1,291) |               |
| <b>history,</b>       | <b>%</b>      |               |               |             |               |
| <b>(n=with:</b>       |               |               |               |             |               |
| <b>without)</b>       |               |               |               |             |               |
| <b>Hyperlipemia</b>   | 21.4          |               | 26.0          | 13.1        | 12.1 (51:371) |
| <b>history,</b>       | <b>%</b>      | (1,169:4,288) | (923:2,631)   | (194:1,283) |               |
| <b>(n=with:</b>       |               |               |               |             |               |
| <b>without)</b>       |               |               |               |             |               |
| <b>Tobacco use,</b>   | <b>%</b>      | 30.9          | 31.1          | 29.6        | 33.3          |
| <b>(n=with:</b>       |               | (1,513:3,383) | (973:2,152)   | (402:958)   | (136:272)     |
| <b>without)</b>       |               |               |               |             |               |
| <b>Non smoker,</b>    | <b>%</b>      | 69.1 (3,383)  | 68.9 (2,152)  | 70.4 (958)  | 66.7 (272)    |
| <b>(n)</b>            |               |               |               |             |               |
| <b>Former</b>         | 6.8 (334)     |               | 7.5 (233)     | 6.5 (89)    | 2.7 (11)      |
| <b>smoker, % (n)</b>  |               |               |               |             |               |
| <b>Light</b>          | 16.1 (786)    |               | 16.0 (499)    | 14.2 (193)  | 23.0 (94)     |
| <b>smoker, % (n)</b>  |               |               |               |             |               |
| <b>Heavy</b>          | 8.0 (393)     |               | 7.7 (241)     | 8.8 (120)   | 7.6 (31)      |
| <b>smoker, % (n)</b>  |               |               |               |             |               |
| <b>Alcohol use,</b>   | <b>%</b>      | 36.1          | 34.2          | 39.7        | 38.3          |
| <b>(n=with:</b>       |               | (1,722:3,051) | (1,030:1,986) | (539:818)   | (154:248)     |
| <b>without)</b>       |               |               |               |             |               |
| <b>Non drinker,</b>   | <b>%</b>      | 63.9 (3,054)  | 65.8 (1,986)  | 60.3 (818)  | 61.7 (248)    |
| <b>(n)</b>            |               |               |               |             |               |
| <b>Occasional</b>     | 12.3 (587)    |               | 12.5 (377)    | 11.1 (150)  | 14.7 (59)     |
| <b>drinker, % (n)</b> |               |               |               |             |               |
| <b>Every day</b>      | 23.8 (1,137)  |               | 21.7 (653)    | 28.7 (389)  | 23.6 (95)     |
| <b>drinker, % (n)</b> |               |               |               |             |               |
| <b>Paresis,</b>       | <b>%</b>      | 72.7          | 75.1          | 78.3        | 30.4          |
| <b>(n=with:</b>       |               | (4,087:1,534) | (2,754:912)   | (1,207:335) | (126:289)     |
| <b>without)</b>       |               |               |               |             |               |
| <b>Consciousness</b>  | 45.0          |               | 31.8          | 66.7        | 72.0          |

|                                        |                  |                 |                  |                |
|----------------------------------------|------------------|-----------------|------------------|----------------|
| <b>disturbance, %</b>                  | (2,624:3,207)    | (1,181:2,530)   | (1,092:544)      | (349:136)      |
| <b>(n=with:<br/>without)</b>           |                  |                 |                  |                |
| <b>JCS 0, % (n)</b>                    | 55.5 (3,213)     | 68.8 (2,530)    | 33.5 (544)       | 28.3 (136)     |
| <b>JSC 1-digit code, % (n)</b>         | 20.9 (1,210)     | 18.2 (671)      | 27.9 (453)       | 17.9 (86)      |
| <b>JSC 2-digit code, % (n)</b>         | 12.2 (706)       | 8.5 (312)       | 18.2 (295)       | 20.6 (99)      |
| <b>JSC 3-digit code, % (n)</b>         | 11.3 (656)       | 4.5 (164)       | 20.3 (330)       | 33.3 (481)     |
| <b>Delay time (mean± SD)</b>           | 3.60±4.54        | 3.76±4.88       | 3.52±4.13        | 2.75±2.99      |
| <b>CT, % (n)</b>                       | 86.1 (5,080)     | 79.0 (2,972)    | 98.4 (1,625)     | 98.8 (479)     |
| <b>MRI, % (n)</b>                      | 71.3 (4,209)     | 86.2 (3,241)    | 47.8 (790)       | 36.1 (175)     |
| <b>Surgery % (n=with:<br/>without)</b> | 13.9 (815:5,060) | 3.5 (130:3,610) | 20.8 (342:1,306) | 71.0 (342:140) |
| <b>Mortality, % (n=dead: alive)</b>    | 10.2 (599:5,294) | 5.5 (205:3,549) | 14.8 (244/1,405) | 30.5 (148:337) |

When the numbers entered in the table above are significantly different between different types of strokes, they are marked as follows:

- \*1: significant difference between cerebral infarction and cerebral hemorrhage;
- \*2: sig. difference between cerebral hemorrhage and subarachnoid hemorrhage;
- \*3: sig. difference between subarachnoid hemorrhage and cerebral infarction;

SD = Standard Deviation

## Supplementary Table 4 A

## Hazard Ratios for death in Group A, comparing stroke subtypes

|                         | Hazard Ratio | 95% Confidence Interval |       | P      |
|-------------------------|--------------|-------------------------|-------|--------|
|                         |              | Lower                   | Upper |        |
| Cerebral infarction     | Reference    |                         |       |        |
| Cerebral hemorrhage     | 4.48         | 3.46                    | 5.79  | <0.001 |
| Subarachnoid hemorrhage | 9.39         | 6.88                    | 12.82 | <0.001 |

Adjusted for age, sex, histories of hypertension, arrhythmia, diabetes mellitus and hyperlipemia, and uses of tobacco and alcohol

## Supplementary Table 4 B

## Hazard Ratios for death in Group B, comparing stroke subtypes

|                         | HR        | 95% Confidence Interval |       | P      |
|-------------------------|-----------|-------------------------|-------|--------|
|                         |           | Lower                   | Upper |        |
| Cerebral infarction     | Reference |                         |       |        |
| Cerebral hemorrhage     | 3.01      | 2.35                    | 3.85  | <0.001 |
| Subarachnoid hemorrhage | 8.36      | 6.16                    | 11.34 | <0.001 |

Adjusted for age, sex, histories of hypertension, arrhythmia, diabetes mellitus and hyperlipemia, and uses of tobacco and alcohol
